# Supplementary material for: Integrated analysis of long non-coding RNAs (lncRNAs) and mRNA expression profiles identifies lncRNA PRKG1-AS1 playing important roles in skeletal muscle aging
Source: Aging (Albany NY). 2021 May 29;13(11):15044–60. doi: 10.18632/aging.203067 (PMC8221296; doi:10.18632/aging.203067)
Supplement: Supplementary Table 1 [file aging-13-203067-s001.xlsx]

## Sheet: Sheet1
Supplementary Table 1. The list of differentially expressed genes.
ID	Symbol	log2FC	P value	FDR	regulate	mean_Old	mean_Yong	fpkm_Old1	fpkm_Old2	fpkm_Old3	fpkm_Young1	fpkm_Young2	fpkm_Young3
ENSG00000108342	CSF3	-3.45987	2.21877e-09	3.08186e-05	down	0.567801	7.24806	0.338145	0.346575	1.01868	6.09556	6.26781	9.3808
ENSG00000259371	AL136295.3	-7.05702	6.97089e-09	3.56137e-05	down	0	13.2161	0	0	0	0	19.9302	19.7179
ENSG00000164434	FABP7	-3.33536	7.69195e-09	3.56137e-05	down	0.190848	2.83568	0.201974	0.289293	0.0812759	4.22505	1.95364	2.32836
ENSG00000214097	SMCO1	-2.78675	6.43194e-08	0.000223349	down	3.11227	22.0669	5.10265	3.40004	0.834118	24.3662	28.3779	13.4567
ENSG00000169436	COL22A1	-5.1299	4.10719e-07	0.00114098	down	0.0139463	3.88983	0.00845485	0.0269474	0.00643677	11.0422	0.0115476	0.615759
ENSG00000106366	SERPINE1	-3.62785	5.53969e-06	0.0128244	down	2.49237	31.9471	3.09157	1.7689	2.61664	7.16368	6.15206	82.5255
ENSG00000267022	AC067968.1	-1.90207	1.09637e-05	0.0217552	down	0.0146173	0.328381	0	0.028136	0.015716	0.351513	0.427099	0.206531
ENSG00000124491	F13A1	3.3326	1.45529e-05	0.0252674	up	56.3719	5.50558	130.954	26.5263	11.6349	4.28404	7.36929	4.86342
ENSG00000245848	CEBPA	2.14502	1.91361e-05	0.0295333	up	12.7569	2.80685	9.0854	16.3286	12.8568	2.2871	3.63736	2.49609
ENSG00000013588	GPRC5A	-2.20092	2.49771e-05	0.0346718	down	0.265887	1.58225	0.260912	0.453383	0.0833675	2.73164	1.06898	0.946117
ENSG00000164284	GRPEL2	-1.5971	2.84693e-05	0.0346718	down	1.03748	3.34126	1.21343	1.11991	0.779102	3.08811	3.52206	3.41362
ENSG00000075702	WDR62	-2.20056	2.99541e-05	0.0346718	down	0.386764	2.13745	0.847177	0.130262	0.182853	3.22517	0.948122	2.23905
ENSG00000116329	OPRD1	-1.39807	3.26999e-05	0.0349386	down	0.00415633	0.174503	0	0.012469	0	0.026958	0.211112	0.285438
ENSG00000173369	C1QB	3.50867	4.89264e-05	0.048542	up	53.2433	4.58669	134.939	15.1599	9.63064	2.7261	6.77333	4.26064
ENSG00000135469	COQ10A	-1.76983	6.58348e-05	0.0553955	down	3.49474	12.1586	6.22255	2.9552	1.30647	10.5043	17.4433	8.5281
ENSG00000173372	C1QA	3.40364	6.72289e-05	0.0553955	up	64.471	6.00153	159.723	23.5051	10.1848	4.7181	9.45787	3.82863
ENSG00000159189	C1QC	3.29185	6.86882e-05	0.0553955	up	45.5822	4.56447	114.069	13.5826	9.09503	3.22628	6.17947	4.28767
ENSG00000104848	KCNA7	-1.57368	7.17868e-05	0.0553955	down	2.64308	8.06514	4.79192	1.78704	1.35028	7.33916	8.17325	8.68302
ENSG00000129173	E2F8	-1.83347	8.35077e-05	0.0610485	down	1.4205	5.31897	2.17662	1.07464	1.01025	2.40931	4.01851	9.52909
ENSG00000112299	VNN1	2.91177	9.69049e-05	0.0658989	up	1.48794	0.11101	0.729227	3.27121	0.46338	0.158504	0.082936	0.09159
ENSG00000270765	GAS2L2	-2.82284	9.96311e-05	0.0658989	down	0.0383397	0.878829	0.018466	0.096553	0	1.82913	0.243258	0.564099
ENSG00000137727	ARHGAP20	1.95755	0.000162976	0.102129	up	2.14189	0.47721	3.24065	1.73016	1.45487	0.624733	0.43947	0.367427
ENSG00000175592	FOSL1	-2.16693	0.000169112	0.102129	down	0.763507	3.77774	0.525287	0.897119	0.868115	3.45293	1.99979	5.88049
ENSG00000132465	JCHAIN	3.41586	0.000199534	0.11548	up	5.62518	0.436431	13.9302	1.17677	1.76855	0.313824	0.771681	0.22379
ENSG00000151365	THRSP	2.34212	0.000220947	0.121396	up	8.19216	1.53538	5.07359	13.5961	5.90678	1.66098	1.52702	1.41814
ENSG00000239388	ASB14	-1.70303	0.000227235	0.121396	down	1.673	5.67258	1.62612	2.53309	0.859783	5.31108	8.64656	3.06012
ENSG00000272414	FAM47E-STBD1	-3.426	0.000268222	0.137747	down	0.566216	7.06052	0.383309	0.840282	0.475055	19.8113	0.716119	0.654129
ENSG00000268173	AC007192.1	-3.26812	0.000277676	0.137747	down	0.019716	1.05333	0.002831	0	0.056317	0.008991	1.3782	1.77281
ENSG00000094796	KRT31	-2.48388	0.000302128	0.144709	down	0.102764	1.03426	0.188191	0.089584	0.030518	2.23463	0.560308	0.307857
ENSG00000158008	EXTL1	-2.49797	0.000322149	0.149155	down	0.556468	3.60831	1.162	0.100071	0.407329	7.37649	0.785006	2.66344
ENSG00000102575	ACP5	2.93846	0.00038559	0.172769	up	2.86346	0.286576	6.39122	1.7521	0.447053	0.192255	0.271117	0.396356
ENSG00000071282	LMCD1	-1.32442	0.000412998	0.179267	down	5.26893	13.3455	7.95999	4.94722	2.89957	11.6786	13.2232	15.1347
ENSG00000204248	COL11A2	-2.5272	0.000459629	0.186528	down	0.419049	2.89206	0.312709	0.43002	0.514417	7.46755	0.581588	0.62705
ENSG00000187642	PERM1	-1.53324	0.00045975	0.186528	down	12.0864	35.1717	12.9465	17.8796	5.43314	48.6917	32.8147	24.0088
ENSG00000114737	CISH	-1.47068	0.000470014	0.186528	down	1.07706	3.16226	0.741676	1.43371	1.0558	2.10661	3.81437	3.56579
ENSG00000149534	MS4A2	2.41	0.000501619	0.191578	up	0.726312	0.0554752	1.74625	0.304088	0.128599	0.0496507	0.0700842	0.0466908
ENSG00000196139	AKR1C3	3.57131	0.000510323	0.191578	up	38.4807	3.14562	6.72441	2.62551	106.092	3.86291	2.69486	2.8791
ENSG00000163395	IGFN1	-4.32825	0.000569563	0.20329	down	2.14869	45.0713	5.59977	0.0685277	0.777778	53.5333	0.445058	81.2355
ENSG00000160808	MYL3	-1.50169	0.000570792	0.20329	down	168.106	476.215	200.506	150.271	153.541	401.703	254.07	772.873
ENSG00000188338	SLC38A3	-1.70395	0.000642062	0.219942	down	1.02121	3.5528	0.976155	1.44027	0.647193	2.7104	6.44751	1.50049
ENSG00000144460	NYAP2	-2.25448	0.000649217	0.219942	down	0.114074	0.921483	0.142421	0.172085	0.027717	0.164285	2.04893	0.551233
ENSG00000185915	KLHL34	-1.24007	0.00068079	0.225147	down	2.47119	5.97342	3.81963	1.71942	1.87452	5.71129	4.78202	7.42696
ENSG00000150782	IL18	2.2611	0.000707738	0.228062	up	4.53535	0.866995	2.80009	2.94024	7.86573	0.549068	1.50642	0.545498
ENSG00000078814	MYH7B	-1.85849	0.000735657	0.228062	down	3.75702	13.8866	5.12649	1.09319	5.05138	23.4389	7.74917	10.4719
ENSG00000159176	CSRP1	-1.28874	0.000738862	0.228062	down	3.04452	7.58252	4.5793	2.17549	2.37876	10.3299	7.4155	5.00215
ENSG00000172602	RND1	-1.99062	0.000797764	0.240054	down	0.85116	3.67998	0.604226	0.700557	1.2487	7.21966	2.42136	1.39892
ENSG00000060762	MPC1	-1.38906	0.000812277	0.240054	down	6.99204	18.4746	5.19315	6.29545	9.48753	19.7022	21.3038	14.4177
ENSG00000164520	RAET1E	2.2702	0.000880185	0.251788	up	0.59409	0.0438854	0.614237	0.452985	0.71505	0	0.0207341	0.110922
ENSG00000175946	KLHL38	-1.25219	0.000890507	0.251788	down	4.50724	10.8746	5.43464	5.34603	2.74104	14.8782	9.95181	7.79381
ENSG00000234444	ZNF736	1.68779	0.000906365	0.251788	up	1.27674	0.327342	1.73075	1.32582	0.773663	0.388806	0.28873	0.304492
ENSG00000260314	MRC1	2.58686	0.000935798	0.254867	up	14.2139	2.28252	34.704	5.16833	2.7693	2.00865	2.46699	2.37192
ENSG00000166278	C2	2.82703	0.00104773	0.279864	up	4.8151	0.592648	12.4704	1.1977	0.77724	0.492651	0.39104	0.894251
ENSG00000126945	HNRNPH2	3.6553	0.00112648	0.29216	up	8.33343	0.569345	23.8361	0.606841	0.557362	0.485998	0.579349	0.642687
ENSG00000184544	DHRS7C	-1.41853	0.00113583	0.29216	down	14.6433	39.3109	15.5181	22.7956	5.6162	31.9892	56.1349	29.8086
ENSG00000175556	LONRF3	1.73348	0.00116942	0.295331	up	7.17561	2.08797	4.2999	7.39631	9.83062	2.46876	2.40715	1.38801
ENSG00000123342	MMP19	-1.51755	0.00126192	0.311597	down	1.15034	3.47977	1.49778	1.00552	0.947716	1.23933	2.8894	6.31059
ENSG00000198894	CIPC	-1.52322	0.00128037	0.311597	down	4.08654	11.9334	2.75387	4.50067	5.00508	16.7762	4.78889	14.2352
ENSG00000173110	HSPA6	-2.27203	0.00130112	0.311597	down	3.92593	19.3454	3.48225	7.06981	1.22573	43.4925	3.14048	11.4031
ENSG00000123612	ACVR1C	1.83655	0.00140614	0.331039	up	1.01166	0.211254	1.13548	1.43802	0.461479	0.339996	0.17017	0.123598
ENSG00000023171	GRAMD1B	1.59328	0.0014516	0.336046	up	0.66628	0.153959	0.551197	0.368219	1.07942	0.209983	0.131602	0.120292
ENSG00000158859	ADAMTS4	-1.83679	0.00153378	0.347535	down	3.58006	13.0457	2.49484	1.54727	6.69807	20.452	7.07498	11.61
ENSG00000170745	KCNS3	-1.44274	0.00155127	0.347535	down	4.95919	13.6528	5.76821	7.19937	1.91	6.093	15.9703	18.895
ENSG00000160161	CILP2	-4.09245	0.0016275	0.358824	down	0.109961	3.4817	0.142495	0.187388	0	10.1739	0.0289971	0.242208
ENSG00000093072	ADA2	1.86001	0.00176081	0.378085	up	2.63231	0.652684	4.65218	2.12735	1.11742	0.870271	0.586627	0.501154
ENSG00000284791	AC078864.2	-2.18679	0.00176929	0.378085	down	0.368593	2.03346	0.543766	0.455448	0.106564	1.68735	3.77569	0.637335
ENSG00000165457	FOLR2	2.48423	0.00184726	0.388764	up	7.98673	1.34526	18.5319	2.96294	2.4653	1.67231	1.26802	1.09544
ENSG00000205678	TECRL	-1.89182	0.00189606	0.393079	down	3.38642	12.8382	2.46389	1.64327	6.0521	14.1059	3.70594	20.7029
ENSG00000129538	RNASE1	1.89355	0.00201361	0.41131	up	95.8064	25.7126	186.403	50.9559	50.0607	22.9161	27.2974	26.9242
ENSG00000198881	ASB12	-1.34728	0.00205732	0.414147	down	5.42082	13.9467	6.22526	7.08246	2.95474	6.23319	18.4119	17.195
ENSG00000164161	HHIP	-2.81991	0.00212194	0.418401	down	0.108039	1.369	0.151405	0.13625	0.0364607	4.00905	0.071549	0.0263996
ENSG00000105609	LILRB5	2.5024	0.00213869	0.418401	up	3.33657	0.506498	8.33541	1.26018	0.414134	0.480502	0.489999	0.548994
ENSG00000171819	ANGPTL7	-3.43223	0.00221531	0.420509	down	0.973559	11.4886	0.616815	1.31935	0.984512	33.6002	0.534972	0.330656
ENSG00000089250	NOS1	-1.21173	0.00225046	0.420509	down	2.76139	6.52741	4.20465	2.43656	1.64298	10.4267	5.19352	3.96201
ENSG00000127241	MASP1	-1.35051	0.00229541	0.420509	down	0.401623	1.17915	0.615792	0.386268	0.202811	2.15541	0.948579	0.433455
ENSG00000203710	CR1	2.27596	0.00231088	0.420509	up	3.75488	0.695934	6.11047	4.64701	0.507146	1.24414	0.363548	0.480118
ENSG00000248592	TMEM110-MUSTN1	2.49403	0.00231444	0.420509	up	2.77945	0.41113	4.54568	3.61435	0.178317	0.376834	0.620643	0.235913
ENSG00000157330	C1orf158	-1.56457	0.00235415	0.420509	down	0.00993398	0.225173	0	0	0.0298019	0.228697	0.438718	0.00810375
ENSG00000154930	ACSS1	-1.55295	0.00236139	0.420509	down	2.10868	6.3806	2.54173	1.87418	1.91012	4.41071	1.75298	12.9781
ENSG00000139330	KERA	-4.60096	0.00241663	0.424898	down	0.207209	7.35522	0.457529	0.10788	0.056218	21.8709	0	0.194772
ENSG00000142661	MYOM3	-1.60809	0.00258617	0.443048	down	15.8701	48.5845	20.0412	6.8356	20.7333	56.9572	16.8488	71.9476
ENSG00000170571	EMB	2.2309	0.00260727	0.443048	up	6.26868	1.25669	13.3232	4.14257	1.34021	1.85506	1.32314	0.59188
ENSG00000161267	BDH1	-1.39174	0.00261555	0.443048	down	0.299192	0.947457	0.280155	0.242397	0.375023	1.40534	0.400019	1.03701
ENSG00000169432	SCN9A	1.99154	0.00266454	0.44591	up	1.15102	0.214594	2.58216	0.662093	0.208801	0.228116	0.227035	0.188632
ENSG00000151632	AKR1C2	2.3023	0.0028609	0.473069	up	17.1286	3.39291	5.84388	4.09989	41.4419	3.63564	3.49209	3.05101
ENSG00000156968	MPV17L	2.15549	0.00295288	0.48123	up	1.4845	0.255652	0.32368	2.88445	1.24537	0.0925154	0.372614	0.301826
ENSG00000060718	COL11A1	-3.12482	0.00297954	0.48123	down	0.228515	2.76563	0.354456	0.273806	0.0572813	8.14048	0.102486	0.0539237
ENSG00000204388	HSPA1B	-1.56064	0.00324974	0.514912	down	259.53	765.77	395.721	143.046	239.823	1519.63	281.651	496.025
ENSG00000149294	NCAM1	-1.41104	0.00328184	0.514912	down	0.62284	1.82224	1.00026	0.350859	0.517403	3.76479	0.867513	0.834419
ENSG00000133800	LYVE1	2.10496	0.00331305	0.514912	up	29.7052	6.82848	62.7539	18.6621	7.69965	4.2144	8.73996	7.53106
ENSG00000151729	SLC25A4	-1.11306	0.00334548	0.514912	down	54.9208	118.912	47.0842	69.9232	47.7549	104.779	136.113	115.844
ENSG00000179029	TMEM107	1.78389	0.00337343	0.514912	up	3.9377	1.07254	2.40135	2.34052	7.07124	1.08542	1.01428	1.11792
ENSG00000170439	METTL7B	2.23724	0.00347095	0.516432	up	3.88307	0.744777	4.66983	1.87099	5.1084	0.381491	1.38095	0.471892
ENSG00000254709	IGLL5	2.95825	0.00348797	0.516432	up	3.10067	0.311832	6.20662	0.488865	2.60652	0.471163	0.424873	0.039461
ENSG00000054690	PLEKHH1	1.51366	0.00349493	0.516432	up	0.587935	0.140929	0.595446	0.355873	0.812486	0.103806	0.178355	0.140625
ENSG00000011052	NME1-NME2	4.4608	0.00365153	0.530984	up	12.1649	0.45697	2.32534	4.53324	29.6362	0	1.37091	0
ENSG00000224389	C4B	2.70638	0.00366987	0.530984	up	6.57249	0.922318	16.8359	0.451958	2.42966	1.13276	0.498309	1.13588
ENSG00000141469	SLC14A1	2.13324	0.0037255	0.533477	up	1.08835	0.17088	0.15304	1.50583	1.6062	0.309363	0.151612	0.0516638
ENSG00000178381	ZFAND2A	-1.53304	0.00400411	0.561788	down	1.4919	4.50688	1.61688	1.69401	1.16481	9.04214	1.82655	2.65195
ENSG00000108691	CCL2	-1.31626	0.00409147	0.568305	down	18.9952	47.4507	11.0159	18.9932	26.9765	63.5795	45.7472	33.0255
ENSG00000100079	LGALS2	2.86788	0.00417896	0.570626	up	1.15976	0.0725719	1.13215	2.10407	0.243064	0	0.217716	0
ENSG00000277957	SENP3-EIF4A1	-2.38046	0.0042275	0.570626	down	0.215221	1.54136	0.465666	0.145048	0.034948	0.121486	0.541529	3.96108
ENSG00000136244	IL6	-1.87257	0.00424261	0.570626	down	7.77418	28.7341	2.9811	3.40428	16.9372	28.0565	15.8325	42.3134
ENSG00000244731	C4A	2.65341	0.00427251	0.570626	up	6.53234	0.954169	16.8288	0.491406	2.27684	0.912873	0.574569	1.37506
ENSG00000119862	LGALSL	-1.16305	0.00434676	0.575014	down	3.45349	7.85734	2.12946	5.33784	2.89318	8.25261	9.26489	6.05452
ENSG00000174473	GALNTL6	1.82139	0.00440359	0.577037	up	0.414607	0.0456069	1.00102	0.12177	0.121032	0.0815654	0.0443681	0.0108873
ENSG00000120053	GOT1	-1.1183	0.00451908	0.577308	down	24.7048	53.7489	17.5497	34.675	21.8896	58.9938	57.7989	44.4539
ENSG00000095303	PTGS1	1.72575	0.00453377	0.577308	up	2.11784	0.570547	2.90735	2.64558	0.800597	0.82196	0.475673	0.41401
ENSG00000125730	C3	2.18326	0.00454523	0.577308	up	67.9855	14.8909	159.676	19.8981	24.3823	12.032	17.1974	15.4434
ENSG00000130035	GALNT8	1.83118	0.00462919	0.577308	up	0.316205	0.0169682	0.64819	0.300425	0	0.0216157	0.0123922	0.0168967
ENSG00000131238	PPT1	1.63374	0.00464051	0.577308	up	6.64211	2.07266	9.4798	7.97099	2.47554	1.70527	1.79552	2.71718
ENSG00000080824	HSP90AA1	-1.21716	0.00465504	0.577308	down	43.7091	101.751	51.4181	30.4451	49.2642	162.5	60.2472	82.5065
ENSG00000181092	ADIPOQ	2.49636	0.00471098	0.579075	up	28.507	4.96984	27.1947	56.8817	1.44457	5.20651	5.18711	4.5159
ENSG00000255112	CHMP1B	1.80477	0.00478603	0.58314	up	78.7589	22.4716	21.5625	96.2715	118.443	22.7014	23.0892	21.6241
ENSG00000166148	AVPR1A	-1.3393	0.0048564	0.58606	down	4.13769	10.6226	3.17893	4.53076	4.70337	20.2104	6.34049	5.31685
ENSG00000138435	CHRNA1	2.15995	0.00489824	0.58606	up	21.9372	4.83112	13.4364	10.4868	41.8884	1.90423	10.5021	2.08701
ENSG00000198805	PNP	-1.14297	0.00495713	0.58606	down	3.81834	8.55306	2.83288	3.32897	5.29318	10.1964	6.19033	9.27244
ENSG00000137801	THBS1	-1.26025	0.00497877	0.58606	down	19.8676	47.7298	24.0155	21.5165	14.0708	80.3867	18.5346	44.2683
ENSG00000266302	AC098850.3	2.27603	0.00505853	0.590445	up	1.36206	0.201864	3.08368	0.13303	0.869473	0.384921	0.138196	0.082474
ENSG00000182985	CADM1	-1.21627	0.00526101	0.601257	down	0.79385	1.97681	1.30185	0.559941	0.51976	1.43161	0.793401	3.70543
ENSG00000174697	LEP	3.26139	0.00526997	0.601257	up	6.62132	0.600934	0.894089	18.8431	0.126793	0.821997	0.756937	0.223869
ENSG00000182578	CSF1R	2.2752	0.00528102	0.601257	up	11.4049	2.27674	27.8946	4.47998	1.8402	1.75152	2.6465	2.4322
ENSG00000120694	HSPH1	-1.56032	0.00551595	0.622576	down	5.35092	15.9758	6.10462	3.50018	6.44797	33.8891	4.74328	9.29505
ENSG00000129170	CSRP3	-1.66313	0.00555791	0.622576	down	158.955	503.633	328.026	65.6037	83.2369	174.77	245.029	1091.1
ENSG00000110324	IL10RA	1.70711	0.00569321	0.630531	up	3.17946	0.904414	5.77961	2.90689	0.851896	0.976034	0.881491	0.855716
ENSG00000072694	FCGR2B	2.15947	0.0057379	0.630531	up	2.46322	0.473748	5.73525	1.14405	0.510345	0.439558	0.741981	0.239704
ENSG00000010610	CD4	1.92891	0.00581051	0.630531	up	5.12335	1.2718	10.4728	3.76936	1.1279	1.01771	1.15113	1.64655
ENSG00000062282	DGAT2	1.48286	0.00585912	0.630877	up	2.71807	0.908247	2.06455	3.94562	2.14404	1.31397	0.509646	0.901124
ENSG00000118298	CA14	-1.92964	0.00592548	0.633115	down	0.0656121	0.530915	0.151806	0.0450301	0	1.10048	0.41301	0.0792577
ENSG00000161513	FDXR	1.82039	0.00603435	0.639825	up	2.79722	0.720332	1.74202	3.49541	3.15424	0.357409	1.37649	0.427091
ENSG00000047457	CP	2.17302	0.00618442	0.645877	up	3.49914	0.698094	8.7671	0.885524	0.844796	0.621836	0.82158	0.650866
ENSG00000163734	CXCL3	-2.07934	0.00634177	0.6557	down	0.609825	2.89983	0.253649	0.591563	0.984262	0.747872	1.21683	6.73478
ENSG00000185669	SNAI3	-1.52585	0.00637289	0.6557	down	1.01923	3.1229	1.33043	1.39908	0.328189	3.22844	4.3093	1.83096
ENSG00000182177	ASB18	-1.27756	0.00652026	0.659884	down	0.0831828	0.344086	0.161117	0.02713	0.0613009	0.31715	0.153533	0.561576
ENSG00000181019	NQO1	1.66298	0.00652791	0.659884	up	9.34831	2.88364	3.69786	6.67769	17.6694	3.23986	2.64155	2.76951
ENSG00000180354	MTURN	-1.53224	0.0065706	0.659884	down	3.4906	10.2852	3.10968	4.34335	3.01877	18.9589	1.70008	10.1967
ENSG00000172901	LVRN	1.86163	0.00660359	0.659884	up	0.893707	0.173433	0.898395	1.61292	0.169803	0.16579	0.216104	0.138405
ENSG00000115221	ITGB6	-1.01279	0.00666578	0.66134	down	6.58898	13.3971	10.4196	4.19874	5.14859	14.3008	18.1324	7.75803
ENSG00000106565	TMEM176B	2.04439	0.00684385	0.674192	up	12.9675	3.06787	29.4146	6.53455	2.9532	2.30662	3.26801	3.62897
ENSG00000198959	TGM2	-1.82729	0.00691239	0.675958	down	9.30712	33.2831	13.8065	4.72994	9.38498	10.2787	7.23109	82.3394
ENSG00000184113	CLDN5	-1.41597	0.00695911	0.675958	down	1.55976	4.32891	1.5085	0.898617	2.27218	1.61213	3.79427	7.58032
ENSG00000138759	FRAS1	-1.13834	0.00703035	0.678136	down	0.67384	1.60343	1.26983	0.49062	0.261068	2.79475	1.21877	0.796779
ENSG00000099624	ATP5F1D	-1.12852	0.00711141	0.681224	down	13.5453	29.7333	10.7004	23.9762	5.95932	26.6238	32.6082	29.9679
ENSG00000160255	ITGB2	1.67063	0.00724184	0.688967	up	8.84369	2.70935	9.0577	14.6857	2.7877	3.89059	2.12006	2.1174
ENSG00000072210	ALDH3A2	1.90688	0.00736177	0.689611	up	15.8582	4.15555	5.89546	5.66571	36.0134	4.62048	3.81488	4.03128
ENSG00000154645	CHODL	-2.70504	0.00741139	0.689611	down	0.269698	2.31071	0.26421	0.142718	0.402166	6.67154	0.0794878	0.181111
ENSG00000090857	PDPR	1.55947	0.00742447	0.689611	up	7.08998	2.33939	12.175	4.37542	4.71955	2.90265	1.26356	2.85197
ENSG00000187288	CIDEC	2.596	0.00744721	0.689611	up	11.5672	1.82971	8.19196	26.1558	0.353701	2.01111	2.18699	1.29104
ENSG00000078018	MAP2	-1.22984	0.00778275	0.706551	down	0.32548	0.897923	0.392461	0.208797	0.375181	1.6764	0.683544	0.33382
ENSG00000268975	MIA-RAB4B	1.87838	0.00790581	0.712777	up	0.658	0.106167	0.262553	0.879491	0.831957	0.099946	0.183675	0.034881
ENSG00000171885	AQP4	-1.34558	0.00795396	0.712777	down	2.95579	7.66572	5.29419	2.42361	1.14956	9.97541	11.2522	1.76955
ENSG00000006062	MAP3K14	1.45073	0.00811043	0.72214	up	7.34303	2.62292	5.36762	5.53181	11.1297	1.66532	2.53316	3.67029
ENSG00000131771	PPP1R1B	1.71176	0.00835261	0.738966	up	0.501209	0.083541	0.804175	0.623393	0.076057	0.0880244	0.0763005	0.0862981
ENSG00000147255	IGSF1	-1.87361	0.00860016	0.756052	down	0.127812	0.734814	0.186223	0.0807858	0.116427	2.00137	0.0715333	0.131543
ENSG00000108946	PRKAR1A	1.70582	0.00874012	0.758322	up	58.5106	17.8669	36.3612	55.3013	83.8693	10.0208	33.8582	9.72179
ENSG00000141579	ZNF750	2.83448	0.00875292	0.758322	up	1.3789	0.107337	0	1.43917	2.69754	0.119023	0.150142	0.052847
ENSG00000068024	HDAC4	1.7108	0.00884092	0.758322	up	17.7161	5.34265	6.01868	19.9722	27.1573	8.02226	5.22565	2.78003
ENSG00000164591	MYOZ3	-1.05145	0.00894326	0.758322	down	5.63806	11.7927	10.2552	4.31381	2.34518	16.8991	11.3222	7.15689
ENSG00000187134	AKR1C1	2.11158	0.00907733	0.759543	up	11.5695	2.60025	3.5994	3.00296	28.1062	1.77264	1.5599	4.4682
ENSG00000198759	EGFL6	3.65311	0.0091431	0.760465	up	2.84258	0.133901	1.04116	7.46712	0.0194618	0	0.019907	0.381797
ENSG00000135144	DTX1	2.01165	0.00926943	0.766383	up	1.11617	0.201598	1.98344	1.18852	0.176551	0.188627	0.273048	0.143119
ENSG00000147138	GPR174	1.3933	0.00967881	0.78055	up	0.306431	0.0547252	0.547856	0.247016	0.12442	0.072264	0.0654247	0.0264869
ENSG00000147485	PXDNL	2.33886	0.0096972	0.78055	up	2.20236	0.3551	5.86478	0.323964	0.418331	0.470861	0.335143	0.259297
ENSG00000140022	STON2	1.53934	0.00972175	0.78055	up	8.78097	2.95543	6.66431	3.55376	16.1249	2.88912	2.98491	2.99226
ENSG00000128271	ADORA2A	1.62825	0.00983021	0.782851	up	0.816189	0.19637	0.795761	0.965753	0.687053	0.256246	0.147277	0.185588
ENSG00000184489	PTP4A3	-1.06939	0.00987524	0.782851	down	24.8372	52.2318	36.8556	25.1378	12.5183	28.3163	40.2876	88.0914
ENSG00000132002	DNAJB1	-1.49759	0.0100603	0.782851	down	25.0438	70.8984	19.5718	16.541	39.0185	145.804	30.0735	36.8176
ENSG00000132514	CLEC10A	2.34403	0.010145	0.782851	up	4.62488	0.830608	11.4773	1.6548	0.742526	0.371946	1.14259	0.977284
ENSG00000240583	AQP1	1.38404	0.0102088	0.782851	up	76.9078	29.4052	95.6526	58.1589	76.9119	28.5482	21.2719	38.3955
ENSG00000128815	WDFY4	1.67558	0.0103377	0.782851	up	1.7543	0.480472	2.05366	2.88059	0.328647	0.638977	0.288304	0.514135
ENSG00000241186	TDGF1	-2.00982	0.010363	0.782851	down	0.0579058	0.535937	0.141946	0	0.0317715	0.0183531	0.351723	1.23773
ENSG00000160179	ABCG1	1.43277	0.0104291	0.782851	up	7.57846	2.74424	13.3399	4.7932	4.60227	2.86252	3.15722	2.21299
ENSG00000133794	ARNTL	1.377	0.0104831	0.782851	up	2.92884	1.06616	3.51501	3.75684	1.51468	0.953408	0.904776	1.3403
ENSG00000104332	SFRP1	2.0613	0.0108217	0.795766	up	7.27463	1.66696	13.169	7.74042	0.914458	1.98759	2.39081	0.622487
ENSG00000185100	ADSSL1	-1.01389	0.0108461	0.795766	down	15.4643	31.3298	14.2757	24.5089	7.6084	29.7815	38.2573	25.9508
ENSG00000005249	PRKAR2B	1.85865	0.0108605	0.795766	up	8.16828	2.17985	5.97236	16.9589	1.57354	2.87225	2.17728	1.49003
ENSG00000166819	PLIN1	2.33834	0.0108852	0.795766	up	36.7075	7.17822	29.9051	78.577	1.64022	6.94229	8.4866	6.10578
ENSG00000197713	RPE	1.43038	0.0111381	0.805774	up	3.69296	1.30731	5.40886	2.57869	3.09133	1.38593	1.08469	1.45132
ENSG00000115380	EFEMP1	1.91187	0.0112587	0.808075	up	28.9269	7.61383	65.4466	14.123	7.21098	6.87851	6.39115	9.57184
ENSG00000177675	CD163L1	2.34386	0.0113502	0.808075	up	2.53386	0.418825	6.87066	0.363992	0.366929	0.41135	0.451608	0.393518
ENSG00000198431	TXNRD1	1.8495	0.0113865	0.808075	up	23.0629	6.32745	5.34981	12.1317	51.7072	5.59762	6.12202	7.2627
ENSG00000128655	PDE11A	1.99462	0.0114026	0.808075	up	5.70342	1.35628	1.40921	4.06268	11.6384	0.404112	2.82897	0.835756
ENSG00000002933	TMEM176A	1.96411	0.011654	0.817853	up	4.76206	1.14613	11.0293	1.86237	1.39449	0.76633	1.08789	1.58417
ENSG00000105967	TFEC	1.66969	0.0116584	0.817853	up	0.682103	0.145831	1.26315	0.609587	0.173577	0.210436	0.150474	0.0765827
ENSG00000101187	SLCO4A1	-1.0145	0.012297	0.841218	down	1.09363	2.31137	0.988882	1.23742	1.05459	1.9462	1.87772	3.11019
ENSG00000168685	IL7R	1.45246	0.0124248	0.841218	up	1.34276	0.427182	0.891422	1.78562	1.35124	0.425357	0.300254	0.555935
ENSG00000095585	BLNK	1.62535	0.0124251	0.841218	up	0.584269	0.121794	0.912974	0.206282	0.633552	0.125588	0.103169	0.136624
ENSG00000119927	GPAM	1.73074	0.0124857	0.841218	up	8.76012	2.56953	5.96098	18.1166	2.20281	2.96548	2.77537	1.96773
ENSG00000165029	ABCA1	1.3422	0.0125365	0.841218	up	22.2178	8.70256	31.903	20.286	14.4645	8.27141	9.45942	8.37686
ENSG00000177508	IRX3	-1.6341	0.012988	0.861693	down	1.15674	3.80083	0.346733	2.48313	0.640356	2.30346	7.38334	1.71569
ENSG00000198668	CALM1	1.50229	0.0130413	0.861693	up	59.9474	21.0963	43.7586	91.0398	45.0438	10.2479	26.2876	26.7533
ENSG00000278272	HIST1H3C	2.16375	0.0130724	0.861693	up	5.52103	1.15447	3.97304	1.79002	10.8	1.13213	1.36141	0.969879
ENSG00000135047	CTSL	-1.53489	0.0130898	0.861693	down	19.5011	56.6973	28.7572	12.8403	16.9058	15.3442	17.3652	137.382
ENSG00000100979	PLTP	2.42953	0.0132793	0.861913	up	41.7117	7.66135	111.645	8.59769	4.89253	4.90545	6.96477	11.1138
ENSG00000104635	SLC39A14	-1.65578	0.0135316	0.863246	down	4.66921	14.9275	6.5283	2.9033	4.57603	4.44381	2.66911	37.6694
ENSG00000134962	KLB	1.89645	0.0135829	0.863246	up	0.778384	0.135937	0.823785	1.44302	0.06835	0.165457	0.153369	0.088986
ENSG00000211445	GPX3	1.5946	0.0135848	0.863246	up	35.1613	11.5755	20.0203	67.3032	18.1603	8.60497	9.39485	16.7266
ENSG00000105647	PIK3R2	2.4626	0.0135984	0.863246	up	3.44884	0.543827	4.99513	2.39713	2.95427	1.51264	0.0905536	0.0282924
ENSG00000110448	CD5	1.5499	0.0139071	0.870132	up	0.429003	0.0806727	0.663427	0.291215	0.332366	0.048181	0.161305	0.032532
ENSG00000165025	SYK	1.49558	0.014087	0.875103	up	4.56909	1.55584	6.45551	5.85442	1.39736	1.97131	1.26093	1.43528
ENSG00000148926	ADM	1.85244	0.0141125	0.875103	up	19.4468	5.31296	5.37902	8.43718	44.5241	5.74467	2.59687	7.59733
ENSG00000113296	THBS4	-2.0348	0.0142938	0.882406	down	39.1638	160.79	85.6063	15.6752	16.2101	436.843	21.9826	23.5441
ENSG00000163815	CLEC3B	1.95309	0.014375	0.883493	up	80.0271	20.5939	179.703	41.821	18.5577	31.6291	20.5765	9.57604
ENSG00000143171	RXRG	-1.24544	0.0145314	0.888529	down	3.26865	7.88675	1.71588	6.09808	1.99199	8.3845	11.9901	3.2857
ENSG00000166123	GPT2	-1.03399	0.0145849	0.888529	down	3.59139	7.4588	2.3522	3.39299	5.02896	8.5852	4.28469	9.5065
ENSG00000171860	C3AR1	2.13401	0.0147535	0.893381	up	5.32101	1.13504	10.4699	4.73959	0.753525	0.39297	1.21279	1.79934
ENSG00000182326	C1S	1.63229	0.0148524	0.893381	up	22.926	7.32765	47.0171	13.0245	8.73635	8.28419	7.54135	6.15741
ENSG00000176170	SPHK1	-1.12963	0.0149218	0.893381	down	0.950529	2.19859	1.4929	0.477426	0.881259	1.78596	1.11768	3.69212
ENSG00000172348	RCAN2	-1.18527	0.0153066	0.903529	down	6.6246	15.1922	4.96604	4.60507	10.3027	22.5249	16.898	6.1537
ENSG00000166147	FBN1	2.1045	0.0154476	0.903529	up	59.8337	13.8365	147.654	23.209	8.63784	13.6249	12.7533	15.1312
ENSG00000249437	NAIP	1.39142	0.0154521	0.903529	up	1.96284	0.68633	3.15328	1.99763	0.737599	0.771957	0.727309	0.559724
ENSG00000276368	HIST1H2AJ	2.72258	0.0154905	0.903529	up	4.36119	0.575883	3.04857	1.44009	8.59491	0.8391	0.888549	0
ENSG00000106538	RARRES2	1.63727	0.0155008	0.903529	up	6.99792	2.18173	8.60203	10.1516	2.24017	1.42324	3.05479	2.06718
ENSG00000276345	AC004556.1	-1.43944	0.0155245	0.903529	down	4.08148	11.2409	2.46706	6.86887	2.90853	4.31537	21.3792	8.02799
ENSG00000163624	CDS1	1.49726	0.0155611	0.903529	up	0.288617	0.0376583	0.522629	0.283716	0.059507	0	0.057708	0.055267
ENSG00000106066	CPVL	1.77867	0.0156117	0.903529	up	6.82963	1.91965	14.8273	3.97177	1.68977	1.32554	2.27492	2.15849
ENSG00000184357	HIST1H1B	2.05824	0.0158088	0.907739	up	6.89501	1.57957	6.02454	1.89727	12.7632	2.27067	1.60341	0.864609
ENSG00000145824	CXCL14	2.34437	0.0158734	0.907739	up	62.5961	12.2457	144.436	29.364	13.9886	5.14562	28.654	2.93747
ENSG00000131730	CKMT2	-1.03993	0.0161721	0.915641	down	47.3674	97.4991	24.8086	65.4178	51.8756	88.1807	89.3597	114.957
ENSG00000169896	ITGAM	1.59906	0.016491	0.926658	up	7.14142	2.29033	10.1264	9.49386	1.80405	3.56146	1.54277	1.76677
ENSG00000124253	PCK1	1.88154	0.0165451	0.926658	up	1.48523	0.33022	2.35069	1.90197	0.203024	0.42056	0.108985	0.461115
ENSG00000271503	CCL5	1.88863	0.0167963	0.935741	up	7.24538	1.88371	4.05853	15.0386	2.639	3.32752	1.54866	0.774954
ENSG00000131389	SLC6A6	1.43225	0.0168967	0.935741	up	11.8052	4.31153	5.73778	9.19751	20.4804	5.08425	2.88882	4.96151
ENSG00000103353	UBFD1	1.368	0.0169436	0.935741	up	10.2722	3.91847	7.49767	12.2008	11.1181	1.9462	6.04491	3.7643
ENSG00000161642	ZNF385A	1.59883	0.0171418	0.935741	up	5.34942	1.69909	3.77836	2.38407	9.88582	2.43969	0.73597	1.92162
ENSG00000165323	FAT3	-1.15314	0.0172766	0.935741	down	0.211935	0.593733	0.30415	0.23781	0.0938437	0.987045	0.719012	0.0751419
ENSG00000165168	CYBB	1.8121	0.017299	0.935741	up	24.3759	6.87013	45.9109	20.763	6.45373	4.2678	3.66097	12.6816
ENSG00000131747	TOP2A	1.57941	0.0174816	0.935741	up	0.42099	0.0743332	0.613916	0.0610448	0.588009	0.0714208	0.0208726	0.130706
ENSG00000134121	CHL1	1.53794	0.0174929	0.935741	up	1.07688	0.305291	2.10414	0.880019	0.246486	0.279883	0.310355	0.325636
ENSG00000134986	NREP	-1.13252	0.0175744	0.935741	down	1.18307	2.71301	2.61804	0.389508	0.541657	3.7012	3.33492	1.10291
ENSG00000090659	CD209	2.27679	0.0175805	0.935741	up	2.62314	0.461936	6.61304	0.736428	0.519942	0.141908	0.272435	0.971465
ENSG00000284691	AC073111.5	1.39774	0.0176149	0.935741	up	0.348004	0.0700282	0.307919	0.619955	0.116138	0.0394744	0.100128	0.0704816
ENSG00000145416	MARCHF1	1.54215	0.0178386	0.939026	up	1.07905	0.304855	2.16393	0.777321	0.295911	0.263857	0.331932	0.318776
ENSG00000119508	NR4A3	-1.25584	0.0180518	0.946187	down	3.04955	7.42131	1.61852	5.67478	1.85535	13.0301	6.72021	2.51359
ENSG00000179344	HLA-DQB1	1.79666	0.0181833	0.949309	up	6.33508	1.75228	10.9311	6.35871	1.71544	0.654949	1.20219	3.3997
ENSG00000184588	PDE4B	-1.40052	0.01826	0.949309	down	8.82509	23.4619	15.5739	4.33478	6.56662	5.60023	10.7726	54.0129
ENSG00000167723	TRPV3	1.6373	0.0183337	0.949309	up	1.10411	0.287068	0.81283	0.152684	2.3468	0.306425	0.305953	0.248826
ENSG00000007933	FMO3	1.8816	0.018439	0.949309	up	2.09971	0.496963	3.57324	2.08912	0.636788	0.54479	0.799854	0.146247
ENSG00000181847	TIGIT	1.1642	0.0184531	0.949309	up	0.194231	0.0312894	0.323515	0.226482	0.0326957	0.0564982	0.0297293	0.00764061
ENSG00000170962	PDGFD	1.95469	0.0186552	0.956167	up	6.61745	1.63294	15.8913	2.62902	1.33205	1.92275	2.18974	0.786341
ENSG00000000005	TNMD	-3.84629	0.0187882	0.956484	down	1.81541	27.4492	0.67973	4.76649	0	80.988	0.501054	0.858696
ENSG00000005961	ITGA2B	2.04897	0.0188649	0.956484	up	1.37906	0.257426	0.097373	3.45037	0.589454	0.395917	0.210464	0.165895
ENSG00000248746	ACTN3	-1.55757	0.0188717	0.956484	down	59.4829	175.287	48.7861	117.191	12.4712	65.7978	384.5	75.564
ENSG00000274267	HIST1H3B	2.16526	0.0189731	0.956484	up	7.20702	1.52904	6.12884	1.56899	13.9232	2.27009	1.64155	0.675497
ENSG00000146592	CREB5	1.32758	0.0190139	0.956484	up	4.26128	1.63769	6.88186	3.34255	2.55942	2.16279	1.82647	0.923796
ENSG00000134955	SLC37A2	2.25802	0.0192159	0.956484	up	1.74774	0.286286	4.31809	0.690179	0.234955	0.047713	0.201067	0.610079
ENSG00000007968	E2F2	1.53294	0.0192755	0.956484	up	0.462899	0.0945227	0.0943897	0.842786	0.451522	0.17487	0.0659201	0.0427779
ENSG00000164509	IL31RA	1.30433	0.0194289	0.956484	up	0.264703	0.0476714	0.201463	0.0345772	0.558068	0.0680333	0.0420936	0.0328875
ENSG00000114395	CYB561D2	1.72856	0.0194958	0.956484	up	2.03654	0.544708	1.84855	2.23051	2.03058	0.224056	0.673858	0.736211
ENSG00000166407	LMO1	-1.23116	0.0196819	0.956484	down	1.18673	2.92066	1.44897	1.41843	0.692784	1.38669	4.41451	2.96079
ENSG00000070882	OSBPL3	1.39133	0.0197052	0.956484	up	4.04486	1.48008	2.37162	2.86919	6.89377	2.05018	0.745601	1.64446
ENSG00000110077	MS4A6A	1.65888	0.0197095	0.956484	up	4.22395	1.26933	8.73861	2.94099	0.992253	1.03373	1.12326	1.651
ENSG00000275379	HIST1H3I	1.9872	0.019883	0.956484	up	2.90594	0.658185	3.72027	2.01341	2.98414	0.54764	0.455753	0.971161
ENSG00000185442	FAM174B	1.27444	0.0198964	0.956484	up	3.39064	1.34299	2.74109	3.76359	3.66726	0.802731	1.80395	1.42227
ENSG00000168004	HRASLS5	1.74909	0.0199698	0.956484	up	0.893274	0.195488	0.954657	1.53271	0.192457	0.148726	0.171217	0.266522
ENSG00000137441	FGFBP2	2.32621	0.0202073	0.961884	up	2.18037	0.354724	3.14236	3.19878	0.199971	0.118306	0.72025	0.225616
ENSG00000243649	CFB	1.8779	0.0202234	0.961884	up	3.26952	0.816774	7.61468	0.873205	1.32067	0.578971	0.495346	1.376
ENSG00000197405	C5AR1	1.78148	0.0205565	0.961884	up	6.75238	1.89326	1.6339	15.9196	2.70363	1.45788	2.12179	2.10011
ENSG00000166106	ADAMTS15	1.60268	0.0205714	0.961884	up	3.13864	0.966367	6.27599	2.12501	1.01492	0.806067	0.648801	1.44423
ENSG00000206177	HBM	2.45654	0.0206336	0.961884	up	2.6977	0.409695	0.109974	4.09736	3.88577	0.474905	0.701651	0.0525283
ENSG00000180730	SHISA2	-1.151	0.0206527	0.961884	down	1.9077	4.35846	2.94648	2.36764	0.408971	2.40688	7.20585	3.46265
ENSG00000177674	AGTRAP	1.34529	0.021085	0.961884	up	6.43585	2.47234	6.09663	4.91539	8.29553	2.73294	1.28044	3.40366
ENSG00000143162	CREG1	1.19343	0.0210857	0.961884	up	26.1625	11.3836	25.7316	21.111	31.645	8.2353	12.7683	13.1473
ENSG00000077009	NMRK2	-1.06741	0.021217	0.961884	down	19.6679	41.327	41.6678	8.02582	9.30999	58.4021	16.7555	48.8234
ENSG00000181234	TMEM132C	1.81595	0.021336	0.961884	up	1.99822	0.495932	2.02756	3.74678	0.220329	0.589226	0.527668	0.370902
ENSG00000164708	PGAM2	-1.1747	0.0214508	0.961884	down	209.117	472.199	152.141	416.426	58.785	429.975	652.583	334.039
ENSG00000163638	ADAMTS9	-1.06526	0.0214675	0.961884	down	4.76652	10.0834	5.70206	2.48861	6.1089	11.6846	3.86162	14.7041
ENSG00000139970	RTN1	1.57298	0.0216904	0.968746	up	0.950705	0.253156	0.97091	1.6214	0.2598	0.271376	0.300439	0.187652
ENSG00000197629	MPEG1	1.65595	0.0221264	0.981903	up	15.0583	4.71014	27.7421	14.2595	3.17311	4.05586	3.13705	6.93752
ENSG00000258790	AL121594.1	-1.69969	0.0222638	0.98297	down	0.416919	1.57911	0.207125	0.715604	0.328029	0.124952	1.1341	3.47828
ENSG00000258555	SPECC1L-ADORA2A	-1.24271	0.022292	0.98297	down	0.101356	0.376494	0.204979	0.00364	0.095449	0.325444	0.414457	0.389582
ENSG00000205364	MT1M	-1.21653	0.0225633	0.988759	down	2.69512	6.39548	2.00248	2.14619	3.93669	7.7167	4.82589	6.64386
ENSG00000137814	HAUS2	-1.12379	0.0226743	0.988759	down	0.412943	1.0178	0.362146	0.421882	0.4548	0.706783	1.51164	0.834982
ENSG00000134755	DSC2	1.40175	0.0228822	0.988759	up	0.741771	0.218585	1.21813	0.797547	0.209635	0.204688	0.14138	0.309688
ENSG00000099864	PALM	1.44975	0.0229673	0.988759	up	5.50656	1.95248	9.57755	5.07932	1.8628	1.67649	2.722	1.45894
ENSG00000267740	AC024592.3	-1.54877	0.0229745	0.988759	down	0.057569	0.360994	0.00176004	0.0698448	0.101102	0.495714	0.0195374	0.567731
ENSG00000122121	XPNPEP2	2.30668	0.0230842	0.988759	up	2.02005	0.328513	5.41724	0.281851	0.361042	0.577084	0.259405	0.149051
ENSG00000122547	EEPD1	-1.03127	0.0231351	0.988759	down	6.04491	12.4591	6.53406	7.88002	3.72067	4.95359	7.86998	24.5539
ENSG00000196664	TLR7	2.00465	0.0232543	0.990803	up	1.08669	0.195718	2.49944	0.598441	0.162175	0.271414	0.265476	0.0502639
ENSG00000142583	SLC2A5	-1.46672	0.0235316	0.999552	down	3.861	10.8479	4.87043	1.38542	5.32715	3.90916	2.90099	25.7336
ENSG00000170775	GPR37	-1.11619	0.0238455	1	down	0.177418	0.501371	0.164884	0.226407	0.140964	0.741797	0.342502	0.419814
ENSG00000205362	MT1A	-2.07767	0.0238485	1	down	2.40449	10.472	0.788448	0.931938	5.49309	21.0416	3.07678	7.29775
ENSG00000180834	MAP6D1	-1.30235	0.0240114	1	down	1.22869	3.17694	2.19916	0.174091	1.31281	3.93627	3.24069	2.35385
ENSG00000162551	ALPL	2.10694	0.0240891	1	up	6.63602	1.46369	11.3892	7.96144	0.557369	3.12003	0.513796	0.75725
ENSG00000115884	SDC1	1.77615	0.0243675	1	up	0.574504	0.0969293	1.36751	0.06477	0.29123	0.100751	0.0561191	0.133918
ENSG00000126860	EVI2A	1.83822	0.0247362	1	up	6.08172	1.62882	3.88297	13.1518	1.21041	2.71442	0.879889	1.29214
ENSG00000013573	DDX11	-1.05554	0.0248486	1	down	0.540513	1.2313	0.945852	0.331771	0.343915	0.30802	1.54404	1.84185
ENSG00000163106	HPGDS	1.79945	0.0251143	1	up	1.1132	0.248533	2.26855	0.65384	0.4172	0.291046	0.294771	0.159782
ENSG00000169885	CALML6	1.70083	0.0251271	1	up	5.13716	1.511	5.33702	8.17425	1.9002	2.35943	1.78237	0.39119
ENSG00000104415	WISP1	-1.57882	0.0251985	1	down	0.194477	0.779681	0.278368	0.137291	0.167774	2.0724	0.156319	0.110321
ENSG00000183918	SH2D1A	1.87773	0.025481	1	up	0.573154	0.0831727	1.36627	0.301768	0.051422	0.132695	0.0996179	0.0172049
ENSG00000101916	TLR8	1.72603	0.0255229	1	up	2.58593	0.711912	1.74321	5.36329	0.65129	1.23648	0.584355	0.3149
ENSG00000143119	CD53	1.46109	0.0255625	1	up	9.54355	3.40271	8.12759	17.2351	3.26797	4.31886	2.38184	3.50742
ENSG00000091986	CCDC80	1.89141	0.0256416	1	up	18.9269	5.02858	46.5897	5.98423	4.2067	5.68441	5.98742	3.4139
ENSG00000178386	ZNF223	1.40409	0.0256582	1	up	0.521162	0.13471	0.277528	0.717264	0.568695	0.144527	0.158874	0.100729
ENSG00000039537	C6	1.79478	0.0256619	1	up	2.51661	0.654149	5.24167	1.95049	0.357668	0.542984	0.498216	0.921245
ENSG00000142794	NBPF3	1.42233	0.0257155	1	up	0.572029	0.15074	0.876086	0.372829	0.467174	0.265547	0.104171	0.0825029
ENSG00000138135	CH25H	-1.30591	0.0258	1	down	2.28946	5.80768	1.54136	1.52667	3.80036	10.9912	3.47509	2.95672
ENSG00000007908	SELE	-1.33086	0.0260294	1	down	5.96583	15.1587	2.48306	3.14448	12.2699	21.0444	7.80627	16.6254
ENSG00000242574	HLA-DMB	1.44559	0.0264553	1	up	3.27051	1.13745	6.17645	2.08114	1.55394	0.82671	1.59904	0.986608
ENSG00000081985	IL12RB2	1.59273	0.026741	1	up	2.03263	0.607059	3.21118	0.853749	2.03296	0.209368	0.723575	0.888234
ENSG00000142185	TRPM2	1.60031	0.0267946	1	up	0.898358	0.229264	1.79062	0.693076	0.211382	0.240515	0.287719	0.159557
ENSG00000106018	VIPR2	-1.22782	0.0269801	1	down	0.730706	1.84562	1.6048	0.320375	0.266943	1.7133	0.441184	3.38237
ENSG00000270885	RASL10B	-1.03899	0.0269841	1	down	2.42326	5.08477	1.7373	4.7816	0.750865	6.49496	3.75681	5.00254
ENSG00000184811	TUSC5	1.94266	0.0270221	1	up	5.16398	1.26935	3.59979	11.5762	0.315907	1.24474	1.23403	1.32928
ENSG00000172575	RASGRP1	1.3123	0.0270249	1	up	0.417336	0.10832	0.680763	0.361197	0.210047	0.119394	0.143714	0.061852
ENSG00000134917	ADAMTS8	-1.54053	0.0271391	1	down	0.324897	1.13603	0.698797	0.0443255	0.231568	2.34564	0.192502	0.869943
ENSG00000186628	FSD2	-1.02887	0.0271714	1	down	4.25936	8.79493	8.58691	3.12611	1.06506	7.90132	14.5707	3.9128
ENSG00000174807	CD248	2.0335	0.0274914	1	up	15.0282	3.59524	38.0869	5.38589	1.61183	2.789	3.06492	4.9318
ENSG00000004846	ABCB5	1.18701	0.0276429	1	up	0.164146	0.016016	0.213566	0.274972	0.00390016	0	0.0447379	0.00331008
ENSG00000108679	LGALS3BP	1.39384	0.0277751	1	up	19.2493	7.26339	37.7993	10.8773	9.07139	7.63998	6.81975	7.33045
ENSG00000149124	GLYAT	1.92695	0.0278652	1	up	0.495539	0.0566179	0.478489	0.991834	0.0162934	0.104405	0.0654486	0
ENSG00000113263	ITK	1.24723	0.0278653	1	up	0.473505	0.141592	0.62328	0.454203	0.343032	0.14232	0.189777	0.0926801
ENSG00000159212	CLIC6	-1.52915	0.0284186	1	down	0.384019	1.29695	0.836581	0.180019	0.135456	0.699041	0.166541	3.02527
ENSG00000118496	FBXO30	1.5386	0.028443	1	up	12.2557	4.15307	3.83482	5.79978	27.1326	3.59762	4.0489	4.8127
ENSG00000175489	LRRC25	1.5393	0.0287498	1	up	5.89924	1.96405	8.05114	7.89042	1.75615	2.31803	0.98384	2.59028
ENSG00000283378	BX088645.1	1.90635	0.0291688	1	up	2.72763	0.654318	1.47735	6.09194	0.613593	0.808094	0.56647	0.588391
ENSG00000115107	STEAP3	-1.05958	0.0292714	1	down	3.42196	7.24093	3.82917	3.42555	3.01117	2.36509	3.85479	15.5029
ENSG00000106785	TRIM14	1.797	0.0292922	1	up	1.6252	0.396463	3.41246	0.924677	0.538447	0.214485	0.146691	0.828213
ENSG00000138755	CXCL9	1.97687	0.0294933	1	up	2.30848	0.51185	2.58014	0.299953	4.04535	0.115703	1.00801	0.411837
ENSG00000198053	SIRPA	1.24809	0.029628	1	up	8.73405	3.61919	11.3557	10.1488	4.69762	2.47451	2.9535	5.42956
ENSG00000100505	TRIM9	1.04212	0.0296859	1	up	0.252149	0.0710089	0.277065	0.15567	0.323712	0.0994074	0.0571039	0.0565153
ENSG00000147256	ARHGAP36	2.33572	0.0297463	1	up	2.15823	0.347347	4.84645	1.13883	0.48941	0.0985765	0.91026	0.0332056
ENSG00000162704	ARPC5	1.52678	0.0298448	1	up	3.13248	1.02183	3.96791	4.9409	0.488623	0.904591	1.24875	0.912153
ENSG00000197253	TPSB2	2.0253	0.0298842	1	up	6.80723	1.59679	17.0702	1.94766	1.40378	0.914104	2.59183	1.28444
ENSG00000102287	GABRE	1.34617	0.02998	1	up	2.10586	0.767642	2.66027	3.04411	0.613201	0.798755	0.545832	0.958338
ENSG00000134899	ERCC5	1.29728	0.0301159	1	up	4.60643	1.81501	4.14362	5.72927	3.9464	0.778902	1.44214	3.22398
ENSG00000196872	KIAA1211L	1.45063	0.030995	1	up	2.21749	0.747878	1.0634	1.1578	4.43126	0.659717	0.469746	1.11417
ENSG00000198576	ARC	-1.53153	0.0312811	1	down	0.360813	1.23218	0.315584	0.232118	0.534737	2.50839	0.179427	1.00871
ENSG00000120262	CCDC170	1.65113	0.03142	1	up	0.699514	0.154558	1.21368	0.802513	0.0823438	0.211721	0.145023	0.106929
ENSG00000164442	CITED2	1.25878	0.0319199	1	up	42.8436	17.846	19.6969	48.9658	59.868	14.2255	22.1356	17.177
ENSG00000163131	CTSS	1.58685	0.0320222	1	up	25.3331	8.36665	24.6092	45.7686	5.62167	13.3587	4.79211	6.94911
ENSG00000122420	PTGFR	2.01444	0.0324355	1	up	4.86453	1.12877	12.9663	0.845631	0.781682	1.19757	0.819783	1.36897
ENSG00000137331	IER3	-1.02551	0.0324401	1	down	14.4798	29.5798	11.1051	8.35068	23.9837	17.3531	23.6955	47.6909
ENSG00000064886	CHI3L2	2.21274	0.0325228	1	up	1.26878	0.195277	3.44379	0.113824	0.248719	0.0908103	0.123866	0.371156
ENSG00000088882	CPXM1	2.63264	0.032694	1	up	5.1358	0.744265	14.3182	0.608807	0.480385	0.606543	0.077695	1.54856
ENSG00000158050	DUSP2	1.51051	0.032788	1	up	12.9728	4.48839	3.14765	9.37138	26.3994	5.52204	5.32263	2.62051
ENSG00000079435	LIPE	1.58884	0.0328141	1	up	6.07415	1.95253	3.1194	13.752	1.35102	1.77928	1.7646	2.31371
ENSG00000092009	CMA1	2.52829	0.0329726	1	up	3.41691	0.509636	9.21824	0.51762	0.514866	0.232272	1.10381	0.192826
ENSG00000163631	ALB	-1.2417	0.0330458	1	down	0.398976	1.07996	0.39306	0.423447	0.380421	2.09482	0.735481	0.409589
ENSG00000106484	MEST	1.7651	0.0330749	1	up	7.20328	2.04867	13.7191	6.89205	0.998666	2.92032	0.747207	2.4785
ENSG00000073969	NSF	1.17644	0.0338142	1	up	8.06448	3.51231	5.2721	6.8043	12.117	2.68705	2.93862	4.91125
ENSG00000130844	ZNF331	-1.06842	0.0341165	1	down	1.54019	3.33969	1.81364	0.73755	2.06938	5.63926	3.50433	0.87549
ENSG00000132854	KANK4	1.28247	0.0341355	1	up	0.374973	0.0952568	0.468946	0.376326	0.279648	0.192505	0.0670722	0.0261934
ENSG00000119938	PPP1R3C	-1.04733	0.0342551	1	down	58.5666	121.147	96.2194	60.9761	18.5043	100.3	223.747	39.3939
ENSG00000085117	CD82	1.33231	0.0343287	1	up	6.5599	2.54485	2.87043	4.06494	12.7443	2.3951	3.27186	1.9676
ENSG00000275713	HIST1H2BH	1.56337	0.0346387	1	up	0.706179	0.172779	0.66525	0.481404	0.971884	0.307921	0.03754	0.172876
ENSG00000148572	NRBF2	-1.09771	0.0346444	1	down	8.60641	18.533	7.29165	11.2701	7.25753	6.07989	9.30403	40.2152
ENSG00000161911	TREML1	2.30598	0.0346795	1	up	1.27108	0.177265	0.142742	3.04493	0.625573	0.319853	0.211943	0
ENSG00000166947	EPB42	1.87345	0.0347227	1	up	0.839789	0.156487	0.0441968	1.19275	1.28242	0.147778	0.293197	0.0284874
ENSG00000198848	CES1	1.71042	0.0348233	1	up	3.47265	0.991697	3.19148	6.71869	0.507784	1.44059	0.914147	0.620355
ENSG00000120256	LRP11	1.22457	0.0348377	1	up	4.71059	1.95857	7.4887	3.89439	2.74868	2.05695	2.22462	1.59414
ENSG00000164199	ADGRV1	1.67391	0.0349639	1	up	0.300293	0.0254531	0.863084	0.0330604	0.00473442	0	0.0634055	0.0129539
ENSG00000105610	KLF1	1.76436	0.0349758	1	up	0.751679	0.150697	0.034547	1.06959	1.1509	0.132757	0.191583	0.127751
ENSG00000188257	PLA2G2A	2.78546	0.035104	1	up	29.2154	4.15195	82.2094	4.18561	1.2511	0.963517	1.02612	10.4662
ENSG00000198625	MDM4	1.45329	0.0351616	1	up	4.15302	1.45315	9.03357	1.53141	1.8941	1.77133	1.25285	1.33526
ENSG00000130876	SLC7A10	1.54338	0.0357568	1	up	0.436664	0.0841188	0.493006	0.784369	0.0326179	0.0998546	0.0392359	0.113266
ENSG00000154415	PPP1R3A	-1.10061	0.0358046	1	down	36.6851	78.784	42.1757	50.4857	17.3938	55.1697	160.392	20.7906
ENSG00000173868	PHOSPHO1	1.70279	0.0358585	1	up	3.71466	1.07183	0.843817	8.41085	1.88931	1.59489	0.803587	0.817016
ENSG00000079156	OSBPL6	1.32127	0.0358922	1	up	8.41795	3.30873	6.85712	6.42999	11.9667	2.73561	5.87037	1.3202
ENSG00000092871	RFFL	1.13689	0.0359677	1	up	4.42101	1.95587	2.59645	4.30602	6.36055	2.48693	1.38124	1.99946
ENSG00000127578	WFIKKN1	1.22779	0.0361208	1	up	0.453121	0.136166	0.581311	0.302235	0.475816	0.175089	0.134052	0.099358
ENSG00000181104	F2R	-1.04088	0.0361799	1	down	2.22653	4.6868	3.62405	1.79111	1.26443	10.0697	2.66935	1.32129
ENSG00000115592	PRKAG3	-1.10555	0.0361988	1	down	6.21722	13.4935	9.88895	7.36205	1.40067	7.02249	28.1795	5.27849
ENSG00000175699	CCDC197	1.89138	0.0362094	1	up	0.889736	0.166783	0.0825861	0.311335	2.27529	0.347214	0.0591366	0.0939982
ENSG00000116830	TTF2	1.28013	0.0369795	1	up	1.96171	0.748925	1.35838	1.48429	3.04247	0.387014	0.446594	1.41317
ENSG00000140873	ADAMTS18	2.14984	0.0370224	1	up	0.777075	0.0976376	1.19633	1.05929	0.0756084	0.0444493	0	0.248463
ENSG00000151079	KCNA6	-1.00973	0.0370368	1	down	0.10941	0.321654	0.215736	0.037877	0.074616	0.574113	0.283507	0.107343
ENSG00000178055	PRSS42	-1.19244	0.0370492	1	down	1.46871	3.48511	3.19107	0.501497	0.713564	6.42699	1.54832	2.48003
ENSG00000198732	SMOC1	1.15835	0.0372	1	up	2.79942	1.19901	3.4693	2.05416	2.8748	1.40051	1.20394	0.992589
ENSG00000021355	SERPINB1	-1.05089	0.0372423	1	down	15.1954	31.5893	12.6337	13.9182	19.0344	13.0485	17.4322	64.2872
ENSG00000108960	MMD	1.35599	0.037365	1	up	5.24833	1.98942	4.45595	9.54207	1.74697	2.08404	1.95081	1.93341
ENSG00000184792	OSBP2	1.3529	0.0377892	1	up	1.39888	0.486818	0.454404	2.57624	1.166	0.620567	0.50441	0.335478
ENSG00000174130	TLR6	1.55648	0.0378691	1	up	1.50025	0.444051	1.3757	2.41646	0.70858	0.981495	0.163882	0.186777
ENSG00000116983	HPCAL4	1.24034	0.038079	1	up	0.420465	0.120299	0.588556	0.284694	0.388145	0.159111	0.142826	0.058959
ENSG00000197632	SERPINB2	-2.39596	0.0381681	1	down	0.162465	1.28143	0	0.420809	0.0665854	0.112095	0.0661832	3.666
ENSG00000127533	F2RL3	-1.44934	0.0386405	1	down	0.259297	0.881184	0.073715	0.19447	0.509707	0.28349	0.876708	1.48335
ENSG00000102678	FGF9	-1.25583	0.038931	1	down	0.142298	0.478619	0.133446	0.0383993	0.255047	0.89587	0.138813	0.401174
ENSG00000275395	FCGBP	1.12684	0.0392237	1	up	0.430116	0.142749	0.524768	0.362039	0.403539	0.095619	0.0820816	0.250548
ENSG00000181751	C5orf30	1.15676	0.0392556	1	up	3.6307	1.57329	2.16555	3.79218	4.93439	1.60523	1.54357	1.57107
ENSG00000060982	BCAT1	1.65879	0.0396793	1	up	1.93276	0.543784	4.24571	1.24679	0.305786	0.220275	0.502551	0.908526
ENSG00000152926	ZNF117	1.0779	0.0399601	1	up	2.32823	1.05029	3.05726	2.35106	1.57636	1.42784	0.791134	0.931908
ENSG00000160307	S100B	1.73893	0.0399716	1	up	2.80541	0.770437	2.32831	4.595	1.49291	1.47608	0.54236	0.292875
ENSG00000174808	BTC	1.34465	0.0402699	1	up	0.528089	0.14731	0.437441	0.274243	0.872582	0.16124	0.193573	0.087116
ENSG00000185028	LRRC14B	-1.01647	0.0404523	1	down	2.99913	6.1694	1.9816	5.91245	1.10333	5.20427	7.67636	5.62758
ENSG00000120457	KCNJ5	1.77355	0.0405441	1	up	0.79694	0.162344	1.99131	0.26566	0.133854	0.109365	0.0908003	0.286867
ENSG00000115602	IL1RL1	-1.27977	0.0408138	1	down	0.290129	0.847233	0.619771	0.125197	0.125419	0.221422	0.263159	2.05712
ENSG00000185559	DLK1	1.90565	0.040834	1	up	2.36341	0.557474	2.95153	0.0846286	4.05407	1.07688	0.261905	0.333633
ENSG00000184838	PRR16	-1.00104	0.0412561	1	down	1.29704	2.69608	2.59267	0.858648	0.439797	2.67888	3.82414	1.58522
ENSG00000204271	SPIN3	1.02251	0.0413128	1	up	0.579712	0.234594	0.759334	0.484985	0.494817	0.319639	0.171532	0.212611
ENSG00000214787	MS4A4E	1.79176	0.0417747	1	up	1.11179	0.24999	2.41536	0.684399	0.23562	0.175375	0.363132	0.211464
ENSG00000106483	SFRP4	2.34636	0.0426777	1	up	26.3414	5.09947	72.9359	4.67828	1.40997	9.53451	4.06569	1.69821
ENSG00000129038	LOXL1	1.82186	0.0428342	1	up	5.11059	1.37384	12.764	0.682795	1.88495	1.34516	0.937699	1.83867
ENSG00000077984	CST7	1.97155	0.0431515	1	up	3.55693	0.832438	1.26411	8.65327	0.753417	1.03781	0.997275	0.462234
ENSG00000049540	ELN	1.64668	0.0432494	1	up	6.98192	2.16178	16.3936	3.18784	1.36433	2.95134	1.88559	1.64841
ENSG00000134516	DOCK2	1.32881	0.043269	1	up	3.00143	1.13467	3.84702	4.39675	0.760518	1.55224	0.685391	1.16639
ENSG00000277775	HIST1H3F	1.81279	0.0438179	1	up	4.22323	1.13057	4.66772	1.2675	6.73448	1.11597	1.65535	0.620381
ENSG00000042980	ADAM28	1.32889	0.0438607	1	up	0.333601	0.0726052	0.772161	0.179195	0.0494471	0.0964588	0.0934249	0.0279318
ENSG00000121316	PLBD1	1.22136	0.0449558	1	up	8.29438	3.50017	9.0713	12.6333	3.17849	4.05878	3.04394	3.39779
ENSG00000105650	PDE4C	-1.39885	0.0449821	1	down	0.213712	0.727229	0.315387	0.21996	0.105788	1.8809	0.262658	0.0381298
ENSG00000129048	ACKR4	1.57901	0.0453828	1	up	0.495456	0.0993057	0.897183	0.524826	0.0643602	0.084877	0.178275	0.0347652
ENSG00000004939	SLC4A1	2.25692	0.0458281	1	up	4.57629	0.878365	0.0101077	7.91736	5.80141	1.24165	0.963418	0.430022
ENSG00000262655	SPON1	2.16667	0.0459207	1	up	6.98675	1.47839	17.9621	2.4429	0.555276	1.75149	0.221977	2.4617
ENSG00000110876	SELPLG	1.46864	0.0459706	1	up	8.14159	2.87788	8.94069	13.9085	1.57557	4.12805	2.05577	2.44983
ENSG00000178053	MLF1	-1.1683	0.0459804	1	down	4.46176	10.1524	6.25708	5.52739	1.60082	4.88598	23.6831	1.88805
ENSG00000104774	MAN2B1	1.22712	0.0461488	1	up	6.47092	2.7069	11.2336	5.35737	2.82177	2.24879	2.66071	3.21119
ENSG00000166501	PRKCB	1.40861	0.0461609	1	up	1.80304	0.616828	0.867273	3.97197	0.569883	0.999905	0.475371	0.375208
ENSG00000030582	GRN	1.19236	0.0462517	1	up	23.7635	10.3424	36.303	23.2591	11.7284	10.6384	7.84538	12.5434
ENSG00000100351	GRAP2	1.51888	0.0463841	1	up	0.972266	0.274174	0.471849	2.08767	0.357281	0.519293	0.183252	0.119976
ENSG00000115956	PLEK	1.36744	0.0464354	1	up	12.2526	4.68759	15.0798	18.4473	3.23069	5.46318	2.67187	5.92771
ENSG00000109184	DCUN1D4	1.01344	0.046618	1	up	3.51806	1.69226	3.47358	3.78586	3.29474	2.07257	1.76192	1.24228
ENSG00000172794	RAB37	1.53352	0.0468232	1	up	0.910266	0.24898	0.419191	2.00547	0.306138	0.321551	0.291073	0.134315
ENSG00000102032	RENBP	1.8393	0.047138	1	up	2.0617	0.504104	4.12367	1.68189	0.379534	0.351868	0.276418	0.884024
ENSG00000186496	ZNF396	1.06103	0.0471632	1	up	0.236613	0.0613352	0.296632	0.288342	0.124863	0.0619215	0.102357	0.0197272
ENSG00000163564	PYHIN1	1.37672	0.0474445	1	up	0.467749	0.118636	0.639121	0.607785	0.156342	0.0885594	0.222174	0.0451752
ENSG00000155629	PIK3AP1	1.24031	0.0476729	1	up	3.70356	1.50998	5.2944	4.57604	1.24025	1.69087	1.07262	1.76646
ENSG00000163154	TNFAIP8L2	1.88759	0.0484503	1	up	2.47416	0.595687	3.62861	3.40375	0.39012	0.929039	0.184975	0.673048
ENSG00000213402	PTPRCAP	2.56144	0.0488554	1	up	1.88575	0.236398	3.13714	1.57249	0.94762	0	0	0.709193
ENSG00000197562	RAB40C	1.12943	0.0491583	1	up	4.04566	1.79497	3.82845	4.84593	3.46261	2.25077	0.898416	2.23571
ENSG00000105825	TFPI2	-1.18929	0.0491779	1	down	0.661098	1.63562	0.472675	0.294685	1.21593	2.10146	1.47865	1.32674
ENSG00000136250	AOAH	1.57833	0.0492374	1	up	2.68272	0.831845	2.89845	4.5336	0.616106	1.5834	0.486409	0.425724
ENSG00000181619	GPR135	1.24708	0.049386	1	up	0.991961	0.360042	1.15108	0.938905	0.885897	0.256657	0.351882	0.471586
ENSG00000124107	SLPI	1.35727	0.0494478	1	up	32.8534	12.7624	29.3543	60.1007	9.10513	14.097	13.9252	10.2649
ENSG00000271303	SRXN1	1.33845	0.04945	1	up	19.9045	7.81069	5.33633	14.5993	39.778	7.05259	5.99297	10.3865
ENSG00000223609	HBD	2.68706	0.0498579	1	up	3.87008	0.516472	0	3.12973	8.48051	0.830274	0.677661	0.0414811
