# Supplementary material for: Integrated analysis of long non-coding RNAs (lncRNAs) and mRNA expression profiles identifies lncRNA PRKG1-AS1 playing important roles in skeletal muscle aging
Source: Aging (Albany NY). 2021 May 29;13(11):15044–60. doi: 10.18632/aging.203067 (PMC8221296; doi:10.18632/aging.203067)
Supplement: Supplementary Table 2 [file aging-13-203067-s002.xlsx]

## Sheet: Sheet1
Supplementary Table 2. The list of differentially expressed lncRNAs.
ID	Symbol	log2FC	P value	FDR	regulate	mean_Old	mean_Yong	fpkm_Old1	fpkm_Old2	fpkm_Old3	fpkm_Young1	fpkm_Young2	fpkm_Young3
ENSG00000251443	LINC02160	-6.55828	0.00792248	1	down	0	9.32407	0	0	0	25.2348	0	2.73745
ENSG00000271952	LINC01954	-6.25942	0.00097167	0.621199	down	0	7.56077	0	0	0	2.47451	8.28947	11.9183
ENSG00000229044	AL451070.1	-5.8234	0.0232343	1	down	0	5.56265	0	0	0	13.5591	2.05436	1.0745
ENSG00000283914	AC087645.4	-5.80326	0.00219672	0.692267	down	0	5.48413	0	0	0	0	7.95448	8.49791
ENSG00000223617	LINC00370	-5.68876	0.00367	0.934238	down	0	5.05806	0	0	0	10.4444	3.56801	1.16178
ENSG00000230266	XXYLT1-AS2	-5.41133	0.00376637	0.934238	down	0	4.15572	0	0	0	8.42909	1.68726	2.35081
ENSG00000249688	AC022447.6	-5.17407	0.0438107	1	down	0	3.51037	0	0	0	6.6377	2.13421	1.7592
ENSG00000253267	DLGAP2-AS1	-5.16125	5.12e-05	0.225313	down	0	3.47841	0	0	0	0.680176	0.661895	9.09315
ENSG00000255039	LINC02553	-5.15533	0.00823261	1	down	0	3.46376	0	0	0	2.95244	5.5107	1.92815
ENSG00000254639	AC116021.1	-5.03645	0.013801	1	down	0	3.18187	0	0	0	2.91111	4.26872	2.36579
ENSG00000251015	SLC25A30-AS1	-4.95598	0.0439823	1	down	0	3.00384	0	0	0	0	7.66559	1.34594
ENSG00000268093	AC022154.1	-4.76301	0.002392	0.692267	down	0	2.61525	0	0	0	4.35071	0.796226	2.69882
ENSG00000276348	AL353770.3	-4.56983	0.000209797	0.445259	down	0	2.27495	0	0	0	1.95194	3.66367	1.20925
ENSG00000243629	LINC00880	-4.4081	0.00168362	0.6685	down	0	2.02309	0	0	0	4.26174	0.874006	0.933533
ENSG00000259322	AC090607.1	-4.37097	0.0430082	1	down	0.590858	14.195	0	0	1.77258	39.1216	3.46323	0
ENSG00000238258	AL121748.2	-4.36924	0.0405993	1	down	0	1.96667	0	0	0	1.3899	1.09528	3.41482
ENSG00000251173	UCHL1-AS1	-4.10511	0.045016	1	down	0	1.62093	0	0	0	1.84951	1.67511	1.33816
ENSG00000223813	AC007255.1	-3.89742	0.0160705	1	down	0.0663336	2.37869	0	0.199001	0	4.34768	1.47795	1.31043
ENSG00000204241	AP000911.1	-3.86466	0.00158154	0.6685	down	0.582741	9.8457	1.38066	0	0.367559	27.1789	1.25891	1.09934
ENSG00000278982	AL139125.2	-3.86063	0.0119713	1	down	0	1.35266	0	0	0	2.21997	0.330291	1.50773
ENSG00000279412	AC020763.3	-3.63115	0.00360217	0.934238	down	0	1.13904	0	0	0	1.00617	0.136655	2.27429
ENSG00000261889	AC108134.2	-3.62103	0.00178491	0.6685	down	2.82673	35.9098	3.03956	3.52184	1.91878	99.7672	4.28753	3.6748
ENSG00000230970	HHATL-AS1	-3.60655	0.000331174	0.527145	down	1.2968	16.9143	0.763098	1.33342	1.79388	39.0748	7.09106	4.57694
ENSG00000232124	AP001057.1	-3.44803	0.01643	1	down	0	0.991337	0	0	0	1.39139	0.916925	0.665695
ENSG00000269356	AL356740.2	-3.43404	0.00734548	1	down	0.691984	8.45986	0.825332	0	1.25062	6.36018	4.86437	14.155
ENSG00000278952	AP003068.4	-3.37197	0.0378679	1	down	0.284853	3.88436	0	0.85456	0	5.46494	1.85098	4.33715
ENSG00000272542	AL137246.1	-3.34469	0.0141294	1	down	3.35616	35.0111	3.67098	0	6.39751	13.6974	90.2994	1.03654
ENSG00000272989	LINC02012	-3.21382	0.0418507	1	down	0	0.827802	0	0	0	0.722718	0.398759	1.36193
ENSG00000283175	AC007920.2	-3.20913	0.000728289	0.621199	down	1.02231	10.279	2.13958	0.927348	0	16.4682	12.4451	1.9237
ENSG00000233907	LINC01761	-3.19877	0.042989	1	down	0	0.818179	0	0	0	0.986348	1.46819	0
ENSG00000273301	AC016717.2	-3.15026	0.0113503	1	down	0.153127	2.1473	0.459381	0	0	0	4.87337	1.56854
ENSG00000234859	AC003958.2	-3.14526	0.019846	1	down	0	0.784746	0	0	0	1.48689	0.867344	0
ENSG00000279668	AC024610.2	-3.05863	0.00718078	1	down	0.581184	5.57551	0.0797263	1.66383	0	2.66825	11.5004	2.5579
ENSG00000180458	AC022148.1	-2.8578	0.0244261	1	down	0	0.624911	0	0	0	1.23274	0.182204	0.459786
ENSG00000240859	AC093627.4	-2.79736	0.000975654	0.621199	down	0.872215	6.65853	2.20085	0	0.415796	9.4867	4.38453	6.10436
ENSG00000254443	AC068733.1	-2.68585	0.0174012	1	down	0.33739	2.71442	0	0.371765	0.640405	2.359	4.26589	1.51837
ENSG00000237949	LINC00844	-2.68143	0.00456715	1	down	11.5376	74.554	8.21143	26.4013	0	85.9527	94.8922	42.8171
ENSG00000235295	LINC01634	-2.5842	0.0354234	1	down	1.95658	12.2329	0	5.86975	0	14.1705	10.6277	11.9006
ENSG00000271086	NAMA	-2.57748	0.0206342	1	down	0.194101	1.65548	0.161147	0	0.421155	3.30846	1.30364	0.354344
ENSG00000174171	AC020659.1	-2.49614	0.00176752	0.6685	down	0.338105	2.37166	0.57537	0.317662	0.121282	3.3808	1.75747	1.97672
ENSG00000279249	AC007614.1	-2.48394	0.0205766	1	down	0.0250994	0.599837	0	0.0752983	0	1.43779	0.36172	0
ENSG00000258325	ITFG2-AS1	-2.45058	0.0428911	1	down	1.62039	9.30425	0	1.3631	3.49806	10.2019	11.637	6.07384
ENSG00000267432	DNAH17-AS1	-2.41101	0.0239327	1	down	0	0.431846	0	0	0	0	0.983295	0.312243
ENSG00000261441	AC124068.2	-2.40302	0.00215611	0.692267	down	6.24739	33.472	7.20026	3.5176	8.02432	51.4125	7.68425	41.3192
ENSG00000280660	AL157396.1	-2.32746	0.00212082	0.692267	down	0.502287	2.92301	0.974013	0.108702	0.424147	5.72846	1.5094	1.53117
ENSG00000247498	GPRC5D-AS1	-2.32419	0.0430443	1	down	0.224113	1.52311	0.672339	0	0	3.28568	0.489564	0.794085
ENSG00000226197	AL583785.1	-2.28687	0.00815602	1	down	7.07407	34.9092	12.0853	2.8923	6.24458	32.6243	5.16722	66.9361
ENSG00000279259	AC087741.3	-2.27796	0.0251178	1	down	1.03682	5.41348	1.14229	0.908574	1.05961	10.0326	1.30939	4.89848
ENSG00000259370	AC103740.1	-2.18567	0.0408205	1	down	0.0592652	0.624557	0	0	0.177796	0.171173	0.543486	1.15901
ENSG00000267557	AC008474.1	-2.05955	0.0187925	1	down	4.97981	21.0755	8.19034	6.7491	0	24.2951	27.4565	11.4749
ENSG00000278445	AL137246.2	-1.99416	0.0105263	1	down	44.1647	176.243	99.3863	26.4875	6.62036	220.689	277.146	30.8944
ENSG00000259863	SH3RF3-AS1	-1.97956	0.0308022	1	down	1.1244	4.72869	0.767069	1.61374	0.992378	1.48464	3.76243	8.939
ENSG00000226833	AC092164.1	-1.91959	0.00683561	1	down	3.09233	11.9771	2.95527	4.21652	2.10519	19.4761	9.86413	6.59107
ENSG00000260273	AL359711.2	-1.91385	0.0217753	1	down	2.74862	10.634	2.84091	3.30875	2.0962	18.128	7.27477	6.49923
ENSG00000272540	AL662797.1	-1.81668	0.0071101	1	down	5.66466	20.2071	6.00002	5.27222	5.72174	22.6925	17.8504	20.0785
ENSG00000260460	AL365181.1	-1.78322	0.00530611	1	down	4.34629	15.2038	5.01719	4.71999	3.30168	5.8902	20.421	19.3002
ENSG00000261051	AC107021.2	-1.7526	0.0184313	1	down	1.87152	6.54334	3.73398	1.22969	0.650892	12.1851	3.92458	3.52032
ENSG00000279605	AC067930.6	-1.67806	0.0399918	1	down	0.306708	1.20145	0.333843	0.327796	0.258485	1.56127	0.99412	1.04897
ENSG00000260641	AC114811.2	-1.63721	0.0200297	1	down	0.645052	2.21758	1.38479	0.27741	0.272952	2.68804	2.99007	0.974639
ENSG00000234281	LANCL1-AS1	-1.60307	0.029841	1	down	14.8391	45.2832	25.5882	16.6664	2.26267	45.4618	80.8039	9.58398
ENSG00000261335	AC005837.1	-1.60071	0.0489784	1	down	1.23222	3.94052	1.43799	1.33469	0.923977	6.02423	2.04418	3.75314
ENSG00000239332	LINC01119	-1.56564	0.0402034	1	down	0.757201	2.4374	0.87069	0.648684	0.75223	2.34342	3.09954	1.86923
ENSG00000258603	AC005225.2	-1.5119	0.0103959	1	down	10.2684	29.4691	11.8321	12.0321	6.94096	32.1602	36.5927	19.6543
ENSG00000266718	AC079336.5	-1.47526	0.0337655	1	down	1.71393	4.94337	2.99449	1.82961	0.317713	6.7589	4.91709	3.15411
ENSG00000285155	AC092153.1	-1.41995	0.0111406	1	down	74.6701	199.968	118.537	47.0431	58.4299	183.139	304.091	112.673
ENSG00000261094	AC007066.2	-1.41227	0.0217318	1	down	2.01365	5.52559	3.16119	1.43027	1.4495	6.98589	4.48593	5.10496
ENSG00000265751	AC015878.1	-1.36455	0.0389915	1	down	62.5507	161.223	41.4229	76.9593	69.2699	173.199	228.798	81.6708
ENSG00000272734	ADIRF-AS1	-1.35247	0.0131187	1	down	8.4863	21.8251	7.66592	11.0262	6.76682	23.3993	20.0994	21.9765
ENSG00000238045	AC009133.1	-1.34909	0.0233322	1	down	1.68843	4.45608	3.09046	0.871938	1.10291	5.20289	4.2716	3.89373
ENSG00000174407	MIR1-1HG	-1.27317	0.0234565	1	down	474.469	1146.89	1090.79	202.507	130.109	1036.53	1333.43	1070.73
ENSG00000236208	C10orf71-AS1	-1.22151	0.0277481	1	down	70.5119	164.56	68.9847	80.9736	61.5772	150.344	226.155	117.182
ENSG00000223784	LINP1	-1.21323	0.0243603	1	down	26.7403	62.1307	42.4586	22.6285	15.1337	89.9093	47.0749	49.408
ENSG00000267423	AC005616.1	-1.20112	0.0479333	1	down	25.1343	57.9183	19.6052	36.5992	19.1984	42.2476	75.7334	55.7739
ENSG00000263072	ZNF213-AS1	-1.11286	0.048832	1	down	11.2946	24.5435	18.6559	11.9382	3.28955	37.8664	22.1039	13.6601
ENSG00000174403	MIR1-1HG-AS1	-1.10559	0.0435133	1	down	10.9962	23.7776	17.9867	6.35675	8.64519	32.6148	20.0124	18.7056
ENSG00000273018	AC107983.2	-1.09068	0.0312057	1	down	7.28335	15.6246	9.33955	8.00107	4.50945	19.7508	14.5174	12.6057
ENSG00000254166	CASC19	1.14412	0.019025	1	up	0.121012	0	0	0.0413314	0.321704	0	0	0
ENSG00000215244	AL137145.2	1.19696	0.0496732	1	up	8.08311	3.46942	6.2731	9.66197	8.31427	6.09355	3.37005	0.944661
ENSG00000204282	TNRC6C-AS1	1.21083	0.0411734	1	up	10.1492	4.32785	11.6129	11.9263	6.90841	6.7417	2.58656	3.65528
ENSG00000206567	AC022007.1	1.32276	0.0284652	1	up	10.7653	4.24362	6.99412	13.9052	11.3967	4.67086	4.24045	3.81956
ENSG00000235033	AL590999.1	1.43746	0.0499937	1	up	11.8638	4.31723	1.97121	17.1648	16.4554	3.45923	6.71423	2.77823
ENSG00000235590	GNAS-AS1	1.54153	0.0457626	1	up	2.34995	0.741611	3.1473	2.15711	1.74544	0.793667	0.856942	0.574224
ENSG00000233396	LINC01719	1.54198	0.0343748	1	up	11.4556	3.86834	17.1317	6.92851	10.3065	2.74577	3.97697	4.88228
ENSG00000249042	AC008771.1	1.59842	0.0312033	1	up	8.42191	2.71426	11.2088	4.74594	9.31104	4.58725	2.05908	1.49644
ENSG00000233110	AC093797.1	1.60247	0.0396448	1	up	21.4296	6.98996	6.13309	9.75035	48.4053	4.39701	12.213	4.35983
ENSG00000233844	KCNQ5-IT1	1.63228	0.0137145	1	up	78.0502	25.1095	123.674	77.3422	33.1349	30.0025	31.1895	14.1363
ENSG00000257298	AC008147.2	1.6865	0.00641243	1	up	15.7156	4.8136	26.8225	12.379	7.94537	6.58099	5.10216	2.75764
ENSG00000240288	GHRLOS	1.80957	0.00791064	1	up	28.383	8.02553	49.1464	21.2312	14.7713	9.57379	5.56399	8.93882
ENSG00000237352	LINC01358	1.82401	0.030502	1	up	2.53653	0.644647	1.9402	4.79681	0.872582	0.403049	1.30501	0.225882
ENSG00000203280	AL022323.1	1.84137	0.0221461	1	up	122.21	34.0314	42.657	61.2128	262.76	13.3018	52.7634	36.0291
ENSG00000205056	LINC02397	1.87983	0.00173671	0.6685	up	13.1186	3.4917	8.63527	9.93555	20.785	3.84832	3.69366	2.9331
ENSG00000248690	HAS2-AS1	1.96533	0.0383523	1	up	3.61249	0.850694	5.79248	1.77372	3.27128	0.541902	1.55771	0.452469
ENSG00000284959	AC007262.2	1.99104	0.0153263	1	up	2.04927	0.440664	1.98766	2.5824	1.57776	0.552772	0.769221	0
ENSG00000264589	MAPT-AS1	2.09232	0.0296782	1	up	0.326433	0	0.352964	0.196172	0.430162	0	0	0
ENSG00000257127	CLLU1	2.09723	0.0302584	1	up	1.17812	0.198705	0.845564	0.134785	2.55401	0.214531	0.381583	0
ENSG00000274767	AC243829.1	2.09778	0.032695	1	up	8.64584	1.94319	4.26274	16.9711	4.70363	4.08693	1.74262	0
ENSG00000260337	AC091544.4	2.14348	0.00228861	0.692267	up	18.7598	4.16859	13.8415	32.0437	10.3942	3.72033	7.34191	1.44352
ENSG00000268555	AC123912.4	2.14723	0.0429052	1	up	70.2416	15.7793	6.32054	60.6133	143.791	30.1742	17.1638	0
ENSG00000281103	TRG-AS1	2.1719	0.00923858	1	up	2.60674	0.500677	3.82888	3.22051	0.770835	1.06005	0.213528	0.228453
ENSG00000236333	TRHDE-AS1	2.17936	0.0089146	1	up	10.7479	2.29494	10.3137	20.6739	1.25623	2.22487	1.9798	2.68016
ENSG00000283897	AC011416.3	2.21239	0.0168439	1	up	2.9158	0.550739	2.58214	2.46455	3.7007	1.24842	0	0.403799
ENSG00000236682	AC068282.1	2.45009	0.00410848	0.934238	up	7.15078	1.22689	9.41385	1.27773	10.7607	2.17243	1.23863	0.269594
ENSG00000251301	LINC02384	2.55258	0.00857341	1	up	2.81285	0.396497	4.64442	2.93474	0.859402	0.386698	0.502879	0.299914
ENSG00000236671	PRKG1-AS1	2.55312	0.0452551	1	up	0.486902	0	0.861303	0.319488	0.279916	0	0	0
ENSG00000251576	LINC01267	2.57236	0.0488257	1	up	2.88207	0.401371	2.14361	0.224892	6.27771	0	0.253997	0.950117
ENSG00000229323	DLEU1-AS1	2.57537	0.0224431	1	up	10.697	1.71151	11.8649	15.8381	4.38807	0	3.85241	1.2821
ENSG00000260592	AC130456.3	2.58939	0.0343498	1	up	37.2014	6.09785	0	93.1508	18.4533	6.48155	4.87607	6.93594
ENSG00000250392	LINC02502	2.63936	0.0408404	1	up	21.0609	3.29631	23.5123	0	39.6704	6.01528	3.87364	0
ENSG00000234449	FAM239A	2.7726	0.018082	1	up	2.14661	0.228771	0.647765	5.43132	0.360762	0	0.536563	0.149749
ENSG00000177369	AC004797.1	2.83103	0.035639	1	up	0.61158	0	0.977214	0.554944	0.302583	0	0	0
ENSG00000232229	LINC00865	2.8799	0.0245343	1	up	2.18958	0.211042	3.84594	1.48541	1.23739	0	0	0.633127
ENSG00000267724	AC012254.3	2.95624	0.0492381	1	up	0.676099	0	0.778823	0.858488	0.390987	0	0	0
ENSG00000227508	LINC01624	3.0688	0.00957374	1	up	0.739074	0	1.48243	0.514387	0.220407	0	0	0
ENSG00000228109	MELTF-AS1	3.22377	0.0348709	1	up	5.74852	0.526027	9.77985	6.25733	1.20837	0	1.57808	0
ENSG00000272815	AC098850.4	3.3928	0.000801541	0.621199	up	14.3752	1.27812	30.8375	0.740062	11.5479	1.40527	2.11977	0.309329
ENSG00000226194	LINC02519	3.41915	0.0443834	1	up	0.969713	0	2.32996	0.579181	0	0	0	0
ENSG00000254528	AP000757.1	3.53312	0.00401866	0.934238	up	4.66418	0.311541	8.65952	3.56442	1.76859	0.934622	0	0
ENSG00000181908	AP003774.1	3.68916	0.00863393	1	up	1.18987	0	0.903394	2.3261	0.340122	0	0	0
ENSG00000258479	LINC00640	3.87635	0.0171581	1	up	1.36858	0	1.69689	1.91527	0.493575	0	0	0
ENSG00000228971	AL356479.1	3.93447	0.0199262	1	up	1.42895	0	1.41944	2.86741	0	0	0	0
ENSG00000224533	TMLHE-AS1	4.0314	0.0209135	1	up	1.53521	0	0	3.74288	0.862749	0	0	0
ENSG00000280255	AC004947.2	4.06251	0.0252324	1	up	1.62602	0.003302	4.40131	0	0.476757	0	0.009906	0
ENSG00000239636	AC004865.2	4.0851	0.0118686	1	up	4.33228	0.16115	5.90428	6.13113	0.961432	0	0.48345	0
ENSG00000253619	AC068413.1	4.09239	0.00381695	0.934238	up	8.51927	0.405286	10.5321	5.02842	9.99732	0	0	1.21586
ENSG00000233067	PTCHD1-AS	4.09336	0.0187779	1	up	3.29782	0.099057	6.33158	3.17823	0.383648	0	0.297171	0
ENSG00000231871	IPO9-AS1	4.11257	0.0456833	1	up	1.62984	0	2.40525	0	2.48428	0	0	0
ENSG00000230138	AC119428.2	4.18194	0.0493039	1	up	1.71505	0	2.55499	1.65383	0.936337	0	0	0
ENSG00000253726	AC013562.1	4.22781	0.00530385	1	up	1.77369	0	3.55974	0.8955	0.865832	0	0	0
ENSG00000233093	LINC00892	4.24458	0.00480845	1	up	1.79559	0	4.12162	0.663444	0.601713	0	0	0
ENSG00000227678	AL355581.1	4.40798	7.08e-05	0.225313	up	2.02293	0	2.67957	2.85971	0.529495	0	0	0
ENSG00000254211	LINC01485	4.46092	0.00133845	0.6685	up	2.10228	0	0.365153	4.32307	1.61861	0	0	0
ENSG00000234902	AC007879.3	4.47655	0.0130997	1	up	2.12626	0	3.81486	1.25179	1.31214	0	0	0
ENSG00000259129	LINC00648	4.56815	0.000828091	0.621199	up	2.27219	0	3.21401	3.60258	0	0	0	0
ENSG00000240996	AL157400.4	4.81876	0.0434389	1	up	2.72221	0	1.79966	5.83725	0.529732	0	0	0
ENSG00000272240	AC004908.1	4.90588	0.0401146	1	up	2.89789	0	2.98657	4.23597	1.47114	0	0	0
ENSG00000251027	LINC01950	4.95119	0.0217662	1	up	2.99355	0	7.11752	1.49092	0.372216	0	0	0
ENSG00000261804	AC007342.4	4.9659	0.0129439	1	up	3.02524	0	0	7.6365	1.43922	0	0	0
ENSG00000223695	FO393418.1	5.01645	0.0385003	1	up	3.1367	0	4.42563	3.35959	1.62488	0	0	0
ENSG00000257534	AC023794.6	5.07352	0.0388899	1	up	3.26731	0	5.20945	4.59247	0	0	0	0
ENSG00000260552	AC023043.1	5.09918	0.0148006	1	up	3.32772	0	2.60338	3.54193	3.83786	0	0	0
ENSG00000271736	AL138900.3	5.25533	0.0224251	1	up	3.71956	0	0	4.82364	6.33504	0	0	0
ENSG00000259668	AC066613.1	5.2894	0.00167262	0.6685	up	3.81083	0	0	6.81693	4.61556	0	0	0
ENSG00000280164	CU638689.5	5.32351	0.00922783	1	up	3.90438	0	9.06295	0	2.65018	0	0	0
ENSG00000233928	AL591501.1	5.37292	0.0138484	1	up	4.04392	0	3.81042	5.01465	3.30668	0	0	0
ENSG00000256020	AC006205.2	5.3943	0.0328628	1	up	4.10577	0	2.7995	2.95299	6.56482	0	0	0
ENSG00000258955	LINC00519	5.4134	0.0147277	1	up	4.16184	0	10.0576	1.32845	1.09943	0	0	0
ENSG00000235629	AC090952.1	5.45244	0.0235898	1	up	4.27871	0	1.33196	8.34713	3.15706	0	0	0
ENSG00000185837	HDHD5-AS1	5.48942	0.0373099	1	up	4.39241	0	10.4562	2.72101	0	0	0	0
ENSG00000226751	AF127936.1	5.56214	0.00664941	1	up	4.62466	0	10.5189	2.46625	0.888867	0	0	0
ENSG00000274653	AC106782.6	5.6959	0.00854327	1	up	5.08367	0	1.7956	0.615511	12.8399	0	0	0
ENSG00000230435	AC004160.2	5.80406	0.0107687	1	up	5.48724	0	8.76857	7.41776	0.275387	0	0	0
ENSG00000282304	AC140479.5	6.9139	0.000420327	0.535244	up	11.9584	0	34.2854	1.58982	0	0	0	0
