# Supplementary material for: Integrated analysis of long non-coding RNAs (lncRNAs) and mRNA expression profiles identifies lncRNA PRKG1-AS1 playing important roles in skeletal muscle aging
Source: Aging (Albany NY). 2021 May 29;13(11):15044–60. doi: 10.18632/aging.203067 (PMC8221296; doi:10.18632/aging.203067)
Supplement: Supplementary Table 3 [file aging-13-203067-s003.xls]

## Sheet: LN_vs_ZC.gene.sde_all.list.go_e
Supplementary Table 3. The gene ontology terms enriched by differentially expressed genes.
ID	Description	Class	GeneRatio	BgRatio	Enrich_factor	Pvalue	FDR	GeneCount	GeneID
GO:0001775	cell activation	biological_process	70/414	1314/19098	2.45748	0	0	70	ADA2,ADAMTS18,ADORA2A,ARPC5,BLNK,C3,C3AR1,C5AR1,CCL2,CCL5,CD209,CD4,CD5,CD53,CR1,CREG1,CSRP1,CTSS,CYBB,DOCK2,DTX1,F2R,F2RL3,FCGR2B,GPAM,GRAP2,GRN,HDAC4,HLA-DMB,HSP90AA1,HSPA1B,HSPA6,HSPH1,IGLL5,IL18,IL1RL1,IL31RA,IL6,IL7R,ITGA2B,ITGAM,ITGB2,ITK,LEP,LMO1,MAN2B1,MAP3K14,NR4A3,PLEK,PNP,PRKAR1A,PRKCB,RAB37,RASGRP1,SELPLG,SERPINB1,SFRP1,SIRPA,SLC2A5,SLPI,SYK,THBS1,TIGIT,TLR6,TLR7,TLR8,TNFAIP8L2,TREML1…
GO:0002376	immune system process	biological_process	133/414	2809/19098	2.18418	0	0	133	ACKR4,ADA2,ADIPOQ,ADORA2A,ADSSL1,AQP4,ARPC5,BLNK,C1QA,C1QB,C1QC,C1S,C2,C3,C3AR1,C4A,C4B,C5AR1,C6,CADM1,CALM1,CCL2,CCL5,CD209,CD248,CD4,CD5,CD53,CEBPA,CFB,CH25H,CITED2,CLEC10A,CR1,CREG1,CSF1R,CSF3,CST7,CTSL,CTSS,CXCL14,CXCL3,CXCL9,CYBB,DOCK2,DTX1,EPB42,FBN1,FCGR2B,GPAM,GPR174,GRAP2,GRN,HDAC4,HIST1H3B,HIST1H3C,HIST1H3F,HIST1H3I,HLA-DMB,HLA-DQB1,HSP90AA1,HSPA1B,HSPA6,HSPH1,IGLL5,IL18,IL1RL1,IL31RA,I…
GO:0002682	regulation of immune system process	biological_process	84/414	1433/19098	2.70409	0	0	84	ADIPOQ,ADORA2A,ARPC5,C1QA,C1QB,C1QC,C1S,C2,C3,C3AR1,C4A,C4B,C5AR1,C6,CADM1,CALM1,CCL2,CCL5,CD209,CD4,CD5,CFB,CLEC10A,CR1,CSF3,CTSL,CTSS,CXCL14,CXCL3,CXCL9,DTX1,FBN1,FCGR2B,GPAM,GRAP2,HIST1H3B,HIST1H3C,HIST1H3F,HIST1H3I,HLA-DMB,HSP90AA1,HSPA1B,HSPH1,IGLL5,IL18,IL1RL1,IL31RA,IL6,IL7R,ITGA2B,ITGAM,ITGB2,ITK,LEP,LMO1,MAP3K14,MASP1,MS4A2,NR4A3,PDE4B,PDGFD,PIK3AP1,PIK3R2,PNP,PRKAR1A,PRKCB,RAET1E,RARRES…
GO:0002684	positive regulation of immune system process	biological_process	65/414	980/19098	3.05967	0	0	65	ARPC5,C1QA,C1QB,C1QC,C1S,C2,C3,C3AR1,C4A,C4B,C5AR1,C6,CADM1,CCL2,CCL5,CD209,CD4,CD5,CFB,CLEC10A,CR1,CSF3,CTSL,CTSS,CXCL14,CXCL3,CXCL9,FCGR2B,GPAM,GRAP2,HLA-DMB,HSP90AA1,HSPA1B,HSPH1,IGLL5,IL18,IL1RL1,IL6,IL7R,ITGA2B,ITGAM,ITGB2,ITK,LEP,MAP3K14,MASP1,NR4A3,PDE4B,PDGFD,PIK3AP1,PIK3R2,PNP,PRKCB,RAET1E,RARRES2,RASGRP1,SERPINE1,SH2D1A,SYK,THBS1,THBS4,TLR6,TLR7,TLR8,VNN1
GO:0005576	extracellular region	cellular_component	180/414	4537/19098	1.83017	0	0	180	ABCA1,ACP5,ACTN3,ADA2,ADAM28,ADAMTS15,ADAMTS18,ADAMTS4,ADAMTS8,ADAMTS9,ADGRV1,ADIPOQ,ADM,AKR1C1,AKR1C3,ALB,ALDH3A2,ALPL,ANGPTL7,AOAH,AQP1,ARPC5,BTC,C1QA,C1QB,C1QC,C1S,C2,C3,C4A,C4B,C6,CADM1,CALM1,CCDC80,CCL2,CCL5,CD163L1,CD209,CD248,CD53,CD82,CFB,CHI3L2,CHL1,CHMP1B,CILP2,CLDN5,CLEC3B,CLIC6,CMA1,COL11A1,COL11A2,COL22A1,CP,CPVL,CPXM1,CR1,CREB5,CREG1,CSF3,CSRP1,CST7,CTSL,CTSS,CXCL14,CXCL3,CXCL9,DDX1…
GO:0005615	extracellular space	cellular_component	152/414	3596/19098	1.9499	0	0	152	ABCA1,ACP5,ACTN3,ADA2,ADAMTS15,ADAMTS4,ADAMTS9,ADGRV1,ADIPOQ,ADM,AKR1C1,AKR1C3,ALB,ALDH3A2,ALPL,AQP1,ARPC5,BTC,C1QA,C1QB,C1QC,C1S,C2,C3,C4A,C4B,C6,CADM1,CALM1,CCDC80,CCL2,CCL5,CD209,CD248,CD53,CD82,CFB,CHI3L2,CHL1,CHMP1B,CILP2,CLDN5,CLEC3B,CLIC6,COL11A1,CP,CPVL,CPXM1,CR1,CREB5,CREG1,CSF3,CSRP1,CST7,CTSL,CTSS,CXCL14,CXCL3,CXCL9,DDX11,DLK1,DNAJB1,DOCK2,DSC2,EFEMP1,EGFL6,F13A1,FBN1,FGF9,FGFBP2,GLYAT…
GO:0006950	response to stress	biological_process	151/414	3742/19098	1.86149	0	0	151	ABCA1,ACP5,ADAMTS18,ADIPOQ,ADM,ADORA2A,ADSSL1,AGTRAP,AKR1C3,ALB,ANGPTL7,AOAH,AQP1,AQP4,ARNTL,AVPR1A,BLNK,C1QA,C1QB,C1QC,C1S,C2,C3,C3AR1,C4A,C4B,C5AR1,C5orf30,C6,CADM1,CCL2,CCL5,CD209,CD4,CFB,CHL1,CITED2,CLEC10A,CMA1,CR1,CSF1R,CSRP1,CTSL,CTSS,CXCL3,CXCL9,CYBB,DDX11,DNAJB1,DSC2,E2F8,EEPD1,ERCC5,EXTL1,F13A1,F2R,F2RL3,FCGR2B,FOLR2,FOSL1,GPAM,GPR37,GPX3,GRAP2,HBD,HDAC4,HIST1H3B,HIST1H3C,HIST1H3F,HIST1…
GO:0006952	defense response	biological_process	86/414	1562/19098	2.53983	0	0	86	ACP5,ADIPOQ,ADORA2A,AOAH,AQP4,BLNK,C1QA,C1QB,C1QC,C1S,C2,C3,C3AR1,C4A,C4B,C5AR1,C5orf30,C6,CADM1,CCL2,CCL5,CD209,CD4,CFB,CLEC10A,CMA1,CR1,CSF1R,CTSL,CTSS,CXCL3,CXCL9,CYBB,F2R,FCGR2B,FOLR2,FOSL1,GPAM,GRAP2,HDAC4,HSPA1B,IGLL5,IL18,IL1RL1,IL31RA,IL6,ITGAM,ITGB2,ITGB6,ITK,JCHAIN,LEP,LGALS3BP,LILRB5,MAP3K14,MASP1,MRC1,MS4A2,NAIP,NCAM1,PIK3AP1,PLA2G2A,PTGS1,PTPRCAP,RAET1E,RARRES2,RASGRP1,S100B,SCN9A,SD…
GO:0006955	immune response	biological_process	94/414	1944/19098	2.23059	0	0	94	ACKR4,ADA2,AQP4,ARPC5,BLNK,C1QA,C1QB,C1QC,C1S,C2,C3,C3AR1,C4A,C4B,C5AR1,C6,CADM1,CALM1,CCL2,CCL5,CD209,CD4,CD53,CFB,CLEC10A,CR1,CREG1,CSF1R,CSF3,CST7,CTSL,CTSS,CXCL14,CXCL3,CXCL9,CYBB,DOCK2,FCGR2B,GRAP2,GRN,HLA-DMB,HLA-DQB1,HSP90AA1,HSPA1B,HSPA6,IGLL5,IL18,IL1RL1,IL31RA,IL6,IL7R,ITGAM,ITGB2,ITK,JCHAIN,LEP,LILRB5,MAN2B1,MAP3K14,MARCH1,MASP1,MRC1,MS4A2,NAIP,NCAM1,NR4A3,OPRD1,PDE4B,PIK3AP1,PIK3R2,PL…
GO:0031012	extracellular matrix	cellular_component	42/414	465/19098	4.16662	0	0	42	ADAMTS15,ADAMTS18,ADAMTS4,ADAMTS8,ADAMTS9,ALPL,CCDC80,CD248,CHL1,CILP2,CLEC3B,CMA1,COL11A1,COL11A2,COL22A1,EFEMP1,EGFL6,ELN,FBN1,FGF9,FRAS1,IL1RL1,KERA,LGALS3BP,LMCD1,LOXL1,MMP19,NCAM1,PHOSPHO1,RARRES2,SERPINB1,SERPINE1,SFRP1,SLPI,SMOC1,SPON1,TFPI2,TGM2,THBS1,THBS4,TPSB2,WISP1
GO:0044421	extracellular region part	cellular_component	164/414	3812/19098	1.98463	0	0	164	ABCA1,ACP5,ACTN3,ADA2,ADAMTS15,ADAMTS18,ADAMTS4,ADAMTS8,ADAMTS9,ADGRV1,ADIPOQ,ADM,AKR1C1,AKR1C3,ALB,ALDH3A2,ALPL,AQP1,ARPC5,BTC,C1QA,C1QB,C1QC,C1S,C2,C3,C4A,C4B,C6,CADM1,CALM1,CCDC80,CCL2,CCL5,CD209,CD248,CD53,CD82,CFB,CHI3L2,CHL1,CHMP1B,CILP2,CLDN5,CLEC3B,CLIC6,CMA1,COL11A1,COL11A2,COL22A1,CP,CPVL,CPXM1,CR1,CREB5,CREG1,CSF3,CSRP1,CST7,CTSL,CTSS,CXCL14,CXCL3,CXCL9,DDX11,DLK1,DNAJB1,DOCK2,DSC2,EFE…
GO:0050727	regulation of inflammatory response	biological_process	33/414	321/19098	4.74238	0	0	33	ACP5,ADIPOQ,ADORA2A,AOAH,C1QA,C1QB,C1QC,C1S,C2,C3,C3AR1,C4A,C4B,C5AR1,C5orf30,C6,CCL5,CFB,CMA1,CR1,FCGR2B,IL18,IL1RL1,IL6,LEP,PIK3AP1,PLA2G2A,SELE,SERPINE1,TGM2,TLR6,TLR7,TNFAIP8L2
GO:0050896	response to stimulus	biological_process	265/414	8689/19098	1.4069	1.47917e-14	7.81568e-12	265	ABCA1,ABCB5,ABCG1,ACKR4,ACP5,ACTN3,ACVR1C,ADA2,ADAMTS18,ADGRV1,ADIPOQ,ADM,ADORA2A,ADSSL1,AGTRAP,AKR1C1,AKR1C2,AKR1C3,ALB,ALPL,ANGPTL7,AOAH,AQP1,AQP4,ARC,ARHGAP20,ARHGAP36,ARNTL,ARPC5,ASB14,ASB18,ATP5F1D,AVPR1A,BLNK,BTC,C1QA,C1QB,C1QC,C1S,C2,C3,C3AR1,C4A,C4B,C5AR1,C5orf30,C6,CADM1,CALM1,CCL2,CCL5,CD209,CD4,CD5,CD53,CD82,CDS1,CEBPA,CES1,CFB,CH25H,CHL1,CHRNA1,CISH,CITED2,CLDN5,CLEC10A,CLEC3B,CMA1,CO…
GO:0006954	inflammatory response	biological_process	57/414	685/19098	3.83859	5.84421e-13	2.86742e-10	57	ACP5,ADIPOQ,ADORA2A,AOAH,BLNK,C1QA,C1QB,C1QC,C1S,C2,C3,C3AR1,C4A,C4B,C5AR1,C5orf30,C6,CCL2,CCL5,CFB,CMA1,CR1,CSF1R,CXCL3,CXCL9,CYBB,F2R,FCGR2B,FOLR2,HDAC4,IL18,IL1RL1,IL31RA,IL6,ITGB2,ITGB6,LEP,MS4A2,NAIP,PIK3AP1,PLA2G2A,PTGS1,RARRES2,RASGRP1,SCN9A,SDC1,SELE,SERPINE1,SPHK1,SYK,TGM2,THBS1,TLR6,TLR7,TLR8,TNFAIP8L2,VNN1
GO:0032101	regulation of response to external stimulus	biological_process	48/414	708/19098	3.12749	2.08678e-12	9.55604e-10	48	ACP5,ADAMTS18,ADIPOQ,ADORA2A,AOAH,C1QA,C1QB,C1QC,C1S,C2,C3,C3AR1,C4A,C4B,C5AR1,C5orf30,C6,CALM1,CCL2,CCL5,CFB,CMA1,CR1,CXCL14,CXCL3,CXCL9,F2R,FABP7,FCGR2B,IL18,IL1RL1,IL6,LEP,PDGFD,PIK3AP1,PLA2G2A,PLEK,RARRES2,SELE,SERPINB2,SERPINE1,SYK,TGM2,THBS1,THBS4,TLR6,TLR7,TNFAIP8L2
GO:0009605	response to external stimulus	biological_process	95/414	2156/19098	2.03265	4.99301e-12	2.14356e-09	95	ABCA1,ACKR4,ACP5,ACVR1C,ADAMTS18,ADIPOQ,ADM,ADORA2A,ADSSL1,AKR1C3,ALB,ALPL,AOAH,AQP1,AVPR1A,C1QA,C1QB,C1QC,C1S,C2,C3,C3AR1,C4A,C4B,C5AR1,C5orf30,C6,CALM1,CCL2,CCL5,CD4,CDS1,CFB,CH25H,CHL1,CITED2,CMA1,COL11A1,CR1,CSF1R,CSF3,CSRP3,CXCL14,CXCL3,CXCL9,CYBB,DOCK2,DSC2,F2R,FABP7,FCGR2B,FOLR2,FOSL1,GPAM,HDAC4,IGLL5,IL10RA,IL12RB2,IL18,IL1RL1,IL31RA,IL6,ITGB2,JCHAIN,LEP,LOXL1,LRP11,MAP3K14,MRC1,NCAM1,NQO…
GO:0002443	leukocyte mediated immunity	biological_process	48/414	733/19098	3.02082	7.49723e-12	2.86272e-09	48	ADA2,ARPC5,C1QA,C1QB,C1QC,C1S,C2,C3,C3AR1,C4A,C4B,C5AR1,C6,CADM1,CD53,CR1,CREG1,CTSS,CYBB,DOCK2,FCGR2B,GRN,HSP90AA1,HSPA1B,HSPA6,IGLL5,IL18,IL31RA,IL6,IL7R,ITGAM,ITGB2,LEP,MAN2B1,NR4A3,PNP,RAB37,RAET1E,RASGRP1,SERPINB1,SH2D1A,SIRPA,SLC2A5,SLPI,SYK,TLR8,TRPM2,VNN1
GO:0070887	cellular response to chemical stimulus	biological_process	121/414	3074/19098	1.8158	7.50167e-12	2.86272e-09	121	ABCA1,ACKR4,ADIPOQ,ADSSL1,AGTRAP,AKR1C1,AKR1C2,AKR1C3,ALB,ALPL,AQP1,AQP4,ARNTL,AVPR1A,C3AR1,C5AR1,CCL2,CCL5,CD4,CEBPA,CES1,CH25H,CISH,CITED2,CLDN5,CLEC3B,CMA1,CSF1R,CSF3,CTSL,CTSS,CXCL14,CXCL3,CXCL9,CYBB,DDX11,DGAT2,DTX1,EXTL1,F13A1,FBN1,FCGR2B,FGF9,FMO3,FOLR2,GLYAT,GOT1,GPAM,GPR37,GPX3,HDAC4,HHIP,HIST1H3B,HIST1H3C,HIST1H3F,HIST1H3I,HSP90AA1,HSPA1B,HSPH1,IL10RA,IL12RB2,IL18,IL1RL1,IL31RA,IL6,IL7R…
GO:0006956	complement activation	biological_process	15/414	66/19098	10.4842	8.58424e-12	3.10343e-09	15	C1QA,C1QB,C1QC,C1S,C2,C3,C3AR1,C4A,C4B,C5AR1,C6,CFB,CR1,IGLL5,MASP1
GO:0045321	leukocyte activation	biological_process	63/414	1162/19098	2.50105	1.27609e-11	4.38273e-09	63	ADA2,ADORA2A,ARPC5,BLNK,C3,C3AR1,C5AR1,CCL2,CCL5,CD209,CD4,CD5,CD53,CR1,CREG1,CTSS,CYBB,DOCK2,DTX1,FCGR2B,GPAM,GRAP2,GRN,HDAC4,HLA-DMB,HSP90AA1,HSPA1B,HSPA6,HSPH1,IGLL5,IL18,IL1RL1,IL31RA,IL6,IL7R,ITGAM,ITGB2,ITK,LEP,LMO1,MAN2B1,MAP3K14,NR4A3,PNP,PRKAR1A,PRKCB,RAB37,RASGRP1,SELPLG,SERPINB1,SFRP1,SIRPA,SLC2A5,SLPI,SYK,THBS1,TIGIT,TLR6,TLR7,TLR8,TNFAIP8L2,TRPM2,VNN1
GO:0031982	vesicle	cellular_component	150/414	4231/19098	1.63544	2.87733e-11	9.41161e-09	150	ABCA1,ABCG1,ACKR4,ACP5,ACTN3,ADA2,ADGRV1,ADIPOQ,AGTRAP,AKR1C1,AKR1C3,ALB,ALDH3A2,ALPL,AOAH,AQP1,ARC,ARPC5,AVPR1A,C1QA,C1QB,C1QC,C1S,C2,C3,C3AR1,C4A,C4B,C5AR1,C6,CADM1,CALM1,CD209,CD248,CD4,CD53,CD82,CFB,CHL1,CHMP1B,CILP2,CLDN5,CLEC3B,CLIC6,CMA1,CP,CPVL,CR1,CREB5,CREG1,CSRP1,CTSL,CTSS,CYBB,DDX11,DNAJB1,DOCK2,DSC2,EFEMP1,F13A1,F2R,FBN1,FGF9,GLYAT,GOT1,GPRC5A,GPX3,GRAP2,GRN,HBM,HIST1H1B,HIST1H2AJ,HI…
GO:0030449	regulation of complement activation	biological_process	13/414	50/19098	11.9939	3.31479e-11	1.03497e-08	13	C1QA,C1QB,C1QC,C1S,C2,C3,C3AR1,C4A,C4B,C5AR1,C6,CFB,CR1
GO:2000257	regulation of protein activation cascade	biological_process	13/414	51/19098	11.7587	4.37044e-11	1.30524e-08	13	C1QA,C1QB,C1QC,C1S,C2,C3,C3AR1,C4A,C4B,C5AR1,C6,CFB,CR1
GO:0048584	positive regulation of response to stimulus	biological_process	92/414	2129/19098	1.99342	5.10427e-11	1.43527e-08	92	ADIPOQ,ADORA2A,AKR1C2,AKR1C3,ARC,ARNTL,ARPC5,BLNK,BTC,C1QA,C1QB,C1QC,C1S,C2,C3,C3AR1,C4A,C4B,C5AR1,C6,CADM1,CALM1,CCL2,CCL5,CD209,CD4,CFB,CITED2,CLEC10A,CR1,CSF1R,CSF3,CTSL,CTSS,CXCL14,CXCL3,CXCL9,DDX11,F2R,F2RL3,FCGR2B,FGF9,GPR37,GRAP2,HLA-DMB,HSP90AA1,HSPA1B,IGLL5,IL18,IL1RL1,IL31RA,IL6,IL7R,ITGAM,ITGB2,ITK,KLB,LEP,LMCD1,MAP3K14,MASP1,NAIP,NOS1,NR4A3,PDE4B,PDGFD,PIK3AP1,PIK3R2,PLA2G2A,PLEK,PRKC…
GO:0031347	regulation of defense response	biological_process	46/414	720/19098	2.94722	5.45354e-11	1.43527e-08	46	ACP5,ADIPOQ,ADORA2A,AOAH,C1QA,C1QB,C1QC,C1S,C2,C3,C3AR1,C4A,C4B,C5AR1,C5orf30,C6,CADM1,CCL5,CD209,CFB,CLEC10A,CMA1,CR1,CTSL,CTSS,FCGR2B,HSPA1B,IL18,IL1RL1,IL6,ITGAM,ITGB2,LEP,PIK3AP1,PLA2G2A,RAET1E,RASGRP1,SELE,SERPINE1,SH2D1A,SYK,TGM2,TLR6,TLR7,TLR8,TNFAIP8L2
GO:0006958	complement activation, classical pathway	biological_process	11/414	33/19098	15.3768	5.4842e-11	1.43527e-08	11	C1QA,C1QB,C1QC,C1S,C2,C3,C4A,C4B,C6,CR1,IGLL5
GO:0002250	adaptive immune response	biological_process	31/414	357/19098	4.00572	5.64161e-11	1.43527e-08	31	C1QA,C1QB,C1QC,C1S,C2,C3,C4A,C4B,C6,CD209,CD4,CLEC10A,CR1,CTSL,CTSS,FCGR2B,IGLL5,IL18,IL1RL1,IL31RA,IL6,IL7R,ITK,JCHAIN,LILRB5,PRKCB,RAET1E,SH2D1A,SYK,TLR6,TLR8
GO:0072562	blood microparticle	cellular_component	18/414	117/19098	7.09699	7.2129e-11	1.69353e-08	18	ALB,C1QB,C1QC,C1S,C3,C4A,C4B,CFB,CP,F13A1,HBD,HSPA1B,HSPA6,IGLL5,ITGA2B,JCHAIN,LGALS3BP,SLC4A1
GO:0050778	positive regulation of immune response	biological_process	45/414	699/19098	2.96977	7.21496e-11	1.69353e-08	45	ARPC5,C1QA,C1QB,C1QC,C1S,C2,C3,C3AR1,C4A,C4B,C5AR1,C6,CADM1,CCL5,CD209,CD4,CFB,CLEC10A,CR1,CTSL,CTSS,FCGR2B,GRAP2,HLA-DMB,HSP90AA1,HSPA1B,IGLL5,IL18,IL6,ITGAM,ITGB2,ITK,MASP1,NR4A3,PDE4B,PIK3AP1,PIK3R2,PRKCB,RAET1E,RASGRP1,SH2D1A,SYK,TLR6,TLR7,TLR8
GO:0072376	protein activation cascade	biological_process	16/414	89/19098	8.29311	7.39642e-11	1.69353e-08	16	C1QA,C1QB,C1QC,C1S,C2,C3,C3AR1,C4A,C4B,C5AR1,C6,CFB,CR1,F13A1,IGLL5,MASP1
GO:0009897	external side of plasma membrane	cellular_component	24/414	219/19098	5.05539	7.96273e-11	1.76439e-08	24	ABCA1,ABCG1,AQP4,CD209,CD4,CD5,CXCL9,FCGR2B,FOLR2,IGLL5,IL12RB2,IL1RL1,IL31RA,IL7R,ITGA2B,ITGAM,ITGB2,ITGB6,KCNJ5,MS4A2,NCAM1,SDC1,THBS1,TLR8
GO:0050865	regulation of cell activation	biological_process	37/414	501/19098	3.40684	8.21996e-11	1.76447e-08	37	ADAMTS18,ADORA2A,CCL2,CCL5,CD209,CD4,CD5,CR1,DTX1,FCGR2B,GPAM,GRAP2,HLA-DMB,HSPH1,IGLL5,IL18,IL1RL1,IL31RA,IL6,IL7R,ITGAM,ITGB2,LEP,LMO1,MAP3K14,NR4A3,PLEK,PNP,PRKAR1A,RASGRP1,SFRP1,SYK,THBS1,TIGIT,TLR6,TNFAIP8L2,VNN1
GO:0005578	proteinaceous extracellular matrix	cellular_component	31/414	363/19098	3.93951	8.61758e-11	1.77535e-08	31	ADAMTS15,ADAMTS18,ADAMTS4,ADAMTS8,ADAMTS9,ALPL,CCDC80,CD248,CHL1,CILP2,COL11A1,COL11A2,COL22A1,EFEMP1,EGFL6,ELN,FBN1,FGF9,FRAS1,IL1RL1,KERA,LGALS3BP,LOXL1,MMP19,PHOSPHO1,SFRP1,SMOC1,SPON1,TFPI2,THBS4,WISP1
GO:0043230	extracellular organelle	cellular_component	109/414	2746/19098	1.83111	8.78757e-11	1.77535e-08	109	ACP5,ACTN3,ADGRV1,ADIPOQ,AKR1C1,AKR1C3,ALB,ALDH3A2,ALPL,AQP1,ARPC5,C1QA,C1QB,C1QC,C1S,C2,C3,C4A,C4B,C6,CADM1,CALM1,CD209,CD248,CD53,CD82,CFB,CHL1,CHMP1B,CILP2,CLDN5,CLEC3B,CLIC6,CP,CPVL,CR1,CREB5,CREG1,CSRP1,CTSL,DDX11,DNAJB1,DOCK2,DSC2,EFEMP1,FBN1,FGF9,GLYAT,GOT1,GPRC5A,GPX3,GRN,HBM,HIST1H1B,HIST1H2AJ,HIST1H2BH,HIST1H3B,HIST1H3C,HIST1H3F,HIST1H3I,HSP90AA1,HSPA1B,HSPA6,HSPH1,IGLL5,IL18,ITGA2B,ITG…
GO:0002455	humoral immune response mediated by circulating immunoglobulin	biological_process	12/414	44/19098	12.581	1.03586e-10	2.03294e-08	12	C1QA,C1QB,C1QC,C1S,C2,C3,C4A,C4B,C6,CR1,FCGR2B,IGLL5
GO:0070062	extracellular exosome	cellular_component	108/414	2725/19098	1.82829	1.22798e-10	2.34305e-08	108	ACP5,ACTN3,ADGRV1,ADIPOQ,AKR1C1,AKR1C3,ALB,ALDH3A2,ALPL,AQP1,ARPC5,C1QA,C1QB,C1QC,C1S,C2,C3,C4A,C4B,C6,CADM1,CALM1,CD209,CD248,CD53,CD82,CFB,CHL1,CHMP1B,CILP2,CLDN5,CLEC3B,CLIC6,CP,CPVL,CR1,CREB5,CREG1,CSRP1,CTSL,DDX11,DNAJB1,DOCK2,DSC2,EFEMP1,FBN1,FGF9,GLYAT,GOT1,GPRC5A,GPX3,GRN,HBM,HIST1H1B,HIST1H2AJ,HIST1H2BH,HIST1H3B,HIST1H3C,HIST1H3F,HIST1H3I,HSP90AA1,HSPA1B,HSPA6,HSPH1,IGLL5,IL18,ITGA2B,ITG…
GO:0002920	regulation of humoral immune response	biological_process	14/414	68/19098	9.49744	1.73061e-10	3.16563e-08	14	C1QA,C1QB,C1QC,C1S,C2,C3,C3AR1,C4A,C4B,C5AR1,C6,CFB,CR1,FCGR2B
GO:0098657	import into cell	biological_process	45/414	719/19098	2.88716	1.77654e-10	3.16563e-08	45	ABCA1,ACKR4,ADIPOQ,ADM,ADORA2A,ALB,ARC,ARPC5,C2,C3,C4A,C4B,CCL2,CD163L1,CD209,CD5,CLEC10A,DOCK2,FCGR2B,FOLR2,HSP90AA1,HSPH1,IGLL5,ITGAM,ITGB2,JCHAIN,KCNJ5,LEP,LGALS3BP,MASP1,MRC1,NOS1,PIK3R2,PPT1,SELE,SERPINE1,SFRP4,SLC2A5,SLC39A14,STEAP3,STON2,SYK,TGM2,THBS1,TRPM2
GO:0002694	regulation of leukocyte activation	biological_process	35/414	466/19098	3.46473	1.79734e-10	3.16563e-08	35	ADORA2A,CCL2,CCL5,CD209,CD4,CD5,CR1,DTX1,FCGR2B,GPAM,GRAP2,HLA-DMB,HSPH1,IGLL5,IL18,IL1RL1,IL31RA,IL6,IL7R,ITGAM,ITGB2,LEP,LMO1,MAP3K14,NR4A3,PNP,PRKAR1A,RASGRP1,SFRP1,SYK,THBS1,TIGIT,TLR6,TNFAIP8L2,VNN1
GO:1903561	extracellular vesicle	cellular_component	108/414	2744/19098	1.81563	1.88479e-10	3.23666e-08	108	ACP5,ACTN3,ADGRV1,ADIPOQ,AKR1C1,AKR1C3,ALB,ALDH3A2,ALPL,AQP1,ARPC5,C1QA,C1QB,C1QC,C1S,C2,C3,C4A,C4B,C6,CADM1,CALM1,CD209,CD248,CD53,CD82,CFB,CHL1,CHMP1B,CILP2,CLDN5,CLEC3B,CLIC6,CP,CPVL,CR1,CREB5,CREG1,CSRP1,CTSL,DDX11,DNAJB1,DOCK2,DSC2,EFEMP1,FBN1,FGF9,GLYAT,GOT1,GPRC5A,GPX3,GRN,HBM,HIST1H1B,HIST1H2AJ,HIST1H2BH,HIST1H3B,HIST1H3C,HIST1H3F,HIST1H3I,HSP90AA1,HSPA1B,HSPA6,HSPH1,IGLL5,IL18,ITGA2B,ITG…
GO:0010033	response to organic substance	biological_process	119/414	3148/19098	1.74381	1.99744e-10	3.34645e-08	119	ABCA1,ABCG1,ACKR4,ACP5,ACVR1C,ADIPOQ,ADM,ADORA2A,AGTRAP,AKR1C1,AKR1C2,AKR1C3,ALPL,AQP1,AQP4,ARNTL,AVPR1A,C4B,C5AR1,CCL2,CCL5,CD4,CEBPA,CISH,CITED2,CLDN5,CLEC3B,CMA1,CSF1R,CSF3,CTSL,CTSS,CXCL3,CXCL9,CYBB,DDX11,DGAT2,DNAJB1,DTX1,EXTL1,F13A1,F2R,FBN1,FCGR2B,FGF9,FOLR2,FOSL1,GOT1,GPAM,GPX3,HDAC4,HHIP,HIST1H3B,HIST1H3C,HIST1H3F,HIST1H3I,HSP90AA1,HSPA1B,HSPA6,HSPH1,IL10RA,IL12RB2,IL18,IL1RL1,IL31RA,IL6…
GO:0007159	leukocyte cell-cell adhesion	biological_process	28/414	313/19098	4.12668	2.56261e-10	4.10071e-08	28	ADORA2A,CCL2,CCL5,CD209,CD4,CD5,DTX1,FCGR2B,GPAM,GRAP2,HLA-DMB,HSPH1,IL18,IL6,IL7R,ITGB2,LEP,MAP3K14,NR4A3,PNP,PRKAR1A,RASGRP1,SELE,SELPLG,SYK,TIGIT,TNFAIP8L2,VNN1
GO:0045087	innate immune response	biological_process	51/414	893/19098	2.63455	2.58538e-10	4.10071e-08	51	AQP4,C1QA,C1QB,C1QC,C1S,C2,C3,C4A,C4B,C6,CADM1,CCL2,CCL5,CD209,CFB,CLEC10A,CR1,CSF1R,CTSL,CTSS,CYBB,FCGR2B,GRAP2,HSPA1B,IGLL5,IL18,ITGAM,ITGB2,ITK,JCHAIN,LEP,MASP1,MRC1,NAIP,NCAM1,PIK3AP1,RAET1E,RARRES2,RASGRP1,S100B,SH2D1A,SLPI,SYK,TDGF1,TLR6,TLR7,TLR8,TNFAIP8L2,TREML1,TRIM14,VNN1
GO:0070613	regulation of protein processing	biological_process	17/414	111/19098	7.06502	2.62674e-10	4.10071e-08	17	C1QA,C1QB,C1QC,C1S,C2,C3,C3AR1,C4A,C4B,C5AR1,C6,CFB,CLEC3B,CR1,NAIP,SERPINE1,THBS1
GO:0042221	response to chemical	biological_process	154/414	4512/19098	1.57449	2.75225e-10	4.20115e-08	154	ABCA1,ABCB5,ABCG1,ACKR4,ACP5,ACVR1C,ADIPOQ,ADM,ADORA2A,ADSSL1,AGTRAP,AKR1C1,AKR1C2,AKR1C3,ALB,ALPL,AQP1,AQP4,ARNTL,ATP5F1D,AVPR1A,C1QA,C2,C3AR1,C4B,C5AR1,CALM1,CCL2,CCL5,CD4,CEBPA,CES1,CH25H,CHL1,CHRNA1,CISH,CITED2,CLDN5,CLEC3B,CMA1,CSF1R,CSF3,CTSL,CTSS,CXCL14,CXCL3,CXCL9,CYBB,DDX11,DGAT2,DNAJB1,DOCK2,DTX1,EXTL1,F13A1,F2R,FBN1,FCGR2B,FGF9,FMO3,FOLR2,FOSL1,GLYAT,GOT1,GPAM,GPR37,GPX3,HBD,HBM,HDAC4,…
GO:1903317	regulation of protein maturation	biological_process	17/414	113/19098	6.93998	3.50677e-10	5.23652e-08	17	C1QA,C1QB,C1QC,C1S,C2,C3,C3AR1,C4A,C4B,C5AR1,C6,CFB,CLEC3B,CR1,NAIP,SERPINE1,THBS1
GO:0006959	humoral immune response	biological_process	24/414	237/19098	4.67144	4.12132e-10	6.02327e-08	24	BLNK,C1QA,C1QB,C1QC,C1S,C2,C3,C3AR1,C4A,C4B,C5AR1,C6,CCL2,CFB,CR1,FCGR2B,IGLL5,IL6,JCHAIN,MASP1,PLA2G2A,RARRES2,SH2D1A,SLPI
GO:0032940	secretion by cell	biological_process	68/414	1427/19098	2.19823	5.53544e-10	7.92145e-08	68	ABCA1,ACVR1C,ADA2,ADIPOQ,ADM,ADORA2A,ALB,ARNTL,ARPC5,AVPR1A,C3,C3AR1,C5AR1,CADM1,CALM1,CCL5,CD53,CLEC3B,CR1,CREG1,CSF1R,CTSS,CYBB,DOCK2,F13A1,F2R,FCGR2B,GPAM,GRN,HSP90AA1,HSPA1B,HSPA6,IL1RL1,IL6,ITGA2B,ITGAM,ITGB2,ITGB6,KCNS3,LEP,LGALS3BP,MAN2B1,NR4A3,NSF,PLEK,PNP,PPT1,PRKCB,RAB37,RARRES2,RASGRP1,RASL10B,SDC1,SERPINB1,SERPINE1,SFRP1,SIRPA,SLC25A4,SLC2A5,SLPI,STEAP3,SYK,THBS1,TLR6,TLR8,TRIM9,TRPM2…
GO:0050776	regulation of immune response	biological_process	51/414	919/19098	2.56001	7.03149e-10	9.857e-08	51	ARPC5,C1QA,C1QB,C1QC,C1S,C2,C3,C3AR1,C4A,C4B,C5AR1,C6,CADM1,CALM1,CCL5,CD209,CD4,CFB,CLEC10A,CR1,CTSL,CTSS,FCGR2B,GRAP2,HLA-DMB,HSP90AA1,HSPA1B,IGLL5,IL18,IL1RL1,IL6,IL7R,ITGAM,ITGB2,ITK,LEP,MASP1,MS4A2,NR4A3,PDE4B,PIK3AP1,PIK3R2,PRKCB,RAET1E,RASGRP1,SH2D1A,SYK,TLR6,TLR7,TLR8,TREML1
GO:0002673	regulation of acute inflammatory response	biological_process	15/414	91/19098	7.60392	1.04121e-09	1.43041e-07	15	C1QA,C1QB,C1QC,C1S,C2,C3,C3AR1,C4A,C4B,C5AR1,C6,CFB,CR1,FCGR2B,IL6
GO:0002253	activation of immune response	biological_process	37/414	555/19098	3.07536	1.51226e-09	2.0368e-07	37	ARPC5,C1QA,C1QB,C1QC,C1S,C2,C3,C3AR1,C4A,C4B,C5AR1,C6,CD209,CD4,CFB,CLEC10A,CR1,CTSL,CTSS,FCGR2B,GRAP2,HSP90AA1,HSPA1B,IGLL5,ITGAM,ITGB2,ITK,MASP1,NR4A3,PDE4B,PIK3AP1,PIK3R2,PRKCB,SYK,TLR6,TLR7,TLR8
GO:0002449	lymphocyte mediated immunity	biological_process	22/414	217/19098	4.67682	2.19457e-09	2.89895e-07	22	C1QA,C1QB,C1QC,C1S,C2,C3,C4A,C4B,C6,CADM1,CR1,FCGR2B,IGLL5,IL18,IL31RA,IL6,IL7R,LEP,RAET1E,RASGRP1,SH2D1A,TLR8
GO:0002252	immune effector process	biological_process	56/414	1102/19098	2.3442	2.40588e-09	3.11811e-07	56	ADA2,ARPC5,C1QA,C1QB,C1QC,C1S,C2,C3,C3AR1,C4A,C4B,C5AR1,C6,CADM1,CD53,CFB,CR1,CREG1,CTSS,CXCL9,CYBB,DOCK2,FCGR2B,GPAM,GRN,HLA-DMB,HSP90AA1,HSPA1B,HSPA6,IGLL5,IL18,IL31RA,IL6,IL7R,ITGAM,ITGB2,LEP,MAN2B1,MAP3K14,MASP1,NR4A3,PIK3R2,PNP,RAB37,RAET1E,RASGRP1,SERPINB1,SH2D1A,SIRPA,SLC2A5,SLPI,SYK,TLR7,TLR8,TRPM2,VNN1
GO:1903037	regulation of leukocyte cell-cell adhesion	biological_process	25/414	280/19098	4.11879	2.48989e-09	3.16723e-07	25	ADORA2A,CCL2,CCL5,CD209,CD4,CD5,DTX1,FCGR2B,GPAM,GRAP2,HLA-DMB,HSPH1,IL18,IL6,IL7R,LEP,MAP3K14,NR4A3,PNP,PRKAR1A,RASGRP1,SYK,TIGIT,TNFAIP8L2,VNN1
GO:0050863	regulation of T cell activation	biological_process	26/414	305/19098	3.93243	3.17344e-09	3.96334e-07	26	ADORA2A,CCL2,CCL5,CD209,CD4,CD5,CR1,DTX1,FCGR2B,GPAM,GRAP2,HLA-DMB,HSPH1,IL18,IL6,IL7R,LEP,LMO1,MAP3K14,PNP,PRKAR1A,RASGRP1,SYK,TIGIT,TNFAIP8L2,VNN1
GO:0050867	positive regulation of cell activation	biological_process	26/414	307/19098	3.90681	3.64232e-09	4.44054e-07	26	CCL2,CCL5,CD209,CD4,CD5,GPAM,GRAP2,HLA-DMB,HSPH1,IGLL5,IL18,IL1RL1,IL6,IL7R,ITGAM,ITGB2,LEP,MAP3K14,NR4A3,PLEK,PNP,RASGRP1,SYK,THBS1,TLR6,VNN1
GO:0051716	cellular response to stimulus	biological_process	214/414	7205/19098	1.37015	3.68482e-09	4.44054e-07	214	ABCA1,ABCG1,ACKR4,ACTN3,ACVR1C,ADA2,ADAMTS18,ADGRV1,ADIPOQ,ADM,ADORA2A,ADSSL1,AGTRAP,AKR1C1,AKR1C2,AKR1C3,ALB,ALPL,AQP1,AQP4,ARC,ARHGAP20,ARHGAP36,ARNTL,ARPC5,ASB14,ASB18,AVPR1A,BLNK,BTC,C3,C3AR1,C5AR1,CALM1,CCL2,CCL5,CD209,CD4,CD5,CD53,CD82,CDS1,CEBPA,CES1,CH25H,CHL1,CHRNA1,CISH,CITED2,CLDN5,CLEC10A,CLEC3B,CMA1,CR1,CSF1R,CSF3,CTSL,CTSS,CXCL14,CXCL3,CXCL9,CYBB,DDX11,DGAT2,DLK1,DNAJB1,DOCK2,DSC2,D…
GO:0046903	secretion	biological_process	70/414	1560/19098	2.06996	3.7991e-09	4.49931e-07	70	ABCA1,ACVR1C,ADA2,ADIPOQ,ADM,ADORA2A,ALB,AQP1,ARNTL,ARPC5,AVPR1A,C3,C3AR1,C5AR1,CADM1,CALM1,CCL5,CD53,CLEC3B,CR1,CREG1,CSF1R,CTSS,CYBB,DOCK2,F13A1,F2R,FCGR2B,GPAM,GRN,HSP90AA1,HSPA1B,HSPA6,IL1RL1,IL6,ITGA2B,ITGAM,ITGB2,ITGB6,KCNS3,LEP,LGALS3BP,MAN2B1,NR4A3,NSF,PLA2G2A,PLEK,PNP,PPT1,PRKCB,RAB37,RARRES2,RASGRP1,RASL10B,SDC1,SERPINB1,SERPINE1,SFRP1,SIRPA,SLC25A4,SLC2A5,SLPI,STEAP3,SYK,THBS1,TLR6,TLR…
GO:0080134	regulation of response to stress	biological_process	64/414	1368/19098	2.15815	4.01752e-09	4.67734e-07	64	ACP5,ADAMTS18,ADIPOQ,ADORA2A,AOAH,ARNTL,C1QA,C1QB,C1QC,C1S,C2,C3,C3AR1,C4A,C4B,C5AR1,C5orf30,C6,CADM1,CCL5,CD209,CFB,CLEC10A,CMA1,CR1,CTSL,CTSS,DDX11,DNAJB1,F2R,FCGR2B,GPR37,HSP90AA1,HSPA1B,HSPH1,IER3,IL18,IL1RL1,IL6,ITGAM,ITGB2,LEP,NR4A3,PIK3AP1,PLA2G2A,PLEK,PYHIN1,RAET1E,RASGRP1,SELE,SERPINB2,SERPINE1,SFRP1,SH2D1A,SYK,TGM2,THBS1,TLR6,TLR7,TLR8,TNFAIP8L2,TRPM2,VNN1,ZNF385A
GO:1901700	response to oxygen-containing compound	biological_process	69/414	1548/19098	2.0562	6.58498e-09	7.5387e-07	69	ABCA1,ACP5,ACVR1C,ADIPOQ,ADM,AGTRAP,AKR1C1,AKR1C2,AKR1C3,ALPL,AQP1,AVPR1A,C5AR1,CCL2,CCL5,CD4,CISH,CLDN5,CMA1,CSF3,CXCL3,CXCL9,CYBB,DDX11,DGAT2,F2R,FBN1,FCGR2B,FOLR2,FOSL1,GOT1,GPAM,GPR37,GPX3,HSPH1,IL10RA,IL12RB2,IL18,IL6,KLF1,LEP,LOXL1,LRP11,MMP19,MRC1,NAIP,NQO1,NR4A3,PCK1,PDE4B,PDGFD,PIK3R2,PPP1R1B,PRKAR1A,PRKAR2B,PRKCB,PTGFR,RARRES2,SDC1,SELE,SERPINE1,SFRP1,SLC2A5,SLPI,THBS1,TLR6,TRPM2,TUSC5,…
GO:0022407	regulation of cell-cell adhesion	biological_process	28/414	364/19098	3.54849	7.6552e-09	8.56958e-07	28	ADAMTS18,ADIPOQ,ADORA2A,CCL2,CCL5,CD209,CD4,CD5,CITED2,DTX1,FCGR2B,GPAM,GRAP2,HLA-DMB,HSPH1,IL18,IL6,IL7R,LEP,MAP3K14,NR4A3,PNP,PRKAR1A,RASGRP1,SYK,TIGIT,TNFAIP8L2,VNN1
GO:0002697	regulation of immune effector process	biological_process	27/414	341/19098	3.65256	7.73495e-09	8.56958e-07	27	C1QA,C1QB,C1QC,C1S,C2,C3,C3AR1,C4A,C4B,C5AR1,C6,CADM1,CFB,CR1,FCGR2B,HLA-DMB,IL18,IL6,IL7R,ITGAM,ITGB2,LEP,NR4A3,RAET1E,RASGRP1,SH2D1A,SYK
GO:0006897	endocytosis	biological_process	39/414	644/19098	2.79361	7.94562e-09	8.66325e-07	39	ABCA1,ACKR4,ADIPOQ,ADM,ADORA2A,ALB,ARC,ARPC5,C2,C3,C4A,C4B,CCL2,CD163L1,CD209,CD5,CLEC10A,DOCK2,FCGR2B,FOLR2,HSP90AA1,HSPH1,IGLL5,ITGAM,ITGB2,JCHAIN,LEP,LGALS3BP,MASP1,MRC1,PIK3R2,PPT1,SELE,SERPINE1,SFRP4,STON2,SYK,TGM2,THBS1
GO:0002696	positive regulation of leukocyte activation	biological_process	25/414	297/19098	3.88303	8.28273e-09	8.88969e-07	25	CCL2,CCL5,CD209,CD4,CD5,GPAM,GRAP2,HLA-DMB,HSPH1,IGLL5,IL18,IL1RL1,IL6,IL7R,ITGAM,ITGB2,LEP,MAP3K14,NR4A3,PNP,RASGRP1,SYK,THBS1,TLR6,VNN1
GO:0002274	myeloid leukocyte activation	biological_process	38/414	619/19098	2.83192	8.67028e-09	9.16248e-07	38	ADA2,ARPC5,C3,C3AR1,C5AR1,CCL5,CD53,CR1,CREG1,CTSS,CYBB,DOCK2,FCGR2B,GRN,HSP90AA1,HSPA1B,HSPA6,IL18,IL1RL1,IL31RA,ITGAM,ITGB2,MAN2B1,NR4A3,PNP,RAB37,RASGRP1,SERPINB1,SIRPA,SLC2A5,SLPI,SYK,THBS1,TLR6,TLR7,TLR8,TRPM2,VNN1
GO:0009986	cell surface	cellular_component	41/414	705/19098	2.68276	1.01944e-08	1.06099e-06	41	ABCA1,ABCG1,ADAMTS15,ADAMTS9,ADGRV1,ADIPOQ,AQP4,C5AR1,CD209,CD4,CD5,CD53,CHRNA1,CR1,CSF1R,CXCL9,F2R,FCGR2B,FOLR2,HHIP,IGLL5,IL12RB2,IL1RL1,IL31RA,IL7R,ITGA2B,ITGAM,ITGB2,ITGB6,KCNJ5,MRC1,MS4A2,NCAM1,SDC1,SFRP1,SFRP4,TDGF1,THBS1,TIGIT,TLR8,TREML1
GO:0002460	adaptive immune response based on somatic recombination of immune receptors built from immunoglobulin superfamily domains	biological_process	21/414	216/19098	4.4849	1.08012e-08	1.10736e-06	21	C1QA,C1QB,C1QC,C1S,C2,C3,C4A,C4B,C6,CD4,CR1,FCGR2B,IGLL5,IL18,IL1RL1,IL31RA,IL6,IL7R,RAET1E,TLR6,TLR8
GO:0002237	response to molecule of bacterial origin	biological_process	26/414	329/19098	3.64557	1.53326e-08	1.54882e-06	26	ABCA1,ACP5,ADM,ALPL,C4B,C5AR1,CCL2,CCL5,CSF3,CXCL3,CXCL9,F2R,FCGR2B,IL10RA,IL12RB2,IL18,IL6,LOXL1,MRC1,PCK1,PDE4B,PTGFR,SELE,SERPINE1,SLPI,TLR6
GO:0071310	cellular response to organic substance	biological_process	97/414	2584/19098	1.73168	2.54648e-08	2.53504e-06	97	ABCA1,ACKR4,ADIPOQ,AGTRAP,AKR1C1,AKR1C2,AKR1C3,ALPL,AQP1,AQP4,ARNTL,AVPR1A,CCL2,CCL5,CD4,CEBPA,CISH,CITED2,CLDN5,CLEC3B,CMA1,CSF1R,CSF3,CTSL,CTSS,CXCL3,CXCL9,CYBB,DDX11,DGAT2,DTX1,EXTL1,F13A1,FBN1,FCGR2B,FGF9,FOLR2,GOT1,GPAM,HDAC4,HHIP,HIST1H3B,HIST1H3C,HIST1H3F,HIST1H3I,HSP90AA1,HSPA1B,IL10RA,IL12RB2,IL18,IL1RL1,IL31RA,IL6,IL7R,ITGAM,ITGB2,KLB,KLF1,LEP,MAP2,MAP3K14,MPC1,MRC1,NCAM1,NOS1,NR4A3,OPR…
GO:0006887	exocytosis	biological_process	45/414	849/19098	2.44508	3.05768e-08	3.00046e-06	45	ADA2,ALB,ARPC5,C3,C3AR1,C5AR1,CALM1,CCL5,CD53,CLEC3B,CR1,CREG1,CTSS,CYBB,DOCK2,F13A1,FCGR2B,GRN,HSP90AA1,HSPA1B,HSPA6,ITGA2B,ITGAM,ITGB2,LGALS3BP,MAN2B1,NR4A3,NSF,PLEK,PNP,PRKCB,RAB37,RARRES2,RASGRP1,SDC1,SERPINB1,SERPINE1,SIRPA,SLC2A5,SLPI,SYK,THBS1,TRIM9,TRPM2,VNN1
GO:0030097	hemopoiesis	biological_process	45/414	852/19098	2.43647	3.39214e-08	3.23743e-06	45	ADIPOQ,BLNK,C1QC,CD4,CEBPA,CITED2,CR1,CSF1R,CSF3,DOCK2,DTX1,EPB42,FBN1,FCGR2B,HDAC4,HIST1H3B,HIST1H3C,HIST1H3F,HIST1H3I,HSPA1B,IL18,IL31RA,IL6,IL7R,ITGA2B,ITK,KLF1,LEP,LMO1,MLF1,NR4A3,PLEK,PNP,PRKCB,RASGRP1,SFRP1,STON2,SYK,THBS1,TMEM176A,TMEM176B,TOP2A,TRPM2,VNN1,ZNF385A
GO:0045055	regulated exocytosis	biological_process	41/414	736/19098	2.56977	3.39343e-08	3.23743e-06	41	ADA2,ALB,ARPC5,C3,C3AR1,C5AR1,CALM1,CD53,CLEC3B,CR1,CREG1,CTSS,CYBB,DOCK2,F13A1,FCGR2B,GRN,HSP90AA1,HSPA1B,HSPA6,ITGA2B,ITGAM,ITGB2,LGALS3BP,MAN2B1,NR4A3,PLEK,PNP,RAB37,RARRES2,RASGRP1,SERPINB1,SERPINE1,SIRPA,SLC2A5,SLPI,SYK,THBS1,TRIM9,TRPM2,VNN1
GO:0065008	regulation of biological quality	biological_process	124/414	3632/19098	1.57494	4.14446e-08	3.89977e-06	124	ABCA1,ABCB5,ABCG1,ACP5,ACVR1C,ADAMTS18,ADGRV1,ADIPOQ,ADM,ADORA2A,AGTRAP,AKR1C1,AKR1C2,AKR1C3,ALB,AQP1,AQP4,ARC,ARNTL,ARPC5,AVPR1A,BTC,C3,C3AR1,C5AR1,CALM1,CCL2,CCL5,CD4,CEBPA,CHRNA1,CITED2,CMA1,COL11A2,CP,CSF1R,CSF3,CSRP1,CSRP3,CXCL9,CYBB,DGAT2,DHRS7C,DSC2,ELN,EPB42,F13A1,F2R,F2RL3,FBN1,FCGR2B,FDXR,GLYAT,GOT1,GPAM,GPR174,HBD,HIST1H1B,HIST1H3B,HIST1H3C,HIST1H3F,HIST1H3I,HSP90AA1,HSPA1B,IL10RA,IL18…
GO:0048534	hematopoietic or lymphoid organ development	biological_process	46/414	891/19098	2.38159	4.65305e-08	4.30436e-06	46	ADIPOQ,BLNK,C1QC,CD248,CD4,CEBPA,CITED2,CR1,CSF1R,CSF3,DOCK2,DTX1,EPB42,FBN1,FCGR2B,HDAC4,HIST1H3B,HIST1H3C,HIST1H3F,HIST1H3I,HSPA1B,IL18,IL31RA,IL6,IL7R,ITGA2B,ITK,KLF1,LEP,LMO1,MLF1,NR4A3,PLEK,PNP,PRKCB,RASGRP1,SFRP1,STON2,SYK,THBS1,TMEM176A,TMEM176B,TOP2A,TRPM2,VNN1,ZNF385A
GO:0002526	acute inflammatory response	biological_process	17/414	155/19098	5.05947	4.69977e-08	4.30436e-06	17	C1QA,C1QB,C1QC,C1S,C2,C3,C3AR1,C4A,C4B,C5AR1,C6,CFB,CR1,FCGR2B,IL31RA,IL6,VNN1
GO:0048583	regulation of response to stimulus	biological_process	132/414	3962/19098	1.5369	5.33993e-08	4.82631e-06	132	ABCA1,ACP5,ACTN3,ADA2,ADAMTS18,ADIPOQ,ADM,ADORA2A,AKR1C2,AKR1C3,AOAH,ARC,ARHGAP20,ARHGAP36,ARNTL,ARPC5,BLNK,BTC,C1QA,C1QB,C1QC,C1S,C2,C3,C3AR1,C4A,C4B,C5AR1,C5orf30,C6,CADM1,CALM1,CCL2,CCL5,CD209,CD4,CFB,CISH,CITED2,CLEC10A,CMA1,CR1,CSF1R,CSF3,CTSL,CTSS,CXCL14,CXCL3,CXCL9,DDX11,DLK1,DNAJB1,DTX1,DUSP2,EFEMP1,F2R,F2RL3,FABP7,FBN1,FCGR2B,FGF9,GPAM,GPR37,GPRC5A,GRAP2,GRN,HDAC4,HHIP,HLA-DMB,HSP90AA1,H…
GO:0051249	regulation of lymphocyte activation	biological_process	28/414	399/19098	3.23722	5.49529e-08	4.90223e-06	28	ADORA2A,CCL2,CCL5,CD209,CD4,CD5,CR1,DTX1,FCGR2B,GPAM,GRAP2,HLA-DMB,HSPH1,IGLL5,IL18,IL6,IL7R,LEP,LMO1,MAP3K14,PNP,PRKAR1A,RASGRP1,SFRP1,SYK,TIGIT,TNFAIP8L2,VNN1
GO:0098609	cell-cell adhesion	biological_process	41/414	758/19098	2.49518	7.5981e-08	6.6912e-06	41	ADAMTS18,ADGRV1,ADIPOQ,ADORA2A,CADM1,CCL2,CCL5,CD209,CD4,CD5,CITED2,CLDN5,CSRP1,DSC2,DTX1,FAT3,FCGR2B,GPAM,GRAP2,HLA-DMB,HSPH1,IL18,IL6,IL7R,ITGA2B,ITGAM,ITGB2,LEP,MAP3K14,NR4A3,PLEK,PNP,PRKAR1A,RASGRP1,SELE,SELPLG,SYK,THBS4,TIGIT,TNFAIP8L2,VNN1
GO:0050900	leukocyte migration	biological_process	28/414	406/19098	3.18141	7.91558e-08	6.86071e-06	28	C3AR1,C5AR1,CCL2,CCL5,CH25H,CXCL14,CXCL3,CXCL9,IL6,ITGA2B,ITGAM,ITGB2,JCHAIN,LEP,PDE4B,PDGFD,PIK3R2,RARRES2,SDC1,SELE,SELPLG,SERPINE1,SIRPA,SLC7A10,SYK,THBS1,THBS4,TRPM2
GO:0007155	cell adhesion	biological_process	59/414	1316/19098	2.06816	7.99034e-08	6.86071e-06	59	ACTN3,ADAMTS18,ADAMTS9,ADGRV1,ADIPOQ,ADORA2A,CADM1,CCDC80,CCL2,CCL5,CD209,CD4,CD5,CHL1,CITED2,CLDN5,CSRP1,DSC2,DTX1,EGFL6,FAT3,FBN1,FCGR2B,GPAM,GRAP2,HLA-DMB,HSPH1,IL18,IL6,IL7R,ITGA2B,ITGAM,ITGB2,ITGB6,LEP,LGALS3BP,LYVE1,MAP3K14,NCAM1,NR4A3,PLEK,PNP,PRKAR1A,RASGRP1,RND1,SELE,SELPLG,SERPINE1,SFRP1,SIRPA,SPON1,SYK,TGM2,THBS1,THBS4,TIGIT,TNFAIP8L2,VNN1,WISP1
GO:2000427	positive regulation of apoptotic cell clearance	biological_process	5/414	7/19098	32.9503	9.46976e-08	8.03059e-06	5	C2,C3,C4A,C4B,CCL2
GO:0022610	biological adhesion	biological_process	59/414	1324/19098	2.05566	9.84943e-08	8.2507e-06	59	ACTN3,ADAMTS18,ADAMTS9,ADGRV1,ADIPOQ,ADORA2A,CADM1,CCDC80,CCL2,CCL5,CD209,CD4,CD5,CHL1,CITED2,CLDN5,CSRP1,DSC2,DTX1,EGFL6,FAT3,FBN1,FCGR2B,GPAM,GRAP2,HLA-DMB,HSPH1,IL18,IL6,IL7R,ITGA2B,ITGAM,ITGB2,ITGB6,LEP,LGALS3BP,LYVE1,MAP3K14,NCAM1,NR4A3,PLEK,PNP,PRKAR1A,RASGRP1,RND1,SELE,SELPLG,SERPINE1,SFRP1,SIRPA,SPON1,SYK,TGM2,THBS1,THBS4,TIGIT,TNFAIP8L2,VNN1,WISP1
GO:0006909	phagocytosis	biological_process	20/414	226/19098	4.08234	1.16202e-07	9.61674e-06	20	ABCA1,ADIPOQ,ADORA2A,ARPC5,C2,C3,C4A,C4B,CCL2,DOCK2,FCGR2B,HSP90AA1,IGLL5,ITGAM,ITGB2,LEP,PIK3R2,SYK,TGM2,THBS1
GO:1903039	positive regulation of leukocyte cell-cell adhesion	biological_process	19/414	207/19098	4.23419	1.36031e-07	1.11238e-05	19	CCL2,CCL5,CD209,CD4,CD5,GPAM,GRAP2,HLA-DMB,HSPH1,IL18,IL6,IL7R,LEP,MAP3K14,NR4A3,PNP,RASGRP1,SYK,VNN1
GO:0016192	vesicle-mediated transport	biological_process	75/414	1888/19098	1.83251	1.62884e-07	1.3163e-05	75	ABCA1,ACKR4,ADA2,ADAMTS9,ADIPOQ,ADM,ADORA2A,ALB,ARC,ARPC5,C2,C3,C3AR1,C4A,C4B,C5AR1,CALM1,CCL2,CCL5,CD163L1,CD209,CD5,CD53,CES1,CLEC10A,CLEC3B,CR1,CREG1,CTSS,CYBB,DOCK2,F13A1,FCGR2B,FOLR2,GRN,HSP90AA1,HSPA1B,HSPA6,HSPH1,IGLL5,ITGA2B,ITGAM,ITGB2,JCHAIN,LEP,LGALS3BP,MAN2B1,MASP1,MRC1,NR4A3,NSF,PIK3R2,PLEK,PNP,PPT1,PRKCB,RAB37,RARRES2,RASGRP1,SDC1,SELE,SERPINB1,SERPINE1,SFRP4,SIRPA,SLC2A5,SLPI,STON2…
GO:0002520	immune system development	biological_process	46/414	932/19098	2.27682	1.73045e-07	1.38214e-05	46	ADIPOQ,BLNK,C1QC,CD248,CD4,CEBPA,CITED2,CR1,CSF1R,CSF3,DOCK2,DTX1,EPB42,FBN1,FCGR2B,HDAC4,HIST1H3B,HIST1H3C,HIST1H3F,HIST1H3I,HSPA1B,IL18,IL31RA,IL6,IL7R,ITGA2B,ITK,KLF1,LEP,LMO1,MLF1,NR4A3,PLEK,PNP,PRKCB,RASGRP1,SFRP1,STON2,SYK,THBS1,TMEM176A,TMEM176B,TOP2A,TRPM2,VNN1,ZNF385A
GO:0051050	positive regulation of transport	biological_process	46/414	936/19098	2.26709	1.95679e-07	1.54497e-05	46	ABCA1,ABCG1,ADIPOQ,ADORA2A,AQP1,ARC,AVPR1A,C2,C3,C4A,C4B,CADM1,CALM1,CCL2,CCL5,CD4,CSF1R,CTSS,CXCL9,DOCK2,F2R,F2RL3,FCGR2B,IL1RL1,IL6,ITGAM,ITGB2,LEP,NBPF3,NOS1,NR4A3,PIK3R2,PLTP,PPT1,RARRES2,RASGRP1,RASL10B,SDC1,SELE,SERPINE1,SFRP4,SLC38A3,SYK,TLR8,TRPM2,TRPV3
GO:0009617	response to bacterium	biological_process	32/414	533/19098	2.76956	2.255e-07	1.76018e-05	32	ABCA1,ACP5,ADM,ALPL,C4B,C5AR1,CCL2,CCL5,CD4,CSF3,CXCL3,CXCL9,F2R,FCGR2B,IGLL5,IL10RA,IL12RB2,IL18,IL6,JCHAIN,LOXL1,MRC1,PCK1,PDE4B,PLA2G2A,PTGFR,RARRES2,SELE,SERPINE1,SLPI,SYK,TLR6
GO:0007599	hemostasis	biological_process	25/414	352/19098	3.27631	2.29241e-07	1.76928e-05	25	ADAMTS18,ADORA2A,CSRP1,F13A1,F2R,F2RL3,HBD,HIST1H3B,HIST1H3C,HIST1H3F,HIST1H3I,IL6,ITGA2B,PDGFD,PLEK,PRKAR1A,PRKAR2B,PRKCB,SERPINB2,SERPINE1,SYK,TFPI2,THBS1,TREML1,ZNF385A
GO:0031226	intrinsic component of plasma membrane	cellular_component	68/414	1663/19098	1.88627	2.4046e-07	1.83525e-05	68	ABCA1,ABCB5,ACKR4,ACVR1C,ADORA2A,AQP1,AQP4,AVPR1A,C3AR1,C5AR1,C6,CADM1,CD4,CD5,CD53,CD82,CHRNA1,CR1,CSF1R,CYBB,EMB,F2R,F2RL3,FCGR2B,FOLR2,GALNT8,GPR37,GPRC5A,HHIP,IL12RB2,IL6,ITGA2B,ITGAM,ITGB2,ITGB6,KCNA6,KCNA7,KCNJ5,KCNS3,KLB,LYVE1,MMD,MRC1,MS4A2,OPRD1,PALM,PTGFR,SCN9A,SDC1,SELE,SELPLG,SLC14A1,SLC25A4,SLC2A5,SLC38A3,SLC39A14,SLC4A1,SLC6A6,SLC7A10,SLCO4A1,STEAP3,TGM2,TIGIT,TLR6,TLR8,TRPM2,TRPV3,…
GO:0030155	regulation of cell adhesion	biological_process	35/414	619/19098	2.60834	2.53794e-07	1.91572e-05	35	ADAMTS18,ADIPOQ,ADORA2A,CCDC80,CCL2,CCL5,CD209,CD4,CD5,CITED2,DTX1,EGFL6,FCGR2B,GPAM,GRAP2,HLA-DMB,HSPH1,IL18,IL6,IL7R,LEP,MAP3K14,NR4A3,PNP,PRKAR1A,RASGRP1,RND1,SERPINE1,SFRP1,SYK,TGM2,THBS1,TIGIT,TNFAIP8L2,VNN1
GO:0001848	complement binding	molecular_function	7/414	22/19098	14.6779	2.75304e-07	2.0555e-05	7	C4A,C4B,C5AR1,CFB,CR1,ITGAM,ITGB2
GO:0005887	integral component of plasma membrane	cellular_component	66/414	1601/19098	1.90169	2.78489e-07	2.05692e-05	66	ABCA1,ABCB5,ACKR4,ACVR1C,ADORA2A,AQP1,AQP4,AVPR1A,C3AR1,C5AR1,C6,CADM1,CD4,CD5,CD53,CD82,CHRNA1,CR1,CSF1R,CYBB,EMB,F2R,F2RL3,FCGR2B,GALNT8,GPR37,GPRC5A,HHIP,IL12RB2,IL6,ITGA2B,ITGAM,ITGB2,ITGB6,KCNA6,KCNA7,KCNJ5,KCNS3,KLB,LYVE1,MMD,MRC1,MS4A2,OPRD1,PALM,PTGFR,SCN9A,SDC1,SELE,SELPLG,SLC14A1,SLC25A4,SLC2A5,SLC38A3,SLC39A14,SLC4A1,SLC6A6,SLC7A10,SLCO4A1,STEAP3,TIGIT,TLR6,TLR8,TRPM2,TRPV3,VIPR2
GO:0051049	regulation of transport	biological_process	71/414	1774/19098	1.84626	2.81483e-07	2.05692e-05	71	ABCA1,ABCG1,ACVR1C,ADIPOQ,ADORA2A,AQP1,ARC,ARNTL,AVPR1A,C2,C3,C4A,C4B,CADM1,CALM1,CCL2,CCL5,CD4,CLIC6,CSF1R,CTSS,CXCL9,CYBB,DHRS7C,DOCK2,F2R,F2RL3,FCGR2B,GABRE,GALNT8,GPAM,IL1RL1,IL6,ITGAM,ITGB2,KCNA6,KCNA7,KCNJ5,KCNS3,LEP,MPV17L,NBPF3,NOS1,NR4A3,NSF,OPRD1,PDE4B,PIK3R2,PLTP,PPT1,PRKCB,RAB37,RARRES2,RASGRP1,RASL10B,SCN9A,SDC1,SELE,SERPINE1,SFRP1,SFRP4,SLC25A4,SLC38A3,STON2,SYK,THBS1,TLR6,TLR8,TRIM…
GO:0022409	positive regulation of cell-cell adhesion	biological_process	20/414	240/19098	3.8442	3.08476e-07	2.23044e-05	20	CCL2,CCL5,CD209,CD4,CD5,CITED2,GPAM,GRAP2,HLA-DMB,HSPH1,IL18,IL6,IL7R,LEP,MAP3K14,NR4A3,PNP,RASGRP1,SYK,VNN1
GO:0050870	positive regulation of T cell activation	biological_process	18/414	198/19098	4.19368	3.35815e-07	2.40282e-05	18	CCL2,CCL5,CD209,CD4,CD5,GPAM,GRAP2,HLA-DMB,HSPH1,IL18,IL6,IL7R,LEP,MAP3K14,PNP,RASGRP1,SYK,VNN1
GO:0009636	response to toxic substance	biological_process	30/414	489/19098	2.83009	3.45098e-07	2.44379e-05	30	ADIPOQ,ADORA2A,ALB,AQP1,CCL5,CES1,CHRNA1,CLDN5,CSF3,CYBB,DDX11,FOSL1,GLYAT,GPR37,GPX3,HSPH1,IL6,LEP,NQO1,NR4A3,OPRD1,PDGFD,PPP1R1B,PTGS1,PXDNL,SCN9A,SDC1,SRXN1,TRPM2,TXNRD1
GO:0016064	immunoglobulin mediated immune response	biological_process	13/414	103/19098	5.82229	3.53844e-07	2.48016e-05	13	C1QA,C1QB,C1QC,C1S,C2,C3,C4A,C4B,C6,CR1,FCGR2B,IGLL5,TLR8
GO:0032496	response to lipopolysaccharide	biological_process	23/414	312/19098	3.40064	3.65168e-07	2.53367e-05	23	ABCA1,ACP5,ADM,ALPL,C5AR1,CCL2,CCL5,CSF3,CXCL3,CXCL9,F2R,IL10RA,IL12RB2,IL18,IL6,LOXL1,MRC1,PCK1,PDE4B,PTGFR,SELE,SERPINE1,SLPI
GO:0043062	extracellular structure organization	biological_process	26/414	387/19098	3.0992	3.85331e-07	2.64684e-05	26	ABCA1,ABCG1,ADAMTS4,ADAMTS9,ALB,CCDC80,CMA1,COL11A1,COL11A2,CTSL,CTSS,EGFL6,ELN,FBN1,ITGA2B,ITGAM,ITGB2,ITGB6,LOXL1,MMP19,PLA2G2A,PLTP,SDC1,SERPINE1,THBS1,THBS4
GO:0042119	neutrophil activation	biological_process	30/414	492/19098	2.81283	3.92811e-07	2.67049e-05	30	ADA2,ARPC5,C3,C3AR1,C5AR1,CCL5,CD53,CR1,CREG1,CTSS,CYBB,DOCK2,FCGR2B,GRN,HSP90AA1,HSPA1B,HSPA6,IL18,ITGAM,ITGB2,MAN2B1,PNP,RAB37,SERPINB1,SIRPA,SLC2A5,SLPI,SYK,TRPM2,VNN1
GO:0019724	B cell mediated immunity	biological_process	13/414	104/19098	5.7663	3.9655e-07	2.67049e-05	13	C1QA,C1QB,C1QC,C1S,C2,C3,C4A,C4B,C6,CR1,FCGR2B,IGLL5,TLR8
GO:0098552	side of membrane	cellular_component	28/414	441/19098	2.92892	4.31907e-07	2.88036e-05	28	ABCA1,ABCG1,AQP4,BDH1,CD209,CD4,CD5,CXCL9,FCGR2B,FOLR2,GRAP2,IGLL5,IL12RB2,IL1RL1,IL31RA,IL7R,ITGA2B,ITGAM,ITGB2,ITGB6,ITK,KCNJ5,MS4A2,NCAM1,SDC1,SYK,THBS1,TLR8
GO:0036230	granulocyte activation	biological_process	30/414	498/19098	2.77894	5.07137e-07	3.34954e-05	30	ADA2,ARPC5,C3,C3AR1,C5AR1,CCL5,CD53,CR1,CREG1,CTSS,CYBB,DOCK2,FCGR2B,GRN,HSP90AA1,HSPA1B,HSPA6,IL18,ITGAM,ITGB2,MAN2B1,PNP,RAB37,SERPINB1,SIRPA,SLC2A5,SLPI,SYK,TRPM2,VNN1
GO:0042110	T cell activation	biological_process	28/414	445/19098	2.90259	5.17773e-07	3.38722e-05	28	ADORA2A,CCL2,CCL5,CD209,CD4,CD5,CR1,DOCK2,DTX1,FCGR2B,GPAM,GRAP2,HLA-DMB,HSPH1,IL18,IL6,IL7R,ITK,LEP,LMO1,MAP3K14,PNP,PRKAR1A,RASGRP1,SYK,TIGIT,TNFAIP8L2,VNN1
GO:0033993	response to lipid	biological_process	44/414	907/19098	2.23786	5.24807e-07	3.40085e-05	44	ABCA1,ABCG1,ACP5,ADIPOQ,ADM,AKR1C2,AKR1C3,ALPL,AQP1,ARNTL,AVPR1A,C5AR1,CCL2,CCL5,CD4,CSF3,CXCL3,CXCL9,CYBB,DGAT2,F2R,FOSL1,GOT1,GPAM,IL10RA,IL12RB2,IL18,IL6,LEP,LOXL1,MRC1,NQO1,NR4A3,PCK1,PDE4B,PTGFR,RXRG,S100B,SDC1,SELE,SERPINE1,SFRP1,SLPI,THBS1
GO:2000425	regulation of apoptotic cell clearance	biological_process	5/414	9/19098	25.628	5.48105e-07	3.51863e-05	5	C2,C3,C4A,C4B,CCL2
GO:0099503	secretory vesicle	cellular_component	45/414	940/19098	2.20837	5.56565e-07	3.53986e-05	45	ADA2,ALB,ARC,ARPC5,C3,C3AR1,C5AR1,CD53,CLEC3B,CMA1,CR1,CREG1,CTSS,CYBB,DOCK2,F13A1,GRN,HSP90AA1,HSPA1B,HSPA6,ITGA2B,ITGAM,ITGB2,LGALS3BP,LOXL1,MAN2B1,PDE4B,PLA2G2A,PNP,PPT1,PRKCB,RAB37,RAB40C,RARRES2,SERPINB1,SERPINE1,SIRPA,SLC2A5,SLPI,STON2,THBS1,TREML1,TRIM9,TRPM2,VNN1
GO:0009719	response to endogenous stimulus	biological_process	64/414	1568/19098	1.88287	6.15493e-07	3.87874e-05	64	ABCA1,ABCG1,ACVR1C,ADIPOQ,ADM,AGTRAP,AKR1C1,AKR1C2,AKR1C3,ALPL,AQP1,ARNTL,AVPR1A,CCL2,CCL5,CD4,CISH,CITED2,CLDN5,CLEC3B,CTSL,CTSS,CYBB,DDX11,FBN1,FCGR2B,FGF9,FOLR2,FOSL1,GOT1,GPAM,HDAC4,HHIP,IL6,ITGB2,KLB,KLF1,LEP,MMP19,NQO1,NR4A3,PCK1,PDE4B,PDGFD,PIK3R2,PRKAR1A,PRKAR2B,PRKCB,PTGFR,RARRES2,RXRG,S100B,SDC1,SFRP1,SFRP4,SHISA2,SYK,TDGF1,THBS1,TLR6,TNMD,TRPM2,TUSC5,WFIKKN1
GO:0007596	blood coagulation	biological_process	24/414	347/19098	3.19058	6.4705e-07	4.04053e-05	24	ADAMTS18,ADORA2A,CSRP1,F13A1,F2R,F2RL3,HBD,HIST1H3B,HIST1H3C,HIST1H3F,HIST1H3I,IL6,ITGA2B,PDGFD,PLEK,PRKAR1A,PRKAR2B,PRKCB,SERPINB2,SERPINE1,SYK,TFPI2,THBS1,TREML1
GO:0032879	regulation of localization	biological_process	91/414	2549/19098	1.64687	7.63049e-07	4.72197e-05	91	ABCA1,ABCG1,ACVR1C,ADAMTS9,ADIPOQ,ADORA2A,AQP1,ARC,ARNTL,AVPR1A,BTC,C2,C3,C3AR1,C4A,C4B,C5AR1,C5orf30,CADM1,CALM1,CCL2,CCL5,CD4,CITED2,CLIC6,CSF1R,CTSS,CXCL14,CXCL3,CXCL9,CYBB,DHRS7C,DOCK2,DSC2,F2R,F2RL3,FCGR2B,GABRE,GALNT8,GPAM,HDAC4,HSPH1,IL1RL1,IL6,ITGA2B,ITGAM,ITGB2,KCNA6,KCNA7,KCNJ5,KCNS3,LEP,MMD,MPV17L,NBPF3,NOS1,NR4A3,NSF,OPRD1,PDE4B,PDGFD,PIK3R2,PLTP,PPT1,PRKCB,PTP4A3,PYHIN1,RAB37,RARRES2…
GO:0050817	coagulation	biological_process	24/414	352/19098	3.14526	8.35675e-07	5.12523e-05	24	ADAMTS18,ADORA2A,CSRP1,F13A1,F2R,F2RL3,HBD,HIST1H3B,HIST1H3C,HIST1H3F,HIST1H3I,IL6,ITGA2B,PDGFD,PLEK,PRKAR1A,PRKAR2B,PRKCB,SERPINB2,SERPINE1,SYK,TFPI2,THBS1,TREML1
GO:0001816	cytokine production	biological_process	36/414	682/19098	2.43504	8.78427e-07	5.30077e-05	36	ABCA1,ACP5,ADIPOQ,C3,C3AR1,C5AR1,C5orf30,CADM1,CD4,CMA1,CSF1R,CYBB,F2R,FCGR2B,GPAM,HSPA1B,IL12RB2,IL18,IL1RL1,IL31RA,IL6,ITGB6,ITK,LEP,NR4A3,PDE4B,PNP,RASGRP1,SERPINE1,SPHK1,SYK,THBS1,TIGIT,TLR6,TLR7,TLR8
GO:0002444	myeloid leukocyte mediated immunity	biological_process	31/414	539/19098	2.65314	8.79732e-07	5.30077e-05	31	ADA2,ARPC5,C3,C3AR1,C5AR1,CD53,CR1,CREG1,CTSS,CYBB,DOCK2,FCGR2B,GRN,HSP90AA1,HSPA1B,HSPA6,IL6,ITGAM,ITGB2,MAN2B1,NR4A3,PNP,RAB37,RASGRP1,SERPINB1,SIRPA,SLC2A5,SLPI,SYK,TRPM2,VNN1
GO:0034097	response to cytokine	biological_process	51/414	1149/19098	2.04756	9.05034e-07	5.40581e-05	51	ACKR4,ACP5,ADIPOQ,AQP4,CCL2,CCL5,CD4,CEBPA,CISH,CSF1R,CSF3,CXCL3,CXCL9,DTX1,F13A1,FOSL1,HDAC4,HIST1H3B,HIST1H3C,HIST1H3F,HIST1H3I,HSP90AA1,HSPA1B,IL10RA,IL12RB2,IL18,IL1RL1,IL31RA,IL6,IL7R,ITGAM,ITGB2,LEP,MAP3K14,MPC1,MRC1,NCAM1,OPRD1,PCK1,PTP4A3,PYHIN1,RFFL,SDC1,SELE,SELPLG,SERPINB2,SFRP1,SPHK1,SYK,TDGF1,THBS1
GO:0046649	lymphocyte activation	biological_process	34/414	628/19098	2.49751	1.01781e-06	6.00998e-05	34	ADORA2A,BLNK,CCL2,CCL5,CD209,CD4,CD5,CR1,DOCK2,DTX1,FCGR2B,GPAM,GRAP2,HDAC4,HLA-DMB,HSPH1,IGLL5,IL18,IL6,IL7R,ITGB2,ITK,LEP,LMO1,MAP3K14,PNP,PRKAR1A,PRKCB,RASGRP1,SFRP1,SYK,TIGIT,TNFAIP8L2,VNN1
GO:0044459	plasma membrane part	cellular_component	94/414	2679/19098	1.61861	1.02368e-06	6.00998e-05	94	ABCA1,ABCB5,ABCG1,ACKR4,ACVR1C,ADORA2A,AQP1,AQP4,ARC,AVPR1A,C3AR1,C5AR1,C6,CADM1,CD209,CD4,CD5,CD53,CD82,CHRNA1,CLDN5,CR1,CSF1R,CXCL9,CYBB,EMB,F2R,F2RL3,FCGR2B,FOLR2,FOSL1,GABRE,GALNT8,GPR37,GPRC5A,GRAP2,HHIP,HLA-DMB,HLA-DQB1,HSP90AA1,IGLL5,IL12RB2,IL1RL1,IL31RA,IL6,IL7R,ITGA2B,ITGAM,ITGB2,ITGB6,ITK,KCNA6,KCNA7,KCNJ5,KCNS3,KLB,LIPE,LYVE1,MMD,MRC1,MS4A2,NAIP,NCAM1,NOS1,OPRD1,PALM,PDE4B,PLEK,PRKAR1…
GO:0007154	cell communication	biological_process	186/414	6432/19098	1.334	1.0338e-06	6.01793e-05	186	ABCA1,ACKR4,ACTN3,ACVR1C,ADA2,ADAMTS18,ADGRV1,ADIPOQ,ADM,ADORA2A,AGTRAP,AKR1C2,AKR1C3,ALB,ARC,ARHGAP20,ARHGAP36,ARNTL,ARPC5,ASB14,ASB18,AVPR1A,BLNK,BTC,C1QA,C3,C3AR1,C5AR1,CALM1,CCL2,CCL5,CD209,CD4,CD5,CD53,CD82,CDS1,CEBPA,CHL1,CHRNA1,CISH,CITED2,CLDN5,CLEC10A,CR1,CSF1R,CSF3,CTSL,CTSS,CXCL14,CXCL3,CXCL9,CYBB,DDX11,DLK1,DOCK2,DSC2,DTX1,DUSP2,E2F2,E2F8,EFEMP1,EVI2A,EXTL1,F13A1,F2R,F2RL3,FBN1,FCGR2B…
GO:0071345	cellular response to cytokine stimulus	biological_process	48/414	1065/19098	2.07912	1.27598e-06	7.36528e-05	48	ACKR4,ADIPOQ,AQP4,CCL2,CCL5,CD4,CEBPA,CISH,CSF1R,CSF3,CXCL3,CXCL9,DTX1,F13A1,HDAC4,HIST1H3B,HIST1H3C,HIST1H3F,HIST1H3I,HSP90AA1,HSPA1B,IL10RA,IL12RB2,IL18,IL1RL1,IL31RA,IL6,IL7R,ITGAM,ITGB2,LEP,MAP3K14,MPC1,MRC1,NCAM1,OPRD1,PCK1,PTP4A3,PYHIN1,RFFL,SDC1,SELPLG,SERPINB2,SFRP1,SPHK1,SYK,TDGF1,THBS1
GO:1902533	positive regulation of intracellular signal transduction	biological_process	45/414	970/19098	2.14007	1.30717e-06	7.48249e-05	45	ADIPOQ,AKR1C2,AKR1C3,BTC,C5AR1,CALM1,CCL2,CCL5,CD4,CSF1R,CSF3,CXCL9,F2R,F2RL3,FCGR2B,FGF9,GPR37,HSP90AA1,HSPA1B,IL18,IL31RA,IL6,IL7R,KLB,LEP,LMCD1,MAP3K14,NOS1,PDGFD,PIK3AP1,PIK3R2,PLA2G2A,PRKCB,PTP4A3,PYHIN1,RASGRP1,S100B,SPHK1,SYK,TDGF1,TGM2,THBS1,TLR6,TLR7,ZNF385A
GO:0005102	signaling receptor binding	molecular_function	61/414	1500/19098	1.87597	1.32776e-06	7.53751e-05	61	ABCA1,ACTN3,ADA2,ADAMTS8,ADIPOQ,ADM,ADORA2A,ARNTL,AVPR1A,BLNK,BTC,C3,CADM1,CCL2,CCL5,CD4,CSF3,CXCL14,CXCL3,CXCL9,DOCK2,DTX1,EFEMP1,EGFL6,F2R,FBN1,FGF9,GRAP2,GRN,HSPA1B,IGLL5,IL18,IL6,ITGB6,JCHAIN,KLB,LEP,MARCH1,MPV17L,NR4A3,NSF,PALM,PDGFD,PIK3R2,PPP1R1B,PRKCB,RAET1E,RARRES2,RND1,S100B,SELPLG,SERPINE1,SFRP1,SYK,TDGF1,THBS1,THBS4,TIGIT,TLR6,WFIKKN1,WISP1
GO:0043299	leukocyte degranulation	biological_process	30/414	527/19098	2.62602	1.63624e-06	9.21257e-05	30	ADA2,ARPC5,C3,C3AR1,C5AR1,CD53,CR1,CREG1,CTSS,CYBB,DOCK2,FCGR2B,GRN,HSP90AA1,HSPA1B,HSPA6,ITGAM,ITGB2,MAN2B1,NR4A3,PNP,RAB37,RASGRP1,SERPINB1,SIRPA,SLC2A5,SLPI,SYK,TRPM2,VNN1
GO:0030141	secretory granule	cellular_component	40/414	824/19098	2.23934	1.75643e-06	9.80885e-05	40	ADA2,ALB,ARC,ARPC5,C3,C3AR1,C5AR1,CD53,CLEC3B,CMA1,CR1,CREG1,CTSS,CYBB,DOCK2,F13A1,GRN,HSP90AA1,HSPA1B,HSPA6,ITGA2B,ITGAM,ITGB2,LGALS3BP,LOXL1,MAN2B1,PLA2G2A,PNP,RAB37,RAB40C,RARRES2,SERPINB1,SERPINE1,SIRPA,SLC2A5,SLPI,THBS1,TREML1,TRPM2,VNN1
GO:0030595	leukocyte chemotaxis	biological_process	17/414	200/19098	3.92109	1.81632e-06	0.000100615	17	C3AR1,C5AR1,CCL2,CCL5,CH25H,CXCL14,CXCL3,CXCL9,IL6,ITGB2,PDE4B,RARRES2,SERPINE1,SYK,THBS1,THBS4,TRPM2
GO:1901342	regulation of vasculature development	biological_process	21/414	294/19098	3.29503	1.95612e-06	0.000107492	21	ADAMTS9,ADM,AQP1,C3,C3AR1,C5AR1,C6,CMA1,CYBB,E2F2,IL6,ITGB2,LEP,PDGFD,PRKCB,SERPINE1,SFRP1,SPHK1,THBS1,THBS4,TNMD
GO:1903706	regulation of hemopoiesis	biological_process	27/414	449/19098	2.77399	1.9726e-06	0.000107538	27	ADIPOQ,C1QC,CD4,CR1,CSF3,DTX1,FBN1,FCGR2B,HIST1H3B,HIST1H3C,HIST1H3F,HIST1H3I,HSPA1B,IL18,IL7R,ITGA2B,LMO1,NR4A3,PNP,PRKCB,RASGRP1,SFRP1,SYK,THBS1,TMEM176A,TMEM176B,VNN1
GO:0050878	regulation of body fluid levels	biological_process	29/414	505/19098	2.64907	2.06015e-06	0.000111427	29	ADAMTS18,ADM,ADORA2A,AQP1,AQP4,BTC,CSRP1,F13A1,F2R,F2RL3,HBD,HIST1H3B,HIST1H3C,HIST1H3F,HIST1H3I,IL6,ITGA2B,PDGFD,PLEK,PRKAR1A,PRKAR2B,PRKCB,SERPINB2,SERPINE1,SYK,TFPI2,THBS1,TREML1,ZNF385A
GO:0045765	regulation of angiogenesis	biological_process	20/414	271/19098	3.40446	2.084e-06	0.000111836	20	ADAMTS9,ADM,AQP1,C3,C3AR1,C5AR1,C6,CMA1,CYBB,E2F2,IL6,ITGB2,LEP,PRKCB,SERPINE1,SFRP1,SPHK1,THBS1,THBS4,TNMD
GO:0002687	positive regulation of leukocyte migration	biological_process	13/414	121/19098	4.95616	2.2807e-06	0.000121443	13	C3AR1,C5AR1,CCL5,CXCL14,CXCL3,CXCL9,IL6,ITGA2B,PDGFD,RARRES2,SERPINE1,THBS1,THBS4
GO:0018108	peptidyl-tyrosine phosphorylation	biological_process	24/414	374/19098	2.96024	2.42666e-06	0.000128221	24	ADIPOQ,BTC,CCL5,CD4,CSF1R,CSF3,EFEMP1,FGF9,GPRC5A,GRAP2,HSP90AA1,HSPH1,IL12RB2,IL18,IL31RA,IL6,ITGB2,ITK,LEP,PDGFD,SFRP1,SYK,TDGF1,THBS4
GO:0002690	positive regulation of leukocyte chemotaxis	biological_process	11/414	86/19098	5.9004	2.47464e-06	0.000129758	11	C3AR1,C5AR1,CCL5,CXCL14,CXCL3,CXCL9,IL6,RARRES2,SERPINE1,THBS1,THBS4
GO:0045785	positive regulation of cell adhesion	biological_process	24/414	375/19098	2.95235	2.54158e-06	0.000132258	24	CCDC80,CCL2,CCL5,CD209,CD4,CD5,CITED2,EGFL6,GPAM,GRAP2,HLA-DMB,HSPH1,IL18,IL6,IL7R,LEP,MAP3K14,NR4A3,PNP,RASGRP1,SFRP1,SYK,TGM2,VNN1
GO:0002521	leukocyte differentiation	biological_process	28/414	483/19098	2.67423	2.58596e-06	0.000133556	28	ADIPOQ,BLNK,C1QC,CD4,CEBPA,CITED2,CR1,CSF1R,CSF3,DOCK2,DTX1,FBN1,FCGR2B,HDAC4,IL18,IL31RA,IL6,IL7R,ITK,LEP,PNP,RASGRP1,SFRP1,SYK,TMEM176A,TMEM176B,TRPM2,VNN1
GO:0017171	serine hydrolase activity	molecular_function	18/414	228/19098	3.64188	2.6178e-06	0.000134191	18	C1QA,C1QB,C1QC,C1S,C2,C3,C4A,C4B,CFB,CMA1,CPVL,CTSL,CTSS,LIPE,MASP1,MMP19,PRSS42,TPSB2
GO:0018212	peptidyl-tyrosine modification	biological_process	24/414	377/19098	2.93669	2.78649e-06	0.000140746	24	ADIPOQ,BTC,CCL5,CD4,CSF1R,CSF3,EFEMP1,FGF9,GPRC5A,GRAP2,HSP90AA1,HSPH1,IL12RB2,IL18,IL31RA,IL6,ITGB2,ITK,LEP,PDGFD,SFRP1,SYK,TDGF1,THBS4
GO:0048518	positive regulation of biological process	biological_process	163/414	5531/19098	1.35948	2.78664e-06	0.000140746	163	ABCA1,ABCG1,ACTN3,ACVR1C,ADAMTS9,ADIPOQ,ADM,ADORA2A,AKR1C2,AKR1C3,AQP1,ARC,ARNTL,ARPC5,AVPR1A,BLNK,BTC,C1QA,C1QB,C1QC,C1S,C2,C3,C3AR1,C4A,C4B,C5AR1,C6,CADM1,CALM1,CCDC80,CCL2,CCL5,CD209,CD248,CD4,CD5,CD53,CEBPA,CFB,CITED2,CLDN5,CLEC10A,CLEC3B,CMA1,CR1,CREB5,CSF1R,CSF3,CSRP3,CTSL,CTSS,CXCL14,CXCL3,CXCL9,CYBB,DCUN1D4,DDX11,DGAT2,DOCK2,E2F2,E2F8,EGFL6,ERCC5,F2R,F2RL3,FCGR2B,FGF9,FOLR2,FOSL1,GPAM,GPR…
GO:0001819	positive regulation of cytokine production	biological_process	25/414	406/19098	2.84054	3.12726e-06	0.000156797	25	ADIPOQ,C3,C3AR1,C5AR1,CADM1,CD4,CSF1R,CYBB,F2R,HSPA1B,IL12RB2,IL18,IL1RL1,IL6,LEP,NR4A3,PDE4B,RASGRP1,SERPINE1,SYK,THBS1,TIGIT,TLR6,TLR7,TLR8
GO:0010759	positive regulation of macrophage chemotaxis	biological_process	5/414	12/19098	19.221	3.26442e-06	0.000162488	5	C3AR1,C5AR1,CCL5,RARRES2,THBS1
GO:0002688	regulation of leukocyte chemotaxis	biological_process	12/414	107/19098	5.17351	3.55651e-06	0.000175753	12	C3AR1,C5AR1,CCL2,CCL5,CXCL14,CXCL3,CXCL9,IL6,RARRES2,SERPINE1,THBS1,THBS4
GO:0016485	protein processing	biological_process	19/414	259/19098	3.38409	4.08971e-06	0.000200659	19	C1QA,C1QB,C1QC,C1S,C2,C3,C3AR1,C4A,C4B,C5AR1,C6,CFB,CLEC3B,CMA1,CR1,CTSS,NAIP,SERPINE1,THBS1
GO:0002446	neutrophil mediated immunity	biological_process	28/414	495/19098	2.6094	4.13015e-06	0.000201206	28	ADA2,ARPC5,C3,C3AR1,C5AR1,CD53,CR1,CREG1,CTSS,CYBB,DOCK2,GRN,HSP90AA1,HSPA1B,HSPA6,IL6,ITGAM,ITGB2,MAN2B1,PNP,RAB37,SERPINB1,SIRPA,SLC2A5,SLPI,SYK,TRPM2,VNN1
GO:0007165	signal transduction	biological_process	171/414	5909/19098	1.33496	4.22972e-06	0.000204605	171	ABCA1,ACKR4,ACTN3,ACVR1C,ADA2,ADAMTS18,ADGRV1,ADIPOQ,ADM,ADORA2A,AGTRAP,AKR1C2,AKR1C3,ARC,ARHGAP20,ARHGAP36,ARNTL,ARPC5,ASB14,ASB18,AVPR1A,BLNK,BTC,C3,C3AR1,C5AR1,CALM1,CCL2,CCL5,CD209,CD4,CD5,CD53,CD82,CDS1,CEBPA,CHL1,CHRNA1,CISH,CITED2,CLDN5,CLEC10A,CR1,CSF1R,CSF3,CTSL,CTSS,CXCL14,CXCL3,CXCL9,CYBB,DDX11,DLK1,DOCK2,DTX1,DUSP2,E2F2,E2F8,EFEMP1,EVI2A,EXTL1,F13A1,F2R,F2RL3,FBN1,FCGR2B,FGF9,GABRE,GO…
GO:0051251	positive regulation of lymphocyte activation	biological_process	19/414	261/19098	3.35815	4.57385e-06	0.000219705	19	CCL2,CCL5,CD209,CD4,CD5,GPAM,GRAP2,HLA-DMB,HSPH1,IGLL5,IL18,IL6,IL7R,LEP,MAP3K14,PNP,RASGRP1,SYK,VNN1
GO:0001525	angiogenesis	biological_process	27/414	470/19098	2.65005	4.62865e-06	0.000220793	27	ADAMTS9,ADM,AQP1,C3,C3AR1,C5AR1,C6,CCL2,CMA1,CYBB,E2F2,E2F8,FGF9,IL18,IL6,ITGB2,LEP,MMP19,PRKCB,SERPINE1,SFRP1,SPHK1,SYK,TDGF1,THBS1,THBS4,TNMD
GO:1905523	positive regulation of macrophage migration	biological_process	5/414	13/19098	17.7425	5.21031e-06	0.000246825	5	C3AR1,C5AR1,CCL5,RARRES2,THBS1
GO:0044283	small molecule biosynthetic process	biological_process	36/414	740/19098	2.24418	5.64795e-06	0.000265725	36	ABCG1,ACSS1,ACTN3,ADA2,ADIPOQ,ADM,AKR1C3,AVPR1A,BCAT1,BDH1,CES1,CH25H,COQ10A,DGAT2,FDXR,GOT1,GPAM,GPT2,HDAC4,HPGDS,LEP,NME1-NME2,OSBPL3,OSBPL6,PCK1,PDE4B,PDE4C,PGAM2,PLEK,PLTP,PNP,PRKAG3,PTGS1,SPHK1,SYK,TECRL
GO:0003014	renal system process	biological_process	12/414	112/19098	4.94255	5.74948e-06	0.000268661	12	ADIPOQ,ADM,ADORA2A,AKR1C3,AQP1,AQP4,AVPR1A,BTC,F2R,JCHAIN,PRKAR1A,PRKAR2B
GO:0051246	regulation of protein metabolic process	biological_process	92/414	2714/19098	1.56374	5.93944e-06	0.000275662	92	ACVR1C,ADIPOQ,ADORA2A,AQP1,ARNTL,C1QA,C1QB,C1QC,C1S,C2,C3,C3AR1,C4A,C4B,C5AR1,C6,CALM1,CCL2,CCL5,CD4,CEBPA,CFB,CISH,CLEC3B,CR1,CSF1R,CSF3,CST7,CYBB,DCUN1D4,DGAT2,DUSP2,F2R,FCGR2B,FGF9,FOLR2,GPR37,GPRC5A,HDAC4,HIST1H1B,HIST1H3B,HIST1H3C,HIST1H3F,HIST1H3I,HSP90AA1,HSPA1B,HSPH1,IL18,IL31RA,IL6,ITGB2,KLB,LEP,LONRF3,MAP3K14,MDM4,MMD,NAIP,NOS1,NSF,OPRD1,PDGFD,PIK3R2,PLA2G2A,PPP1R1B,PPP1R3C,PRKAR1A,PRKA…
GO:0002275	myeloid cell activation involved in immune response	biological_process	29/414	534/19098	2.50521	6.1142e-06	0.000281161	29	ADA2,ARPC5,C3,C3AR1,C5AR1,CD53,CR1,CREG1,CTSS,CYBB,DOCK2,GRN,HSP90AA1,HSPA1B,HSPA6,ITGAM,ITGB2,MAN2B1,NR4A3,PNP,RAB37,RASGRP1,SERPINB1,SIRPA,SLC2A5,SLPI,SYK,TRPM2,VNN1
GO:0004252	serine-type endopeptidase activity	molecular_function	16/414	196/19098	3.76575	6.13979e-06	0.000281161	16	C1QA,C1QB,C1QC,C1S,C2,C3,C4A,C4B,CFB,CMA1,CTSL,CTSS,MASP1,MMP19,PRSS42,TPSB2
GO:0043312	neutrophil degranulation	biological_process	27/414	480/19098	2.59484	6.80749e-06	0.000309673	27	ADA2,ARPC5,C3,C3AR1,C5AR1,CD53,CR1,CREG1,CTSS,CYBB,DOCK2,GRN,HSP90AA1,HSPA1B,HSPA6,ITGAM,ITGB2,MAN2B1,PNP,RAB37,SERPINB1,SIRPA,SLC2A5,SLPI,SYK,TRPM2,VNN1
GO:0097237	cellular response to toxic substance	biological_process	17/414	221/19098	3.54849	7.01372e-06	0.000316956	17	ALB,AQP1,CYBB,DDX11,GPR37,GPX3,HSPH1,IL6,NQO1,NR4A3,OPRD1,PDGFD,PTGS1,PXDNL,SRXN1,TRPM2,TXNRD1
GO:0006898	receptor-mediated endocytosis	biological_process	19/414	269/19098	3.25828	7.07179e-06	0.000317491	19	ACKR4,ADM,ALB,CD163L1,CD5,FCGR2B,FOLR2,HSP90AA1,HSPH1,ITGB2,JCHAIN,LGALS3BP,MASP1,MRC1,PPT1,SELE,SERPINE1,SFRP4,SYK
GO:0002764	immune response-regulating signaling pathway	biological_process	28/414	511/19098	2.5277	7.50568e-06	0.000334783	28	ARPC5,C3AR1,C5AR1,CALM1,CD209,CD4,CLEC10A,CR1,CTSL,CTSS,FCGR2B,GRAP2,HSP90AA1,HSPA1B,IGLL5,ITGAM,ITGB2,ITK,MS4A2,NR4A3,PDE4B,PIK3AP1,PIK3R2,PRKCB,SYK,TLR6,TLR7,TLR8
GO:0002283	neutrophil activation involved in immune response	biological_process	27/414	483/19098	2.57872	7.62407e-06	0.000337869	27	ADA2,ARPC5,C3,C3AR1,C5AR1,CD53,CR1,CREG1,CTSS,CYBB,DOCK2,GRN,HSP90AA1,HSPA1B,HSPA6,ITGAM,ITGB2,MAN2B1,PNP,RAB37,SERPINB1,SIRPA,SLC2A5,SLPI,SYK,TRPM2,VNN1
GO:0008236	serine-type peptidase activity	molecular_function	17/414	223/19098	3.51667	7.90404e-06	0.000348031	17	C1QA,C1QB,C1QC,C1S,C2,C3,C4A,C4B,CFB,CMA1,CPVL,CTSL,CTSS,MASP1,MMP19,PRSS42,TPSB2
GO:0023052	signaling	biological_process	181/414	6410/19098	1.30259	8.89028e-06	0.000388964	181	ABCA1,ACKR4,ACTN3,ACVR1C,ADA2,ADAMTS18,ADGRV1,ADIPOQ,ADM,ADORA2A,AGTRAP,AKR1C2,AKR1C3,ARC,ARHGAP20,ARHGAP36,ARNTL,ARPC5,ASB14,ASB18,AVPR1A,BLNK,BTC,C1QA,C3,C3AR1,C5AR1,CALM1,CCL2,CCL5,CD209,CD4,CD5,CD53,CD82,CDS1,CEBPA,CHL1,CHRNA1,CISH,CITED2,CLDN5,CLEC10A,CR1,CSF1R,CSF3,CTSL,CTSS,CXCL14,CXCL3,CXCL9,CYBB,DDX11,DLK1,DOCK2,DSC2,DTX1,DUSP2,E2F2,E2F8,EFEMP1,EVI2A,EXTL1,F13A1,F2R,F2RL3,FBN1,FCGR2B,FGF…
GO:0051239	regulation of multicellular organismal process	biological_process	94/414	2821/19098	1.53714	9.28878e-06	0.000403827	94	ABCA1,ACP5,ACTN3,ACVR1C,ADAMTS18,ADAMTS9,ADIPOQ,ADM,ADORA2A,AQP1,ARC,ARNTL,AVPR1A,C1QC,C3,C3AR1,C5AR1,C5orf30,C6,CADM1,CALM1,CD4,CEBPA,CHODL,CITED2,CLDN5,CMA1,CR1,CSF1R,CSF3,CSRP3,CTSL,CYBB,DSC2,DTX1,E2F2,EFEMP1,F2R,FBN1,FCGR2B,FGF9,GPAM,HDAC4,HIST1H3B,HIST1H3C,HIST1H3F,HIST1H3I,HPGDS,HSPA1B,IL12RB2,IL18,IL1RL1,IL6,IL7R,IRX3,ITGA2B,ITGB2,KCNJ5,LEP,LMCD1,LMO1,MAP2,MMD,MYL3,NOS1,NR4A3,OPRD1,PDE4B,P…
GO:0032103	positive regulation of response to external stimulus	biological_process	19/414	275/19098	3.18719	9.6898e-06	0.000418612	19	C3,C3AR1,C5AR1,CCL5,CXCL14,CXCL3,CXCL9,IL18,IL1RL1,IL6,PDGFD,PLA2G2A,RARRES2,SERPINE1,TGM2,THBS1,THBS4,TLR6,TLR7
GO:0065007	biological regulation	biological_process	299/414	11886/19098	1.16044	9.76527e-06	0.000419235	299	ABCA1,ABCB5,ABCG1,AC067968.1,ACKR4,ACP5,ACTN3,ACVR1C,ADA2,ADAMTS18,ADAMTS8,ADAMTS9,ADGRV1,ADIPOQ,ADM,ADORA2A,AGTRAP,AKR1C1,AKR1C2,AKR1C3,ALB,AOAH,AQP1,AQP4,ARC,ARHGAP20,ARHGAP36,ARNTL,ARPC5,ASB14,ASB18,AVPR1A,BLNK,BTC,C1QA,C1QB,C1QC,C1S,C2,C3,C3AR1,C4A,C4B,C5AR1,C5orf30,C6,CADM1,CALM1,CCDC80,CCL2,CCL5,CD209,CD248,CD4,CD5,CD53,CD82,CDS1,CEBPA,CFB,CHL1,CHMP1B,CHODL,CHRNA1,CIDEC,CIPC,CISH,CITED2,CLD…
GO:0018636	phenanthrene 9,10-monooxygenase activity	molecular_function	3/414	3/19098	46.1304	1.01147e-05	0.000428875	3	AKR1C1,AKR1C2,AKR1C3
GO:0047086	ketosteroid monooxygenase activity	molecular_function	3/414	3/19098	46.1304	1.01147e-05	0.000428875	3	AKR1C1,AKR1C2,AKR1C3
GO:0043277	apoptotic cell clearance	biological_process	7/414	36/19098	8.96981	1.03685e-05	0.000436939	7	C2,C3,C4A,C4B,CCL2,TGM2,THBS1
GO:0042592	homeostatic process	biological_process	63/414	1672/19098	1.73817	1.04585e-05	0.000438046	63	ABCA1,ABCG1,ACP5,ADGRV1,ADIPOQ,ADM,ADORA2A,AKR1C1,ALB,AQP1,AQP4,AVPR1A,C3AR1,C5AR1,CALM1,CCL2,CCL5,CD4,CEBPA,CHRNA1,CITED2,CMA1,COL11A2,CP,CSF1R,CSRP3,CXCL9,CYBB,DGAT2,DHRS7C,EPB42,F2R,F2RL3,GOT1,GPAM,GPR174,HSP90AA1,HSPA1B,IL18,IL31RA,IL6,IL7R,JCHAIN,KLF1,LEP,LMO1,NOS1,NR4A3,PCK1,PDE4B,PIK3R2,PPT1,PRKAR1A,PRKAR2B,PRKCB,SFRP4,SLC39A14,SLC4A1,STEAP3,SYK,TGM2,TRPM2,TXNRD1
GO:0042116	macrophage activation	biological_process	9/414	65/19098	6.38729	1.05879e-05	0.000440778	9	FCGR2B,IL1RL1,IL31RA,ITGAM,SYK,THBS1,TLR6,TLR7,TLR8
GO:1901564	organonitrogen compound metabolic process	biological_process	190/414	6826/19098	1.28403	1.11631e-05	0.00046126	190	ABCA1,ABCG1,AC004556.1,ACP5,ACTN3,ACVR1C,ADA2,ADAM28,ADAMTS15,ADAMTS18,ADAMTS4,ADAMTS8,ADAMTS9,ADIPOQ,ADM,ADORA2A,ADSSL1,ALB,ALDH3A2,ALPL,AQP1,ARNTL,ASB12,ASB14,ASB18,ATP5F1D,BCAT1,BTC,C1QA,C1QB,C1QC,C1S,C2,C3,C3AR1,C4A,C4B,C5AR1,C6,CALM1,CCL2,CCL5,CD4,CDS1,CEBPA,CFB,CISH,CKMT2,CLEC3B,CMA1,COL11A1,CP,CPVL,CPXM1,CR1,CSF1R,CSF3,CST7,CTSL,CTSS,CXCL9,CYBB,DCUN1D4,DGAT2,DTX1,DUSP2,EFEMP1,EPB42,EXTL1,F…
GO:0050730	regulation of peptidyl-tyrosine phosphorylation	biological_process	17/414	229/19098	3.42453	1.12142e-05	0.00046126	17	ADIPOQ,CCL5,CD4,CSF1R,CSF3,GPRC5A,HSPH1,IL18,IL31RA,IL6,ITGB2,LEP,PDGFD,SFRP1,SYK,TDGF1,THBS4
GO:1901701	cellular response to oxygen-containing compound	biological_process	44/414	1024/19098	1.98217	1.2163e-05	0.000497308	44	ABCA1,ADIPOQ,AGTRAP,AKR1C1,AKR1C2,AKR1C3,AQP1,AVPR1A,CCL2,CCL5,CISH,CMA1,CSF3,CYBB,DDX11,DGAT2,FBN1,FCGR2B,FOLR2,GOT1,GPR37,HSPH1,IL18,IL6,KLF1,LEP,MRC1,NQO1,NR4A3,PCK1,PDE4B,PDGFD,PIK3R2,PRKAR1A,PRKAR2B,PRKCB,PTGFR,RARRES2,SERPINE1,SFRP1,SLC2A5,TLR6,TRPM2,TUSC5
GO:0042127	regulation of cell proliferation	biological_process	60/414	1575/19098	1.75735	1.26033e-05	0.000512262	60	ACVR1C,ADAMTS8,ADIPOQ,ADM,ADORA2A,AKR1C2,AKR1C3,AQP1,AVPR1A,BTC,C5AR1,CCL5,CD209,CD248,CD4,CEBPA,CITED2,CSF1R,CSF3,CXCL3,CXCL9,F2R,FABP7,FCGR2B,FGF9,FOLR2,FOSL1,GPAM,GRAP2,HDAC4,HLA-DMB,HPGDS,HSPA1B,IL12RB2,IL18,IL31RA,IL6,IL7R,ITK,KLB,LEP,LMO1,MDM4,NR4A3,PDGFD,PNP,PRKAR1A,PTGFR,PTGS1,S100B,SFRP1,SFRP4,SPHK1,SYK,TDGF1,TGM2,THBS1,THBS4,TNMD,VIPR2
GO:0008284	positive regulation of cell proliferation	biological_process	39/414	866/19098	2.07747	1.37334e-05	0.000554911	39	ADM,AKR1C2,AKR1C3,AQP1,AVPR1A,BTC,C5AR1,CCL5,CD209,CD248,CD4,CSF1R,CSF3,F2R,FGF9,FOLR2,FOSL1,GPAM,HDAC4,HLA-DMB,IL12RB2,IL18,IL31RA,IL6,IL7R,KLB,LEP,NR4A3,PDGFD,PNP,PTGFR,S100B,SFRP1,SPHK1,SYK,TDGF1,TGM2,THBS1,THBS4
GO:0002366	leukocyte activation involved in immune response	biological_process	33/414	678/19098	2.24529	1.38924e-05	0.000558054	33	ADA2,ARPC5,C3,C3AR1,C5AR1,CD53,CR1,CREG1,CTSS,CYBB,DOCK2,FCGR2B,GRN,HLA-DMB,HSP90AA1,HSPA1B,HSPA6,IL18,IL6,ITGAM,ITGB2,MAN2B1,NR4A3,PNP,RAB37,RASGRP1,SERPINB1,SIRPA,SLC2A5,SLPI,SYK,TRPM2,VNN1
GO:0051707	response to other organism	biological_process	38/414	837/19098	2.09433	1.48715e-05	0.000593909	38	ABCA1,ACP5,ADM,ALPL,C4B,C5AR1,CCL2,CCL5,CD4,CSF3,CXCL3,CXCL9,F2R,FCGR2B,FOSL1,GPAM,IGLL5,IL10RA,IL12RB2,IL18,IL31RA,IL6,JCHAIN,LOXL1,MAP3K14,MRC1,PCK1,PDE4B,PLA2G2A,PTGFR,RARRES2,SELE,SERPINE1,SLPI,SYK,TLR6,TLR7,TLR8
GO:0071675	regulation of mononuclear cell migration	biological_process	7/414	38/19098	8.49771	1.51006e-05	0.000599571	7	C3AR1,C5AR1,CCL5,PDGFD,RARRES2,SERPINE1,THBS1
GO:0050789	regulation of biological process	biological_process	285/414	11249/19098	1.16874	1.55139e-05	0.000612001	285	ABCA1,ABCG1,AC067968.1,ACKR4,ACP5,ACTN3,ACVR1C,ADA2,ADAMTS18,ADAMTS8,ADAMTS9,ADGRV1,ADIPOQ,ADM,ADORA2A,AGTRAP,AKR1C2,AKR1C3,ALB,AOAH,AQP1,ARC,ARHGAP20,ARHGAP36,ARNTL,ARPC5,ASB14,ASB18,AVPR1A,BLNK,BTC,C1QA,C1QB,C1QC,C1S,C2,C3,C3AR1,C4A,C4B,C5AR1,C5orf30,C6,CADM1,CALM1,CCDC80,CCL2,CCL5,CD209,CD248,CD4,CD5,CD53,CD82,CDS1,CEBPA,CFB,CHL1,CHMP1B,CHODL,CHRNA1,CIDEC,CIPC,CISH,CITED2,CLDN5,CLEC10A,CLEC3B,…
GO:0002263	cell activation involved in immune response	biological_process	33/414	682/19098	2.23212	1.56522e-05	0.000612001	33	ADA2,ARPC5,C3,C3AR1,C5AR1,CD53,CR1,CREG1,CTSS,CYBB,DOCK2,FCGR2B,GRN,HLA-DMB,HSP90AA1,HSPA1B,HSPA6,IL18,IL6,ITGAM,ITGB2,MAN2B1,NR4A3,PNP,RAB37,RASGRP1,SERPINB1,SIRPA,SLC2A5,SLPI,SYK,TRPM2,VNN1
GO:0043207	response to external biotic stimulus	biological_process	38/414	839/19098	2.08934	1.56809e-05	0.000612001	38	ABCA1,ACP5,ADM,ALPL,C4B,C5AR1,CCL2,CCL5,CD4,CSF3,CXCL3,CXCL9,F2R,FCGR2B,FOSL1,GPAM,IGLL5,IL10RA,IL12RB2,IL18,IL31RA,IL6,JCHAIN,LOXL1,MAP3K14,MRC1,PCK1,PDE4B,PLA2G2A,PTGFR,RARRES2,SELE,SERPINE1,SLPI,SYK,TLR6,TLR7,TLR8
GO:0006810	transport	biological_process	143/414	4845/19098	1.36154	1.6672e-05	0.000647007	143	ABCA1,ABCB5,ABCG1,ACKR4,ACVR1C,ADA2,ADAMTS8,ADAMTS9,ADIPOQ,ADM,ADORA2A,AKR1C1,AKR1C3,ALB,AQP1,AQP4,ARC,ARNTL,ARPC5,ATP5F1D,AVPR1A,C2,C3,C3AR1,C4A,C4B,C5AR1,C5orf30,CA14,CADM1,CALM1,CCL2,CCL5,CD163L1,CD209,CD4,CD5,CD53,CES1,CHMP1B,CHRNA1,CLEC10A,CLEC3B,CLIC6,CP,CR1,CREG1,CSF1R,CTSS,CXCL9,CYBB,DHRS7C,DOCK2,EMB,F13A1,F2R,F2RL3,FCGR2B,FGF9,FOLR2,FRAS1,GABRE,GALNT8,GPAM,GRN,GRPEL2,HBD,HBM,HSP90AA1,HSP…
GO:0060326	cell chemotaxis	biological_process	18/414	261/19098	3.18141	1.69884e-05	0.000655581	18	C3AR1,C5AR1,CCL2,CCL5,CH25H,CXCL14,CXCL3,CXCL9,IL6,ITGB2,PDE4B,PDGFD,RARRES2,SERPINE1,SYK,THBS1,THBS4,TRPM2
GO:0050840	extracellular matrix binding	molecular_function	8/414	53/19098	6.96308	1.71983e-05	0.000659974	8	ADAMTS15,CD248,COL11A1,CTSS,ELN,ITGA2B,SMOC1,THBS1
GO:0071621	granulocyte chemotaxis	biological_process	11/414	106/19098	4.78712	1.90903e-05	0.000728507	11	C3AR1,C5AR1,CCL2,CCL5,CXCL3,ITGB2,PDE4B,RARRES2,SYK,THBS1,THBS4
GO:0032787	monocarboxylic acid metabolic process	biological_process	30/414	598/19098	2.31424	1.95599e-05	0.000738955	30	ACSS1,ACTN3,ADIPOQ,AKR1C1,AKR1C2,AKR1C3,ALDH3A2,AVPR1A,C3,CES1,CH25H,DGAT2,GLYAT,GPAM,HDAC4,HPGDS,LEP,LIPE,MPC1,NR4A3,OSBPL3,OSBPL6,PCK1,PDPR,PGAM2,PRKAG3,PRKAR2B,PTGS1,TECRL,VNN1
GO:0050764	regulation of phagocytosis	biological_process	9/414	70/19098	5.93106	1.95792e-05	0.000738955	9	ADIPOQ,C2,C3,C4A,C4B,CCL2,DOCK2,FCGR2B,SYK
GO:0019221	cytokine-mediated signaling pathway	biological_process	36/414	784/19098	2.11823	1.97879e-05	0.000742751	36	ACKR4,ADIPOQ,CCL2,CCL5,CD4,CEBPA,CISH,CSF1R,CSF3,CXCL3,CXCL9,F13A1,HIST1H3B,HIST1H3C,HIST1H3F,HIST1H3I,HSP90AA1,HSPA1B,IL10RA,IL12RB2,IL18,IL1RL1,IL31RA,IL6,IL7R,ITGAM,ITGB2,LEP,MAP3K14,NCAM1,OPRD1,RFFL,SDC1,SERPINB2,SPHK1,SYK
GO:0004175	endopeptidase activity	molecular_function	24/414	424/19098	2.61116	1.99929e-05	0.000746366	24	ADAM28,ADAMTS15,ADAMTS18,ADAMTS4,ADAMTS8,ADAMTS9,C1QA,C1QB,C1QC,C1S,C2,C3,C4A,C4B,CFB,CMA1,CTSL,CTSS,MASP1,MMP19,PRSS42,SENP3-EIF4A1,SFRP1,TPSB2
GO:0002757	immune response-activating signal transduction	biological_process	26/414	481/19098	2.49354	2.01261e-05	0.000747278	26	ARPC5,C3AR1,C5AR1,CD209,CD4,CLEC10A,CR1,CTSL,CTSS,FCGR2B,GRAP2,HSP90AA1,HSPA1B,IGLL5,ITGAM,ITGB2,ITK,NR4A3,PDE4B,PIK3AP1,PIK3R2,PRKCB,SYK,TLR6,TLR7,TLR8
GO:0045807	positive regulation of endocytosis	biological_process	12/414	127/19098	4.35878	2.09074e-05	0.000772112	12	C2,C3,C4A,C4B,CCL2,DOCK2,FCGR2B,PPT1,SELE,SERPINE1,SFRP4,SYK
GO:0010951	negative regulation of endopeptidase activity	biological_process	17/414	241/19098	3.25401	2.17563e-05	0.000795636	17	ADORA2A,AQP1,C3,C4A,C4B,CR1,CST7,NAIP,RENBP,RFFL,SERPINB1,SERPINB2,SERPINE1,SLPI,TFPI2,THBS1,WFIKKN1
GO:0051234	establishment of localization	biological_process	145/414	4953/19098	1.35048	2.1776e-05	0.000795636	145	ABCA1,ABCB5,ABCG1,ACKR4,ACVR1C,ADA2,ADAMTS8,ADAMTS9,ADIPOQ,ADM,ADORA2A,AKR1C1,AKR1C3,ALB,AQP1,AQP4,ARC,ARNTL,ARPC5,ATP5F1D,AVPR1A,C2,C3,C3AR1,C4A,C4B,C5AR1,C5orf30,CA14,CADM1,CALM1,CCL2,CCL5,CD163L1,CD209,CD4,CD5,CD53,CES1,CHMP1B,CHRNA1,CLEC10A,CLEC3B,CLIC6,CP,CR1,CREG1,CSF1R,CTSS,CXCL9,CYBB,DHRS7C,DOCK2,EMB,F13A1,F2R,F2RL3,FCGR2B,FGF9,FOLR2,FRAS1,GABRE,GALNT8,GPAM,GRN,GRPEL2,HBD,HBM,HIST1H1B,HSP…
GO:0009607	response to biotic stimulus	biological_process	39/414	885/19098	2.03287	2.23654e-05	0.000812845	39	ABCA1,ACP5,ADM,ALPL,C4B,C5AR1,CCL2,CCL5,CD4,CSF3,CXCL3,CXCL9,F2R,FCGR2B,FOSL1,GPAM,IGLL5,IL10RA,IL12RB2,IL18,IL31RA,IL6,JCHAIN,LOXL1,MAP3K14,MRC1,PCK1,PDE4B,PLA2G2A,PTGFR,RARRES2,SELE,SERPINE1,SLPI,SYK,TLR6,TLR7,TLR8,TUSC5
GO:0002685	regulation of leukocyte migration	biological_process	14/414	171/19098	3.77676	2.25064e-05	0.00081318	14	C3AR1,C5AR1,CCL2,CCL5,CXCL14,CXCL3,CXCL9,IL6,ITGA2B,PDGFD,RARRES2,SERPINE1,THBS1,THBS4
GO:0001568	blood vessel development	biological_process	31/414	633/19098	2.25915	2.26113e-05	0.00081318	31	ADAMTS9,ADM,AQP1,C3,C3AR1,C5AR1,C6,CCL2,CITED2,CMA1,CYBB,E2F2,E2F8,FGF9,FOSL1,IL18,IL6,ITGB2,LEP,LOXL1,MMP19,PDGFD,PRKCB,SERPINE1,SFRP1,SPHK1,SYK,TDGF1,THBS1,THBS4,TNMD
GO:0050921	positive regulation of chemotaxis	biological_process	12/414	129/19098	4.2912	2.4467e-05	0.000875332	12	C3AR1,C5AR1,CCL5,CXCL14,CXCL3,CXCL9,IL6,PDGFD,RARRES2,SERPINE1,THBS1,THBS4
GO:0042102	positive regulation of T cell proliferation	biological_process	10/414	90/19098	5.1256	2.50887e-05	0.000890764	10	CCL5,CD209,CD4,GPAM,HLA-DMB,IL18,IL6,LEP,PNP,SYK
GO:1902563	regulation of neutrophil activation	biological_process	4/414	9/19098	20.5024	2.51577e-05	0.000890764	4	FCGR2B,ITGAM,ITGB2,SYK
GO:0006911	phagocytosis, engulfment	biological_process	7/414	41/19098	7.87593	2.54355e-05	0.000893833	7	ABCA1,C3,FCGR2B,IGLL5,ITGAM,ITGB2,THBS1
GO:0010941	regulation of cell death	biological_process	60/414	1613/19098	1.71595	2.559e-05	0.000893833	60	ACTN3,ACVR1C,ADIPOQ,ADM,ADORA2A,AKR1C3,ALB,AQP1,BTC,C5AR1,CCL2,CCL5,CD248,CHL1,CIDEC,CITED2,CSF1R,CSF3,ERCC5,F2R,FCGR2B,FOSL1,GPAM,GPR37,HDAC4,HHIP,HSPA1B,HSPH1,IER3,IL31RA,IL6,ITGAM,LEP,MAP3K14,MDM4,MPV17L,NAIP,NQO1,NR4A3,PPT1,PTGFR,RFFL,S100B,SERPINB2,SERPINE1,SFRP1,SFRP4,SLC25A4,SPHK1,STEAP3,TDGF1,TGM2,THBS1,TLR6,TNFAIP8L2,TOP2A,TRPM2,VNN1,WISP1,ZNF385A
GO:0019722	calcium-mediated signaling	biological_process	14/414	173/19098	3.7331	2.56348e-05	0.000893833	14	ACTN3,AVPR1A,CALM1,CD4,HDAC4,LMCD1,NOS1,PLEK,PTGFR,RCAN2,SELE,SPHK1,SYK,TRPM2
GO:0097529	myeloid leukocyte migration	biological_process	14/414	174/19098	3.71164	2.73376e-05	0.000948395	14	C3AR1,C5AR1,CCL2,CCL5,CXCL3,IL6,ITGB2,PDE4B,PDGFD,RARRES2,SERPINE1,SYK,THBS1,THBS4
GO:0043269	regulation of ion transport	biological_process	30/414	609/19098	2.27244	2.75242e-05	0.00095007	30	ADORA2A,ARC,AVPR1A,CALM1,CCL2,CCL5,CD4,CLIC6,CTSS,CXCL9,CYBB,DHRS7C,F2R,F2RL3,GABRE,GALNT8,KCNA6,KCNA7,KCNJ5,KCNS3,LEP,NOS1,OPRD1,PDE4B,SCN9A,SFRP4,SLC38A3,SYK,THBS1,TRPV3
GO:1904018	positive regulation of vasculature development	biological_process	14/414	175/19098	3.69043	2.91391e-05	0.00100078	14	ADM,AQP1,C3,C3AR1,C5AR1,C6,CMA1,CYBB,ITGB2,PDGFD,PRKCB,SERPINE1,SPHK1,THBS1
GO:0009725	response to hormone	biological_process	41/414	963/19098	1.96402	3.02413e-05	0.00103347	41	ABCG1,ACVR1C,ADIPOQ,ADM,AGTRAP,AKR1C1,AKR1C2,AKR1C3,ALPL,AQP1,ARNTL,AVPR1A,CD4,CISH,CTSL,CTSS,CYBB,FBN1,FOSL1,GOT1,GPAM,HDAC4,IL6,LEP,MMP19,NQO1,NR4A3,PCK1,PIK3R2,PRKAR1A,PRKAR2B,PRKCB,PTGFR,RARRES2,RXRG,S100B,SDC1,SFRP1,SFRP4,THBS1,TUSC5
GO:0048514	blood vessel morphogenesis	biological_process	28/414	553/19098	2.33572	3.15093e-05	0.00107147	28	ADAMTS9,ADM,AQP1,C3,C3AR1,C5AR1,C6,CCL2,CITED2,CMA1,CYBB,E2F2,E2F8,FGF9,IL18,IL6,ITGB2,LEP,MMP19,PRKCB,SERPINE1,SFRP1,SPHK1,SYK,TDGF1,THBS1,THBS4,TNMD
GO:0051179	localization	biological_process	173/414	6187/19098	1.28989	3.18996e-05	0.0010794	173	ABCA1,ABCB5,ABCG1,ACKR4,ACVR1C,ADA2,ADAMTS8,ADAMTS9,ADIPOQ,ADM,ADORA2A,AKR1C1,AKR1C3,ALB,AQP1,AQP4,ARC,ARNTL,ARPC5,ATP5F1D,AVPR1A,BTC,C2,C3,C3AR1,C4A,C4B,C5AR1,C5orf30,CA14,CADM1,CALM1,CCL2,CCL5,CD163L1,CD209,CD248,CD4,CD5,CD53,CES1,CH25H,CHL1,CHMP1B,CHRNA1,CITED2,CLEC10A,CLEC3B,CLIC6,CP,CR1,CREG1,CSF1R,CSRP3,CTSS,CXCL14,CXCL3,CXCL9,CYBB,DGAT2,DHRS7C,DOCK2,DSC2,EMB,F13A1,F2R,F2RL3,FBN1,FCGR2B,FGF…
GO:0010466	negative regulation of peptidase activity	biological_process	17/414	250/19098	3.13687	3.47133e-05	0.00116885	17	ADORA2A,AQP1,C3,C4A,C4B,CR1,CST7,NAIP,RENBP,RFFL,SERPINB1,SERPINB2,SERPINE1,SLPI,TFPI2,THBS1,WFIKKN1
GO:0001817	regulation of cytokine production	biological_process	30/414	617/19098	2.24297	3.50584e-05	0.00117147	30	ACP5,ADIPOQ,C3,C3AR1,C5AR1,C5orf30,CADM1,CD4,CSF1R,CYBB,F2R,FCGR2B,GPAM,HSPA1B,IL12RB2,IL18,IL1RL1,IL6,LEP,NR4A3,PDE4B,RASGRP1,SERPINE1,SPHK1,SYK,THBS1,TIGIT,TLR6,TLR7,TLR8
GO:0007166	cell surface receptor signaling pathway	biological_process	92/414	2838/19098	1.49542	3.51321e-05	0.00117147	92	ABCA1,ACKR4,ACVR1C,ADAMTS18,ADGRV1,ADIPOQ,ADORA2A,ARC,ARNTL,ARPC5,BLNK,BTC,C3AR1,C5AR1,CALM1,CCL2,CCL5,CD209,CD4,CD53,CD82,CEBPA,CHRNA1,CISH,CITED2,CLDN5,CLEC10A,CR1,CSF1R,CSF3,CXCL3,CXCL9,CYBB,DLK1,DTX1,EFEMP1,F13A1,FBN1,FCGR2B,FGF9,GOT1,GPRC5A,GRAP2,HHIP,HIST1H3B,HIST1H3C,HIST1H3F,HIST1H3I,HSP90AA1,HSPA1B,IGLL5,IL10RA,IL12RB2,IL18,IL1RL1,IL31RA,IL6,IL7R,ITGA2B,ITGAM,ITGB2,ITGB6,ITK,KLB,LEP,LILR…
GO:0050793	regulation of developmental process	biological_process	81/414	2414/19098	1.54787	3.58245e-05	0.00118879	81	ABCA1,ABCG1,ACTN3,ACVR1C,ADAMTS9,ADGRV1,ADIPOQ,ADM,AQP1,ARC,ARNTL,BTC,C1QC,C3,C3AR1,C5AR1,C6,CCL2,CD4,CD53,CEBPA,CHODL,CITED2,CLDN5,CMA1,CR1,CSF1R,CSF3,CTSL,CXCL14,CXCL9,CYBB,DTX1,E2F2,EFEMP1,EPB42,FBN1,FCGR2B,FGF9,GPAM,HDAC4,HIST1H3B,HIST1H3C,HIST1H3F,HIST1H3I,HSPA1B,IL18,IL6,IL7R,IRX3,ITGA2B,ITGB2,LEP,LMO1,MAP2,MMD,NMRK2,NOS1,NR4A3,PALM,PDGFD,PHOSPHO1,PLA2G2A,PNP,PRKCB,RARRES2,RASGRP1,S100B,SER…
GO:0060548	negative regulation of cell death	biological_process	40/414	939/19098	1.96509	3.75068e-05	0.00123862	40	ADORA2A,ALB,AQP1,BTC,C5AR1,CCL2,CCL5,CHL1,CITED2,CSF1R,CSF3,ERCC5,F2R,GPAM,GPR37,HHIP,HSPA1B,HSPH1,IER3,IL31RA,IL6,LEP,MDM4,MPV17L,NAIP,NQO1,NR4A3,PPT1,PTGFR,RFFL,SERPINB2,SERPINE1,SFRP1,SLC25A4,SPHK1,TDGF1,THBS1,VNN1,WISP1,ZNF385A
GO:0038111	interleukin-7-mediated signaling pathway	biological_process	6/414	30/19098	9.22609	3.82235e-05	0.00125625	6	CISH,HIST1H3B,HIST1H3C,HIST1H3F,HIST1H3I,IL7R
GO:0001851	complement component C3b binding	molecular_function	3/414	4/19098	34.5978	3.98056e-05	0.00127769	3	CR1,ITGAM,ITGB2
GO:0006114	glycerol biosynthetic process	biological_process	3/414	4/19098	34.5978	3.98056e-05	0.00127769	3	GOT1,LEP,PCK1
GO:0009753	response to jasmonic acid	biological_process	3/414	4/19098	34.5978	3.98056e-05	0.00127769	3	AKR1C1,AKR1C2,AKR1C3
GO:0047115	trans-1,2-dihydrobenzene-1,2-diol dehydrogenase activity	molecular_function	3/414	4/19098	34.5978	3.98056e-05	0.00127769	3	AKR1C1,AKR1C2,AKR1C3
GO:0071395	cellular response to jasmonic acid stimulus	biological_process	3/414	4/19098	34.5978	3.98056e-05	0.00127769	3	AKR1C1,AKR1C2,AKR1C3
GO:0051186	cofactor metabolic process	biological_process	28/414	561/19098	2.30241	4.05867e-05	0.0012967	28	ACSS1,ACTN3,AKR1C1,AKR1C2,AKR1C3,CALM1,COQ10A,CYBB,DGAT2,FDXR,FOLR2,GLYAT,GOT1,GPAM,GPT2,GPX3,HDAC4,HSP90AA1,MPC1,MPV17L,NMRK2,PDPR,PGAM2,PNP,PPT1,PXDNL,RPE,VNN1
GO:0045766	positive regulation of angiogenesis	biological_process	13/414	158/19098	3.79554	4.17374e-05	0.00132729	13	ADM,AQP1,C3,C3AR1,C5AR1,C6,CMA1,CYBB,ITGB2,PRKCB,SERPINE1,SPHK1,THBS1
GO:0048661	positive regulation of smooth muscle cell proliferation	biological_process	9/414	77/19098	5.39187	4.24998e-05	0.0013453	9	CCL5,FGF9,HDAC4,IL18,IL6,NR4A3,PDGFD,TGM2,THBS1
GO:0005886	plasma membrane	cellular_component	149/414	5187/19098	1.32513	4.35694e-05	0.00137284	149	ABCA1,ABCB5,ABCG1,ACKR4,ACVR1C,ADAM28,ADGRV1,ADORA2A,AGTRAP,ALPL,AQP1,AQP4,ARC,AVPR1A,BLNK,BTC,C3,C3AR1,C4A,C4B,C5AR1,C6,CA14,CADM1,CALM1,CD163L1,CD209,CD4,CD5,CD53,CD82,CFB,CHL1,CHRNA1,CISH,CLDN5,CLEC10A,CLIC6,CR1,CSF1R,CXCL9,CYBB,DSC2,EMB,EPB42,F2R,F2RL3,FAT3,FCGR2B,FOLR2,FOSL1,FRAS1,GABRE,GALNT8,GPAM,GPR135,GPR174,GPR37,GPRC5A,GRAP2,HHIP,HLA-DMB,HLA-DQB1,HSP90AA1,IGLL5,IL10RA,IL12RB2,IL1RL1,IL…
GO:0030198	extracellular matrix organization	biological_process	20/414	334/19098	2.7623	4.49458e-05	0.00140403	20	ADAMTS4,ADAMTS9,CCDC80,CMA1,COL11A1,COL11A2,CTSL,CTSS,EGFL6,ELN,FBN1,ITGA2B,ITGAM,ITGB2,ITGB6,LOXL1,MMP19,SERPINE1,THBS1,THBS4
GO:0031349	positive regulation of defense response	biological_process	24/414	446/19098	2.48236	4.49681e-05	0.00140403	24	C3,CADM1,CCL5,CD209,CLEC10A,CTSL,CTSS,HSPA1B,IL18,IL1RL1,IL6,ITGAM,ITGB2,PIK3AP1,PLA2G2A,RAET1E,RASGRP1,SERPINE1,SH2D1A,SYK,TGM2,TLR6,TLR7,TLR8
GO:0001944	vasculature development	biological_process	31/414	657/19098	2.17663	4.57094e-05	0.00142071	31	ADAMTS9,ADM,AQP1,C3,C3AR1,C5AR1,C6,CCL2,CITED2,CMA1,CYBB,E2F2,E2F8,FGF9,FOSL1,IL18,IL6,ITGB2,LEP,LOXL1,MMP19,PDGFD,PRKCB,SERPINE1,SFRP1,SPHK1,SYK,TDGF1,THBS1,THBS4,TNMD
GO:0098760	response to interleukin-7	biological_process	6/414	31/19098	8.92847	4.65365e-05	0.00143345	6	CISH,HIST1H3B,HIST1H3C,HIST1H3F,HIST1H3I,IL7R
GO:0098761	cellular response to interleukin-7	biological_process	6/414	31/19098	8.92847	4.65365e-05	0.00143345	6	CISH,HIST1H3B,HIST1H3C,HIST1H3F,HIST1H3I,IL7R
GO:0044420	extracellular matrix component	cellular_component	11/414	117/19098	4.33705	4.81721e-05	0.0014772	11	CCDC80,COL11A1,COL11A2,EGFL6,ELN,FBN1,FGF9,FRAS1,LOXL1,SMOC1,THBS4
GO:0030162	regulation of proteolysis	biological_process	33/414	722/19098	2.10845	4.8419e-05	0.00147818	33	ACVR1C,ADORA2A,AQP1,C1QA,C1QB,C1QC,C1S,C2,C3,C3AR1,C4A,C4B,C5AR1,C6,CEBPA,CFB,CLEC3B,CR1,CST7,F2R,LONRF3,NAIP,PYHIN1,RENBP,RFFL,SERPINB1,SERPINB2,SERPINE1,SLPI,TFPI2,THBS1,WFIKKN1,ZFAND2A
GO:0060205	cytoplasmic vesicle lumen	cellular_component	20/414	336/19098	2.74586	4.88533e-05	0.00148484	20	ADA2,ALB,ARPC5,C3,CLEC3B,CREG1,DOCK2,F13A1,GRN,HSP90AA1,HSPA6,HSPH1,LGALS3BP,MAN2B1,PNP,RARRES2,SERPINB1,SERPINE1,SLPI,THBS1
GO:0048856	anatomical structure development	biological_process	159/414	5628/19098	1.30326	5.0303e-05	0.00152216	159	ABCB5,ACP5,ACTN3,ACVR1C,ADA2,ADAMTS18,ADAMTS4,ADAMTS9,ADGRV1,ADIPOQ,ADM,ADORA2A,AKR1C1,AKR1C2,AKR1C3,ALDH3A2,ALPL,AQP1,ARC,ARNTL,ARPC5,AVPR1A,BLNK,C1QB,C1QC,C3,C3AR1,C5AR1,C6,CADM1,CALM1,CCL2,CD248,CD4,CD53,CEBPA,CES1,CHL1,CHODL,CHRNA1,CITED2,CLDN5,CLEC3B,CMA1,COL11A1,COL11A2,CR1,CREG1,CSF1R,CSF3,CSRP3,CTSL,CXCL14,CXCL9,CYBB,DDX11,DGAT2,DOCK2,DSC2,DTX1,DUSP2,E2F2,E2F8,EFEMP1,EGFL6,ELN,EPB42,EXTL1…
GO:0031983	vesicle lumen	cellular_component	20/414	337/19098	2.73771	5.09183e-05	0.00153403	20	ADA2,ALB,ARPC5,C3,CLEC3B,CREG1,DOCK2,F13A1,GRN,HSP90AA1,HSPA6,HSPH1,LGALS3BP,MAN2B1,PNP,RARRES2,SERPINB1,SERPINE1,SLPI,THBS1
GO:0006979	response to oxidative stress	biological_process	23/414	421/19098	2.52019	5.13721e-05	0.00154094	23	ADIPOQ,AKR1C3,ANGPTL7,AQP1,ARNTL,CYBB,FOSL1,GPR37,GPX3,HSPA1B,HSPH1,IL6,NQO1,NR4A3,PDGFD,PTGS1,PXDNL,SDC1,SRXN1,TLR6,TRPM2,TXNRD1,VNN1
GO:0071674	mononuclear cell migration	biological_process	9/414	79/19098	5.25537	5.21932e-05	0.00155876	9	C3AR1,C5AR1,CCL2,CCL5,IL6,PDGFD,RARRES2,SERPINE1,THBS1
GO:0002703	regulation of leukocyte mediated immunity	biological_process	13/414	162/19098	3.70183	5.41275e-05	0.00160953	13	C3,CADM1,CR1,FCGR2B,IL6,IL7R,ITGAM,ITGB2,LEP,RAET1E,RASGRP1,SH2D1A,SYK
GO:0008283	cell proliferation	biological_process	69/414	1989/19098	1.6003	5.53484e-05	0.00163231	69	ACVR1C,ADAMTS8,ADIPOQ,ADM,ADORA2A,AKR1C2,AKR1C3,AQP1,AVPR1A,BCAT1,BTC,C5AR1,CCL5,CD209,CD248,CD4,CD5,CEBPA,CITED2,CREG1,CSF1R,CSF3,CXCL3,CXCL9,DOCK2,E2F8,ELN,F2R,FABP7,FCGR2B,FGF9,FOLR2,FOSL1,GPAM,GRAP2,HDAC4,HHIP,HLA-DMB,HPGDS,HSPA1B,IL12RB2,IL18,IL31RA,IL6,IL7R,ITK,KLB,LEP,LMO1,MDM4,NR4A3,PDGFD,PNP,PRKAR1A,PTGFR,PTGS1,S100B,SFRP1,SFRP4,SPHK1,SYK,TDGF1,TGM2,THBS1,THBS4,TMEM110-MUSTN1,TNMD,TXNRD1…
GO:0010758	regulation of macrophage chemotaxis	biological_process	5/414	20/19098	11.5326	5.53688e-05	0.00163231	5	C3AR1,C5AR1,CCL5,RARRES2,THBS1
GO:0030099	myeloid cell differentiation	biological_process	22/414	395/19098	2.56929	5.61694e-05	0.00164377	22	ADIPOQ,C1QC,CD4,CEBPA,CITED2,CSF1R,CSF3,EPB42,FBN1,HIST1H3B,HIST1H3C,HIST1H3F,HIST1H3I,HSPA1B,IL31RA,ITGA2B,KLF1,NR4A3,PRKCB,SFRP1,THBS1,ZNF385A
GO:0048246	macrophage chemotaxis	biological_process	6/414	32/19098	8.64946	5.6236e-05	0.00164377	6	C3AR1,C5AR1,CCL2,CCL5,RARRES2,THBS1
GO:0072358	cardiovascular system development	biological_process	31/414	665/19098	2.15044	5.72323e-05	0.0016658	31	ADAMTS9,ADM,AQP1,C3,C3AR1,C5AR1,C6,CCL2,CITED2,CMA1,CYBB,E2F2,E2F8,FGF9,FOSL1,IL18,IL6,ITGB2,LEP,LOXL1,MMP19,PDGFD,PRKCB,SERPINE1,SFRP1,SPHK1,SYK,TDGF1,THBS1,THBS4,TNMD
GO:0031410	cytoplasmic vesicle	cellular_component	75/414	2219/19098	1.55916	5.86858e-05	0.0017009	75	ABCA1,ABCG1,ACKR4,ADA2,AGTRAP,ALB,AOAH,ARC,ARPC5,AVPR1A,C3,C3AR1,C5AR1,CD4,CD53,CHMP1B,CLEC3B,CMA1,CR1,CREG1,CTSL,CTSS,CYBB,DOCK2,DSC2,F13A1,F2R,GPRC5A,GRAP2,GRN,HLA-DMB,HSP90AA1,HSPA1B,HSPA6,HSPH1,IL7R,ITGA2B,ITGAM,ITGB2,LGALS3BP,LOXL1,MAN2B1,MAP6D1,MARCH1,MMD,MRC1,NRBF2,PALM,PDE4B,PLA2G2A,PNP,PPT1,PRKCB,PTP4A3,RAB37,RAB40C,RARRES2,RFFL,SERPINB1,SERPINE1,SIRPA,SLC2A5,SLPI,STEAP3,STON2,SYK,THBS1,…
GO:0097530	granulocyte migration	biological_process	11/414	120/19098	4.22862	6.0816e-05	0.00175523	11	C3AR1,C5AR1,CCL2,CCL5,CXCL3,ITGB2,PDE4B,RARRES2,SYK,THBS1,THBS4
GO:0097708	intracellular vesicle	cellular_component	75/414	2222/19098	1.55706	6.13361e-05	0.00176283	75	ABCA1,ABCG1,ACKR4,ADA2,AGTRAP,ALB,AOAH,ARC,ARPC5,AVPR1A,C3,C3AR1,C5AR1,CD4,CD53,CHMP1B,CLEC3B,CMA1,CR1,CREG1,CTSL,CTSS,CYBB,DOCK2,DSC2,F13A1,F2R,GPRC5A,GRAP2,GRN,HLA-DMB,HSP90AA1,HSPA1B,HSPA6,HSPH1,IL7R,ITGA2B,ITGAM,ITGB2,LGALS3BP,LOXL1,MAN2B1,MAP6D1,MARCH1,MMD,MRC1,NRBF2,PALM,PDE4B,PLA2G2A,PNP,PPT1,PRKCB,PTP4A3,RAB37,RAB40C,RARRES2,RFFL,SERPINB1,SERPINE1,SIRPA,SLC2A5,SLPI,STEAP3,STON2,SYK,THBS1,…
GO:0043069	negative regulation of programmed cell death	biological_process	37/414	862/19098	1.98008	6.33477e-05	0.00180595	37	ADORA2A,ALB,AQP1,BTC,C5AR1,CCL2,CCL5,CHL1,CITED2,CSF1R,ERCC5,F2R,GPAM,HHIP,HSPA1B,HSPH1,IER3,IL31RA,IL6,LEP,MDM4,MPV17L,NAIP,NQO1,NR4A3,PPT1,PTGFR,RFFL,SERPINB2,SERPINE1,SFRP1,SLC25A4,SPHK1,TDGF1,THBS1,VNN1,ZNF385A
GO:0050766	positive regulation of phagocytosis	biological_process	7/414	47/19098	6.87049	6.36251e-05	0.00180595	7	C2,C3,C4A,C4B,CCL2,DOCK2,FCGR2B
GO:0071622	regulation of granulocyte chemotaxis	biological_process	7/414	47/19098	6.87049	6.36251e-05	0.00180595	7	C3AR1,C5AR1,CCL5,CXCL3,RARRES2,THBS1,THBS4
GO:0072593	reactive oxygen species metabolic process	biological_process	16/414	237/19098	3.11429	6.399e-05	0.00180884	16	ACP5,AKR1C3,CYBB,GPX3,HDAC4,HSP90AA1,ITGAM,ITGB2,LEP,MPV17L,NOS1,NQO1,PXDNL,SYK,THBS1,TLR6
GO:0048660	regulation of smooth muscle cell proliferation	biological_process	11/414	121/19098	4.19368	6.56189e-05	0.00184728	11	ADIPOQ,CCL5,FGF9,HDAC4,IL18,IL6,NR4A3,PDGFD,TGM2,THBS1,VIPR2
GO:0010243	response to organonitrogen compound	biological_process	39/414	930/19098	1.9345	6.59311e-05	0.00184849	39	ABCA1,ACVR1C,ADIPOQ,ADM,ADORA2A,AGTRAP,AQP1,AVPR1A,C5AR1,CISH,CYBB,DDX11,FBN1,FCGR2B,FOLR2,FOSL1,GOT1,IL6,ITGB2,KLF1,LEP,MMP19,NAIP,NR4A3,PCK1,PDE4B,PDGFD,PIK3R2,PPP1R1B,PRKAR1A,PRKAR2B,PRKCB,RARRES2,SDC1,SFRP1,SYK,TLR6,TRPM2,TUSC5
GO:0032501	multicellular organismal process	biological_process	195/414	7232/19098	1.24384	6.64059e-05	0.00185424	195	ABCA1,ABCB5,ABCG1,ACP5,ACTN3,ACVR1C,ADA2,ADAM28,ADAMTS18,ADAMTS4,ADAMTS9,ADGRV1,ADIPOQ,ADM,ADORA2A,AGTRAP,AKR1C1,AKR1C2,AKR1C3,ALB,ALDH3A2,ALPL,AQP1,AQP4,ARC,ARNTL,ARPC5,AVPR1A,BLNK,BTC,C1QB,C1QC,C3,C3AR1,C5AR1,C5orf30,C6,CADM1,CALM1,CCL2,CD248,CD4,CEBPA,CHL1,CHODL,CHRNA1,CITED2,CKMT2,CLDN5,CLEC3B,CMA1,COL11A1,COL11A2,CR1,CREG1,CSF1R,CSF3,CSRP1,CSRP3,CTSL,CXCL14,CYBB,DDX11,DGAT2,DOCK2,DSC2,DTX1,D…
GO:0009967	positive regulation of signal transduction	biological_process	56/414	1523/19098	1.69619	6.72868e-05	0.0018692	56	ADIPOQ,ADORA2A,AKR1C2,AKR1C3,ARC,ARNTL,BLNK,BTC,C3,C5AR1,CALM1,CCL2,CCL5,CD4,CITED2,CSF1R,CSF3,CXCL9,F2R,F2RL3,FCGR2B,FGF9,GPR37,GRAP2,HSP90AA1,HSPA1B,IL18,IL31RA,IL6,IL7R,KLB,LEP,LMCD1,MAP3K14,NAIP,NOS1,PDGFD,PIK3AP1,PIK3R2,PLA2G2A,PRKCB,PTP4A3,PYHIN1,RASGRP1,S100B,SFRP1,SFRP4,SH2D1A,SPHK1,SYK,TDGF1,TGM2,THBS1,TLR6,TLR7,ZNF385A
GO:0009306	protein secretion	biological_process	26/414	517/19098	2.31991	6.7486e-05	0.0018692	26	ABCA1,ACVR1C,ADORA2A,ARNTL,CADM1,CCL5,CSF1R,F2R,FCGR2B,GPAM,IL1RL1,IL6,ITGB6,KCNS3,LEP,PLEK,PNP,RAB37,RASGRP1,SFRP1,SLC25A4,STEAP3,SYK,TLR6,TLR8,TRPM2
GO:0006811	ion transport	biological_process	58/414	1597/19098	1.67537	6.91884e-05	0.00190866	58	ABCA1,ABCG1,ADAMTS8,ADORA2A,AKR1C1,ALB,AQP1,AQP4,ARC,ATP5F1D,AVPR1A,CA14,CALM1,CCL2,CCL5,CD4,CHRNA1,CLIC6,CP,CTSS,CXCL9,CYBB,DHRS7C,EMB,F2R,F2RL3,FOLR2,GABRE,GALNT8,KCNA6,KCNA7,KCNJ5,KCNS3,LEP,MPC1,NOS1,NSF,OPRD1,PDE4B,PLA2G2A,PLTP,PRKCB,SCN9A,SFRP4,SLC25A4,SLC37A2,SLC38A3,SLC39A14,SLC4A1,SLC6A6,SLC7A10,SLCO4A1,STEAP3,SYK,THBS1,THRSP,TRPM2,TRPV3
GO:0032502	developmental process	biological_process	168/414	6050/19098	1.28098	6.97546e-05	0.00191658	168	ABCA1,ABCB5,ABCG1,ACP5,ACTN3,ACVR1C,ADA2,ADAMTS18,ADAMTS4,ADAMTS9,ADGRV1,ADIPOQ,ADM,ADORA2A,AKR1C1,AKR1C2,AKR1C3,ALDH3A2,ALPL,AQP1,ARC,ARNTL,ARPC5,AVPR1A,BLNK,BTC,C1QB,C1QC,C3,C3AR1,C5AR1,C6,CADM1,CALM1,CCL2,CD248,CD4,CD53,CEBPA,CES1,CHL1,CHODL,CHRNA1,CITED2,CLDN5,CLEC3B,CMA1,COL11A1,COL11A2,CR1,CREG1,CSF1R,CSF3,CSRP3,CTSL,CXCL14,CXCL9,CYBB,DDX11,DGAT2,DLK1,DOCK2,DSC2,DTX1,DUSP2,E2F2,E2F8,EFEMP1,…
GO:0042129	regulation of T cell proliferation	biological_process	12/414	144/19098	3.8442	7.24361e-05	0.00198233	12	CCL5,CD209,CD4,GPAM,HLA-DMB,IL18,IL6,LEP,LMO1,PNP,PRKAR1A,SYK
GO:0048646	anatomical structure formation involved in morphogenesis	biological_process	42/414	1036/19098	1.87015	7.34752e-05	0.00199766	42	ADAMTS9,ADM,AQP1,C3,C3AR1,C5AR1,C6,CCL2,CD53,CITED2,CMA1,COL11A1,CSRP3,CXCL9,CYBB,DUSP2,E2F2,E2F8,FGF9,IL18,IL6,IRX3,ITGB2,LEP,MMP19,MYOM3,MYOZ3,NOS1,NR4A3,PRKAR1A,PRKCB,SERPINE1,SFRP1,SPHK1,SYK,TDGF1,TGM2,THBS1,THBS4,TNMD,TXNRD1,ZNF385A
GO:0002790	peptide secretion	biological_process	27/414	550/19098	2.26458	7.3578e-05	0.00199766	27	ABCA1,ACVR1C,ADORA2A,ARNTL,CADM1,CCL5,CSF1R,F2R,FCGR2B,GPAM,IL1RL1,IL6,ITGB6,KCNS3,LEP,PLEK,PNP,RAB37,RASGRP1,RASL10B,SFRP1,SLC25A4,STEAP3,SYK,TLR6,TLR8,TRPM2
GO:0034774	secretory granule lumen	cellular_component	19/414	319/19098	2.74758	7.45085e-05	0.00200705	19	ADA2,ALB,ARPC5,C3,CLEC3B,CREG1,DOCK2,F13A1,GRN,HSP90AA1,HSPA6,LGALS3BP,MAN2B1,PNP,RARRES2,SERPINB1,SERPINE1,SLPI,THBS1
GO:0051604	protein maturation	biological_process	19/414	319/19098	2.74758	7.45085e-05	0.00200705	19	C1QA,C1QB,C1QC,C1S,C2,C3,C3AR1,C4A,C4B,C5AR1,C6,CFB,CLEC3B,CMA1,CR1,CTSS,NAIP,SERPINE1,THBS1
GO:0071944	cell periphery	cellular_component	150/414	5283/19098	1.30978	7.50729e-05	0.00201436	150	ABCA1,ABCB5,ABCG1,ACKR4,ACVR1C,ADAM28,ADGRV1,ADORA2A,AGTRAP,ALPL,AQP1,AQP4,ARC,AVPR1A,BLNK,BTC,C3,C3AR1,C4A,C4B,C5AR1,C6,CA14,CADM1,CALM1,CD163L1,CD209,CD4,CD5,CD53,CD82,CFB,CHL1,CHRNA1,CISH,CLDN5,CLEC10A,CLIC6,CR1,CSF1R,CXCL9,CYBB,DSC2,EMB,EPB42,F2R,F2RL3,FABP7,FAT3,FCGR2B,FOLR2,FOSL1,FRAS1,GABRE,GALNT8,GPAM,GPR135,GPR174,GPR37,GPRC5A,GRAP2,HHIP,HLA-DMB,HLA-DQB1,HSP90AA1,IGLL5,IL10RA,IL12RB2,IL1…
GO:0019752	carboxylic acid metabolic process	biological_process	42/414	1039/19098	1.86475	7.83516e-05	0.00209415	42	ACSS1,ACTN3,ADIPOQ,ADSSL1,AKR1C1,AKR1C2,AKR1C3,ALDH3A2,AVPR1A,BCAT1,C3,CES1,CH25H,CKMT2,DGAT2,FOLR2,GLYAT,GOT1,GPAM,GPT2,HDAC4,HPGDS,LEP,LIPE,LYVE1,MPC1,NOS1,NQO1,NR4A3,OSBPL3,OSBPL6,PCK1,PDPR,PGAM2,PRKAG3,PRKAR2B,PTGS1,RENBP,SLC6A6,SYK,TECRL,VNN1
GO:0044425	membrane part	cellular_component	188/414	6943/19098	1.2491	8.10228e-05	0.00215715	188	ABCA1,ABCB5,ABCG1,AC024592.3,ACKR4,ACP5,ACVR1C,ADAM28,ADAMTS4,ADGRV1,ADORA2A,ADSSL1,AGTRAP,AL136295.3,ALDH3A2,ALPL,AQP1,AQP4,ARC,ASB18,ATP5F1D,AVPR1A,BDH1,BTC,BX088645.1,C3AR1,C5AR1,C6,CA14,CADM1,CALM1,CCDC197,CCDC80,CD163L1,CD209,CD248,CD4,CD5,CD53,CD82,CDS1,CH25H,CHL1,CHMP1B,CHODL,CHRNA1,CLDN5,CLEC10A,CLIC6,CR1,CSF1R,CXCL9,CYB561D2,CYBB,DGAT2,DHRS7C,DLK1,DSC2,EMB,EVI2A,EXTL1,F2R,F2RL3,FAM174B,F…
GO:0048659	smooth muscle cell proliferation	biological_process	11/414	124/19098	4.09222	8.2027e-05	0.00217546	11	ADIPOQ,CCL5,FGF9,HDAC4,IL18,IL6,NR4A3,PDGFD,TGM2,THBS1,VIPR2
GO:0071495	cellular response to endogenous stimulus	biological_process	50/414	1320/19098	1.74736	8.28982e-05	0.00219011	50	ADIPOQ,AGTRAP,AKR1C1,AKR1C2,AKR1C3,AQP1,ARNTL,AVPR1A,CCL2,CCL5,CISH,CITED2,CLDN5,CLEC3B,CTSL,CTSS,CYBB,DDX11,FBN1,FCGR2B,FGF9,FOLR2,GOT1,GPAM,HDAC4,HHIP,KLB,KLF1,LEP,NR4A3,PCK1,PDE4B,PDGFD,PIK3R2,PRKAR1A,PRKAR2B,PRKCB,PTGFR,RARRES2,RXRG,SFRP1,SFRP4,SHISA2,TDGF1,THBS1,TLR6,TNMD,TRPM2,TUSC5,WFIKKN1
GO:0042098	T cell proliferation	biological_process	13/414	169/19098	3.54849	8.35938e-05	0.0021951	13	CCL5,CD209,CD4,DOCK2,GPAM,HLA-DMB,IL18,IL6,LEP,LMO1,PNP,PRKAR1A,SYK
GO:0099024	plasma membrane invagination	biological_process	7/414	49/19098	6.59006	8.37263e-05	0.0021951	7	ABCA1,C3,FCGR2B,IGLL5,ITGAM,ITGB2,THBS1
GO:0015918	sterol transport	biological_process	9/414	84/19098	4.94255	8.48818e-05	0.00221693	9	ABCA1,ABCG1,ADIPOQ,AKR1C1,CES1,LEP,OSBPL3,OSBPL6,PLTP
GO:1901615	organic hydroxy compound metabolic process	biological_process	25/414	495/19098	2.32982	8.69235e-05	0.00226166	25	ABCA1,ABCG1,ACSS1,ACTN3,AKR1C1,AKR1C3,ALDH3A2,CALM1,CEBPA,CES1,CH25H,DGAT2,FDXR,GOT1,GPAM,GPR37,ITGAM,LEP,LIPE,OSBPL3,OSBPL6,PCK1,PLEK,PLTP,SPHK1
GO:0051897	positive regulation of protein kinase B signaling	biological_process	12/414	147/19098	3.76575	8.83982e-05	0.00228377	12	AKR1C2,AKR1C3,BTC,CSF3,FGF9,HSP90AA1,IL18,KLB,LEP,PIK3AP1,PIK3R2,THBS1
GO:0002699	positive regulation of immune effector process	biological_process	13/414	170/19098	3.52762	8.87708e-05	0.00228377	13	C3,C6,CADM1,HLA-DMB,IL18,IL6,ITGAM,ITGB2,NR4A3,RAET1E,RASGRP1,SH2D1A,SYK
GO:0050731	positive regulation of peptidyl-tyrosine phosphorylation	biological_process	13/414	170/19098	3.52762	8.87708e-05	0.00228377	13	ADIPOQ,CCL5,CD4,CSF1R,CSF3,HSPH1,IL18,IL31RA,IL6,LEP,SYK,TDGF1,THBS4
GO:0034599	cellular response to oxidative stress	biological_process	17/414	270/19098	2.90451	9.03583e-05	0.00231594	17	AKR1C3,AQP1,ARNTL,CYBB,GPR37,GPX3,HSPA1B,HSPH1,IL6,NQO1,NR4A3,PDGFD,SRXN1,TLR6,TRPM2,TXNRD1,VNN1
GO:1905521	regulation of macrophage migration	biological_process	5/414	22/19098	10.4842	9.07428e-05	0.00231715	5	C3AR1,C5AR1,CCL5,RARRES2,THBS1
GO:0048513	animal organ development	biological_process	104/414	3392/19098	1.41438	9.30099e-05	0.00236624	104	ABCB5,ACP5,ACTN3,ADAMTS18,ADAMTS9,ADGRV1,ADIPOQ,ADM,AKR1C3,ALPL,AQP1,ARNTL,ARPC5,AVPR1A,BLNK,C1QB,C1QC,C5AR1,CALM1,CCL2,CD248,CD4,CEBPA,CHODL,CHRNA1,CITED2,CLDN5,CLEC3B,CMA1,COL11A1,COL11A2,CR1,CSF1R,CSF3,CSRP3,CTSL,CXCL14,DGAT2,DOCK2,DSC2,DTX1,E2F8,EFEMP1,ELN,EPB42,FABP7,FBN1,FCGR2B,FGF9,FOSL1,FRAS1,HDAC4,HHIP,HIST1H3B,HIST1H3C,HIST1H3F,HIST1H3I,HSPA1B,IL18,IL31RA,IL6,IL7R,IRX3,ITGA2B,ITK,KERA,K…
GO:0048523	negative regulation of cellular process	biological_process	132/414	4544/19098	1.34006	9.35249e-05	0.00237056	132	ABCA1,ABCG1,ACP5,ACTN3,ACVR1C,ADAMTS18,ADAMTS8,ADAMTS9,ADGRV1,ADIPOQ,ADM,ADORA2A,AKR1C3,ALB,AQP1,ARNTL,AVPR1A,BTC,C1QC,C3,C4A,C4B,C5AR1,C5orf30,CALM1,CCL2,CCL5,CEBPA,CHL1,CIPC,CISH,CITED2,CR1,CREG1,CSF1R,CSF3,CST7,CXCL14,CXCL9,DGAT2,DHRS7C,DLK1,DNAJB1,DTX1,DUSP2,E2F8,EFEMP1,ERCC5,F2R,F2RL3,FABP7,FBN1,FCGR2B,FGF9,FOSL1,GPAM,GPR37,GPRC5A,HDAC4,HHIP,HIST1H1B,HIST1H2AJ,HIST1H3B,HIST1H3C,HIST1H3F,HIST…
GO:0002576	platelet degranulation	biological_process	11/414	126/19098	4.02726	9.4816e-05	0.00239445	11	ALB,CALM1,CLEC3B,F13A1,ITGA2B,LGALS3BP,PLEK,RARRES2,SERPINE1,SYK,THBS1
GO:0043066	negative regulation of apoptotic process	biological_process	36/414	847/19098	1.96068	9.70981e-05	0.0024192	36	ADORA2A,ALB,AQP1,BTC,C5AR1,CCL2,CCL5,CHL1,CITED2,CSF1R,ERCC5,F2R,GPAM,HHIP,HSPA1B,HSPH1,IER3,IL31RA,IL6,LEP,MDM4,MPV17L,NAIP,NQO1,NR4A3,PPT1,PTGFR,RFFL,SERPINB2,SERPINE1,SFRP1,SPHK1,TDGF1,THBS1,VNN1,ZNF385A
GO:0019401	alditol biosynthetic process	biological_process	3/414	5/19098	27.6783	9.79092e-05	0.0024192	3	GOT1,LEP,PCK1
GO:0065010	extracellular membrane-bounded organelle	cellular_component	3/414	5/19098	27.6783	9.79092e-05	0.0024192	3	ALPL,AQP1,PHOSPHO1
GO:0071798	response to prostaglandin D	biological_process	3/414	5/19098	27.6783	9.79092e-05	0.0024192	3	AKR1C2,AKR1C3,PTGFR
GO:0071799	cellular response to prostaglandin D stimulus	biological_process	3/414	5/19098	27.6783	9.79092e-05	0.0024192	3	AKR1C2,AKR1C3,PTGFR
GO:2001199	negative regulation of dendritic cell differentiation	biological_process	3/414	5/19098	27.6783	9.79092e-05	0.0024192	3	FCGR2B,TMEM176A,TMEM176B
GO:0050663	cytokine secretion	biological_process	14/414	196/19098	3.29503	0.000100164	0.00246339	14	ABCA1,CADM1,CSF1R,F2R,FCGR2B,GPAM,IL1RL1,ITGB6,LEP,PNP,RASGRP1,SYK,TLR6,TLR8
GO:0009611	response to wounding	biological_process	30/414	654/19098	2.11607	0.000100415	0.00246339	30	ADAMTS18,ADM,ADORA2A,CHL1,CSRP1,F13A1,F2R,F2RL3,HBD,HIST1H3B,HIST1H3C,HIST1H3F,HIST1H3I,IL6,ITGA2B,LYVE1,NAIP,PDGFD,PLEK,PRKAR1A,PRKAR2B,PRKCB,SDC1,SERPINB2,SERPINE1,SYK,TFPI2,THBS1,TMEM110-MUSTN1,TREML1
GO:0014065	phosphatidylinositol 3-kinase signaling	biological_process	11/414	127/19098	3.99555	0.000101825	0.00248909	11	CCL5,CSF3,F2R,IER3,IL18,LEP,NYAP2,PDGFD,PIK3AP1,PIK3R2,RASGRP1
GO:0042089	cytokine biosynthetic process	biological_process	10/414	106/19098	4.35193	0.000102764	0.00250314	10	CD4,CMA1,CYBB,IL18,IL6,SYK,THBS1,TLR6,TLR7,TLR8
GO:0015850	organic hydroxy compound transport	biological_process	15/414	222/19098	3.11692	0.000106722	0.00259037	15	ABCA1,ABCG1,ADIPOQ,ADORA2A,AKR1C1,ALB,AQP1,CES1,EMB,LEP,NOS1,OSBPL3,OSBPL6,PLTP,SYK
GO:0042107	cytokine metabolic process	biological_process	10/414	107/19098	4.31126	0.000111207	0.00268928	10	CD4,CMA1,CYBB,IL18,IL6,SYK,THBS1,TLR6,TLR7,TLR8
GO:0006820	anion transport	biological_process	28/414	595/19098	2.17084	0.00011158	0.00268928	28	ABCA1,ABCG1,ADAMTS8,ADORA2A,AKR1C1,ALB,AQP1,AVPR1A,CA14,CLIC6,EMB,FOLR2,GABRE,LEP,MPC1,PLA2G2A,PLTP,SFRP4,SLC25A4,SLC37A2,SLC38A3,SLC4A1,SLC6A6,SLC7A10,SLCO4A1,SYK,THBS1,THRSP
GO:1905517	macrophage migration	biological_process	6/414	36/19098	7.68841	0.000112343	0.00269818	6	C3AR1,C5AR1,CCL2,CCL5,RARRES2,THBS1
GO:0006629	lipid metabolic process	biological_process	52/414	1411/19098	1.70006	0.00011853	0.00283688	52	ABCA1,ABCG1,ACSS1,ADIPOQ,ADM,AKR1C1,AKR1C2,AKR1C3,ALDH3A2,AOAH,AVPR1A,BTC,C3,CDS1,CEBPA,CES1,CH25H,CSF1R,DGAT2,FABP7,FDXR,FGF9,GPAM,HPGDS,HRASLS5,KLB,LEP,LIPE,NR4A3,NRBF2,OSBPL3,OSBPL6,PCK1,PDPR,PHOSPHO1,PIK3AP1,PIK3R2,PLA2G2A,PLBD1,PLEK,PLIN1,PLTP,PPT1,PRKAG3,PRKAR2B,PTGS1,RARRES2,SDC1,SPHK1,TECRL,THRSP,TXNRD1
GO:0033002	muscle cell proliferation	biological_process	13/414	176/19098	3.40736	0.000126048	0.00300634	13	ADIPOQ,CCL5,CITED2,FGF9,HDAC4,IL18,IL6,NR4A3,PDGFD,PRKAR1A,TGM2,THBS1,VIPR2
GO:0023056	positive regulation of signaling	biological_process	59/414	1671/19098	1.62878	0.000129009	0.00305917	59	ADIPOQ,ADORA2A,AKR1C2,AKR1C3,ARC,ARNTL,BLNK,BTC,C3,C5AR1,CALM1,CCL2,CCL5,CD4,CITED2,CSF1R,CSF3,CXCL9,F2R,F2RL3,FCGR2B,FGF9,GPR37,GRAP2,HSP90AA1,HSPA1B,IL18,IL31RA,IL6,IL7R,KLB,LEP,LMCD1,MAP3K14,NAIP,NOS1,NSF,PDGFD,PIK3AP1,PIK3R2,PLA2G2A,PRKCB,PTP4A3,PYHIN1,RASGRP1,RASL10B,S100B,SFRP1,SFRP4,SH2D1A,SPHK1,SYK,TDGF1,TGM2,THBS1,TLR6,TLR7,TRPM2,ZNF385A
GO:0045595	regulation of cell differentiation	biological_process	60/414	1708/19098	1.62051	0.000129154	0.00305917	60	ABCA1,ABCG1,ACTN3,ADAMTS9,ADGRV1,ADIPOQ,ADM,ARC,ARNTL,BTC,C1QC,CD4,CD53,CEBPA,CHODL,CLDN5,CR1,CSF3,CTSL,CXCL14,CXCL9,DTX1,EFEMP1,FBN1,FCGR2B,FGF9,HDAC4,HIST1H3B,HIST1H3C,HIST1H3F,HIST1H3I,HSPA1B,IL18,IL6,IL7R,IRX3,ITGA2B,LEP,LMO1,MAP2,MMD,NMRK2,NOS1,NR4A3,PLA2G2A,PNP,PRKCB,RARRES2,RASGRP1,S100B,SERPINE1,SFRP1,SFRP4,SMOC1,SYK,THBS1,TMEM176A,TMEM176B,VNN1,ZNF385A
GO:0071229	cellular response to acid chemical	biological_process	14/414	201/19098	3.21307	0.000130839	0.00307303	14	ABCA1,AKR1C1,AKR1C2,AKR1C3,AQP1,AVPR1A,CYBB,DGAT2,FOLR2,LEP,PCK1,PDGFD,PTGFR,SFRP1
GO:0019932	second-messenger-mediated signaling	biological_process	19/414	333/19098	2.63207	0.00013085	0.00307303	19	ABCA1,ACTN3,ADM,ADORA2A,AVPR1A,CALM1,CD4,CXCL9,HDAC4,LMCD1,NOS1,PLEK,PTGFR,RCAN2,SELE,SPHK1,SYK,THBS1,TRPM2
GO:0035556	intracellular signal transduction	biological_process	86/414	2703/19098	1.46771	0.000131082	0.00307303	86	ABCA1,ACTN3,ADIPOQ,ADM,ADORA2A,AKR1C2,AKR1C3,ARHGAP20,ARHGAP36,ARNTL,ASB14,ASB18,AVPR1A,BLNK,BTC,C5AR1,CALM1,CCL2,CCL5,CD209,CD4,CISH,CSF1R,CSF3,CXCL9,DOCK2,DUSP2,E2F2,E2F8,F2R,F2RL3,FCGR2B,FGF9,GPR37,GRAP2,HDAC4,HSP90AA1,HSPA1B,HSPH1,IER3,IL18,IL1RL1,IL31RA,IL6,IL7R,ITK,KLB,LEP,LMCD1,MAP3K14,MDM4,NCAM1,NOS1,NYAP2,PDGFD,PIK3AP1,PIK3R2,PLA2G2A,PLEK,PPP1R1B,PRKAG3,PRKAR1A,PRKAR2B,PRKCB,PTGFR,PTP4A3…
GO:0030593	neutrophil chemotaxis	biological_process	9/414	89/19098	4.66488	0.000133263	0.00311356	9	C3AR1,C5AR1,CCL2,CCL5,CXCL3,ITGB2,PDE4B,SYK,THBS4
GO:1902105	regulation of leukocyte differentiation	biological_process	16/414	253/19098	2.91734	0.000137455	0.00319835	16	ADIPOQ,C1QC,CD4,CR1,DTX1,FBN1,FCGR2B,IL18,IL7R,PNP,RASGRP1,SFRP1,SYK,TMEM176A,TMEM176B,VNN1
GO:0048015	phosphatidylinositol-mediated signaling	biological_process	12/414	154/19098	3.59458	0.000137824	0.00319835	12	CCL5,CSF1R,CSF3,F2R,IER3,IL18,LEP,NYAP2,PDGFD,PIK3AP1,PIK3R2,RASGRP1
GO:0008217	regulation of blood pressure	biological_process	13/414	178/19098	3.36908	0.000141159	0.00325377	13	ADIPOQ,ADM,AGTRAP,AVPR1A,CMA1,F2R,LEP,LVRN,NOS1,PTGS1,RASL10B,RENBP,SLC2A5
GO:0050920	regulation of chemotaxis	biological_process	13/414	178/19098	3.36908	0.000141159	0.00325377	13	C3AR1,C5AR1,CCL2,CCL5,CXCL14,CXCL3,CXCL9,IL6,PDGFD,RARRES2,SERPINE1,THBS1,THBS4
GO:0044281	small molecule metabolic process	biological_process	71/414	2130/19098	1.53768	0.000146618	0.00336164	71	ABCA1,ABCG1,ACP5,ACSS1,ACTN3,ADA2,ADIPOQ,ADM,ADORA2A,ADSSL1,AKR1C1,AKR1C2,AKR1C3,ALDH3A2,AQP1,ATP5F1D,AVPR1A,BCAT1,BDH1,C3,CALM1,CEBPA,CES1,CH25H,CKMT2,COQ10A,CXCL9,DGAT2,FDXR,FOLR2,GLYAT,GOT1,GPAM,GPT2,HDAC4,HPGDS,HSPA1B,KERA,LEP,LIPE,LYVE1,MAN2B1,MPC1,NME1-NME2,NMRK2,NOS1,NQO1,NR4A3,OSBPL3,OSBPL6,PALM,PCK1,PDE4B,PDE4C,PDPR,PGAM2,PLEK,PLTP,PNP,PRKAG3,PRKAR2B,PTGS1,RENBP,RPE,SLC6A6,SPHK1,SYK,TECR…
GO:0032637	interleukin-8 production	biological_process	8/414	71/19098	5.1978	0.000147009	0.00336164	8	ADIPOQ,F2R,HSPA1B,LEP,SERPINE1,TLR6,TLR7,TLR8
GO:0034762	regulation of transmembrane transport	biological_process	25/414	512/19098	2.25246	0.000147307	0.00336164	25	ADIPOQ,ARC,C3,CALM1,CLIC6,CTSS,CXCL9,CYBB,DHRS7C,F2R,F2RL3,GALNT8,KCNA6,KCNA7,KCNJ5,KCNS3,LEP,NOS1,NR4A3,PDE4B,PIK3R2,PRKCB,RARRES2,SCN9A,THBS1
GO:0031224	intrinsic component of membrane	cellular_component	160/414	5783/19098	1.2763	0.000147853	0.00336293	160	ABCA1,ABCB5,ABCG1,ACKR4,ACP5,ACVR1C,ADAM28,ADAMTS4,ADGRV1,ADORA2A,ADSSL1,AGTRAP,AL136295.3,ALDH3A2,ALPL,AQP1,AQP4,ASB18,AVPR1A,BTC,BX088645.1,C3AR1,C5AR1,C6,CA14,CADM1,CALM1,CCDC197,CCDC80,CD163L1,CD209,CD248,CD4,CD5,CD53,CD82,CDS1,CH25H,CHL1,CHODL,CHRNA1,CLDN5,CLEC10A,CLIC6,CR1,CSF1R,CYB561D2,CYBB,DGAT2,DLK1,DSC2,EMB,EVI2A,EXTL1,F2R,F2RL3,FAM174B,FAT3,FCGR2B,FMO3,FOLR2,FRAS1,GABRE,GALNT8,GALNTL6…
GO:0001910	regulation of leukocyte mediated cytotoxicity	biological_process	7/414	54/19098	5.97987	0.000157291	0.00356234	7	CADM1,FCGR2B,IL7R,LEP,RAET1E,RASGRP1,SH2D1A
GO:0042060	wound healing	biological_process	26/414	545/19098	2.20072	0.000157658	0.00356234	26	ADAMTS18,ADORA2A,CSRP1,F13A1,F2R,F2RL3,HBD,HIST1H3B,HIST1H3C,HIST1H3F,HIST1H3I,IL6,ITGA2B,PDGFD,PLEK,PRKAR1A,PRKAR2B,PRKCB,SDC1,SERPINB2,SERPINE1,SYK,TFPI2,THBS1,TMEM110-MUSTN1,TREML1
GO:1903409	reactive oxygen species biosynthetic process	biological_process	9/414	91/19098	4.56235	0.000158194	0.00356273	9	ACP5,CYBB,HDAC4,HSP90AA1,ITGB2,MPV17L,NOS1,NQO1,TLR6
GO:0006082	organic acid metabolic process	biological_process	44/414	1144/19098	1.77425	0.000162357	0.00364454	44	ACSS1,ACTN3,ADIPOQ,ADSSL1,AKR1C1,AKR1C2,AKR1C3,ALDH3A2,AVPR1A,BCAT1,C3,CES1,CH25H,CKMT2,DGAT2,FOLR2,GLYAT,GOT1,GPAM,GPT2,HDAC4,HPGDS,KERA,LEP,LIPE,LYVE1,MPC1,NOS1,NQO1,NR4A3,OSBPL3,OSBPL6,PCK1,PDPR,PGAM2,PNP,PRKAG3,PRKAR2B,PTGS1,RENBP,SLC6A6,SYK,TECRL,VNN1
GO:0048017	inositol lipid-mediated signaling	biological_process	12/414	157/19098	3.52589	0.000165343	0.00369948	12	CCL5,CSF1R,CSF3,F2R,IER3,IL18,LEP,NYAP2,PDGFD,PIK3AP1,PIK3R2,RASGRP1
GO:0048519	negative regulation of biological process	biological_process	142/414	5025/19098	1.30359	0.000169025	0.00376958	142	ABCA1,ABCG1,ACP5,ACTN3,ACVR1C,ADAMTS18,ADAMTS8,ADAMTS9,ADGRV1,ADIPOQ,ADM,ADORA2A,AKR1C3,ALB,AOAH,AQP1,ARNTL,AVPR1A,BTC,C1QC,C3,C4A,C4B,C5AR1,C5orf30,CALM1,CCL2,CCL5,CEBPA,CHL1,CIPC,CISH,CITED2,CR1,CREG1,CSF1R,CSF3,CST7,CXCL14,CXCL9,DGAT2,DHRS7C,DLK1,DNAJB1,DTX1,DUSP2,E2F2,E2F8,EFEMP1,ERCC5,F2R,F2RL3,FABP7,FBN1,FCGR2B,FGF9,FOSL1,GABRE,GPAM,GPR37,GPRC5A,HDAC4,HHIP,HIST1H1B,HIST1H2AJ,HIST1H3B,HIST1H…
GO:0071402	cellular response to lipoprotein particle stimulus	biological_process	5/414	25/19098	9.22609	0.000173531	0.00385755	5	ABCA1,ABCG1,ITGB2,SYK,TLR6
GO:0031960	response to corticosteroid	biological_process	12/414	158/19098	3.50358	0.000175502	0.00388879	12	ADIPOQ,ADM,AKR1C3,ALPL,AQP1,AVPR1A,CYBB,FOSL1,GOT1,IL6,S100B,SDC1
GO:0043030	regulation of macrophage activation	biological_process	6/414	39/19098	7.09699	0.000178138	0.00393451	6	FCGR2B,IL1RL1,IL31RA,ITGAM,THBS1,TLR6
GO:0001846	opsonin binding	molecular_function	4/414	14/19098	13.1801	0.000183355	0.00402385	4	C4A,CR1,ITGAM,ITGB2
GO:0010875	positive regulation of cholesterol efflux	biological_process	4/414	14/19098	13.1801	0.000183355	0.00402385	4	ABCA1,ABCG1,ADIPOQ,PLTP
GO:0044433	cytoplasmic vesicle part	cellular_component	52/414	1437/19098	1.6693	0.000186047	0.00406992	52	ADA2,AGTRAP,ALB,ARPC5,C3,C3AR1,C5AR1,CD4,CD53,CHMP1B,CLEC3B,CR1,CREG1,CTSL,CTSS,CYBB,DOCK2,F13A1,GPRC5A,GRN,HLA-DMB,HSP90AA1,HSPA1B,HSPA6,HSPH1,IL7R,ITGA2B,ITGAM,ITGB2,LGALS3BP,MAN2B1,MARCH1,MMD,MRC1,PNP,RAB37,RAB40C,RARRES2,RFFL,SERPINB1,SERPINE1,SIRPA,SLC2A5,SLPI,STEAP3,THBS1,TLR6,TLR7,TLR8,TRPM2,TUSC5,VNN1
GO:1901617	organic hydroxy compound biosynthetic process	biological_process	15/414	234/19098	2.95708	0.000190634	0.00415346	15	ABCG1,ACTN3,AKR1C3,CES1,CH25H,GOT1,GPAM,GPR37,LEP,OSBPL3,OSBPL6,PCK1,PLEK,PLTP,SPHK1
GO:0015711	organic anion transport	biological_process	23/414	460/19098	2.30652	0.000191771	0.00415346	23	ABCA1,ABCG1,ADORA2A,AKR1C1,ALB,AQP1,AVPR1A,CA14,EMB,FOLR2,LEP,MPC1,PLA2G2A,PLTP,SLC25A4,SLC38A3,SLC4A1,SLC6A6,SLC7A10,SLCO4A1,SYK,THBS1,THRSP
GO:1902531	regulation of intracellular signal transduction	biological_process	62/414	1808/19098	1.58191	0.000191967	0.00415346	62	ABCA1,ACTN3,ADIPOQ,AKR1C2,AKR1C3,ARHGAP20,ARHGAP36,ARNTL,BTC,C5AR1,CALM1,CCL2,CCL5,CD4,CISH,CSF1R,CSF3,CXCL9,DUSP2,F2R,F2RL3,FCGR2B,FGF9,GPR37,HSP90AA1,HSPA1B,HSPH1,IER3,IL18,IL1RL1,IL31RA,IL6,IL7R,KLB,LEP,LMCD1,MAP3K14,MDM4,NOS1,PDGFD,PIK3AP1,PIK3R2,PLA2G2A,PLEK,PRKAG3,PRKCB,PTP4A3,PYHIN1,RASGRP1,RCAN2,RFFL,S100B,SFRP1,SPHK1,SYK,TDGF1,TGM2,THBS1,TLR6,TLR7,VNN1,ZNF385A
GO:0048731	system development	biological_process	132/414	4615/19098	1.31944	0.000192284	0.00415346	132	ABCB5,ACP5,ACTN3,ADAMTS18,ADAMTS4,ADAMTS9,ADGRV1,ADIPOQ,ADM,ADORA2A,AKR1C3,ALDH3A2,ALPL,AQP1,ARC,ARNTL,ARPC5,AVPR1A,BLNK,C1QB,C1QC,C3,C3AR1,C5AR1,C6,CALM1,CCL2,CD248,CD4,CEBPA,CHL1,CHODL,CHRNA1,CITED2,CLDN5,CLEC3B,CMA1,COL11A1,COL11A2,CR1,CSF1R,CSF3,CSRP3,CTSL,CXCL14,CYBB,DGAT2,DOCK2,DSC2,DTX1,E2F2,E2F8,EFEMP1,ELN,EPB42,EXTL1,FABP7,FBN1,FCGR2B,FGF9,FOSL1,FRAS1,HDAC4,HHIP,HIST1H3B,HIST1H3C,HIST1H3…
GO:0006968	cellular defense response	biological_process	7/414	56/19098	5.7663	0.000198464	0.00427351	7	ADORA2A,C5AR1,CXCL9,FOSL1,ITK,LGALS3BP,SH2D1A
GO:0030225	macrophage differentiation	biological_process	6/414	40/19098	6.91957	0.000205782	0.00441724	6	ADIPOQ,C1QC,CEBPA,CSF1R,CSF3,IL31RA
GO:0006066	alcohol metabolic process	biological_process	18/414	317/19098	2.61939	0.000207493	0.00444009	18	ABCA1,ABCG1,ACSS1,AKR1C3,ALDH3A2,CALM1,CEBPA,CES1,CH25H,DGAT2,FDXR,GOT1,GPAM,LEP,LIPE,PCK1,PLEK,SPHK1
GO:0010647	positive regulation of cell communication	biological_process	58/414	1665/19098	1.60695	0.000211032	0.0045018	58	ADIPOQ,ADORA2A,AKR1C2,AKR1C3,ARC,ARNTL,BLNK,BTC,C3,C5AR1,CALM1,CCL2,CCL5,CD4,CITED2,CSF1R,CSF3,CXCL9,F2R,F2RL3,FCGR2B,FGF9,GPR37,GRAP2,HSP90AA1,HSPA1B,IL18,IL31RA,IL6,IL7R,KLB,LEP,LMCD1,MAP3K14,NAIP,NOS1,PDGFD,PIK3AP1,PIK3R2,PLA2G2A,PRKCB,PTP4A3,PYHIN1,RASGRP1,RASL10B,S100B,SFRP1,SFRP4,SH2D1A,SPHK1,SYK,TDGF1,TGM2,THBS1,TLR6,TLR7,TRPM2,ZNF385A
GO:0001618	virus receptor activity	molecular_function	8/414	75/19098	4.92058	0.000216224	0.00458408	8	CD209,CD4,CR1,HSPA1B,ITGB6,MRC1,NCAM1,SELPLG
GO:0104005	hijacked molecular function	molecular_function	8/414	75/19098	4.92058	0.000216224	0.00458408	8	CD209,CD4,CR1,HSPA1B,ITGB6,MRC1,NCAM1,SELPLG
GO:0010324	membrane invagination	biological_process	7/414	57/19098	5.66514	0.000222087	0.00469389	7	ABCA1,C3,FCGR2B,IGLL5,ITGAM,ITGB2,THBS1
GO:0043436	oxoacid metabolic process	biological_process	43/414	1128/19098	1.75852	0.000233985	0.00493018	43	ACSS1,ACTN3,ADIPOQ,ADSSL1,AKR1C1,AKR1C2,AKR1C3,ALDH3A2,AVPR1A,BCAT1,C3,CES1,CH25H,CKMT2,DGAT2,FOLR2,GLYAT,GOT1,GPAM,GPT2,HDAC4,HPGDS,KERA,LEP,LIPE,LYVE1,MPC1,NOS1,NQO1,NR4A3,OSBPL3,OSBPL6,PCK1,PDPR,PGAM2,PRKAG3,PRKAR2B,PTGS1,RENBP,SLC6A6,SYK,TECRL,VNN1
GO:0016021	integral component of membrane	cellular_component	156/414	5661/19098	1.27121	0.000235909	0.00495553	156	ABCA1,ABCB5,ABCG1,ACKR4,ACP5,ACVR1C,ADAM28,ADAMTS4,ADGRV1,ADORA2A,ADSSL1,AGTRAP,AL136295.3,ALDH3A2,ALPL,AQP1,AQP4,ASB18,AVPR1A,BTC,BX088645.1,C3AR1,C5AR1,C6,CA14,CADM1,CALM1,CCDC197,CCDC80,CD163L1,CD209,CD248,CD4,CD5,CD53,CD82,CDS1,CH25H,CHL1,CHODL,CHRNA1,CLDN5,CLEC10A,CLIC6,CR1,CSF1R,CYB561D2,CYBB,DGAT2,DLK1,DSC2,EMB,EVI2A,EXTL1,F2R,F2RL3,FAM174B,FAT3,FCGR2B,FMO3,FRAS1,GABRE,GALNT8,GALNTL6,GPAM,…
GO:0002705	positive regulation of leukocyte mediated immunity	biological_process	9/414	96/19098	4.32473	0.000237987	0.00498394	9	C3,CADM1,IL6,ITGAM,ITGB2,RAET1E,RASGRP1,SH2D1A,SYK
GO:0032695	negative regulation of interleukin-12 production	biological_process	4/414	15/19098	12.3014	0.000245765	0.00513118	4	ACP5,THBS1,TIGIT,TLR8
GO:0042108	positive regulation of cytokine biosynthetic process	biological_process	7/414	58/19098	5.56747	0.000247924	0.00516058	7	CD4,CYBB,SYK,THBS1,TLR6,TLR7,TLR8
GO:0048878	chemical homeostasis	biological_process	41/414	1062/19098	1.78093	0.000253087	0.00525212	41	ABCA1,ABCG1,ADIPOQ,ADM,ADORA2A,AKR1C1,AQP1,AQP4,AVPR1A,C3AR1,C5AR1,CALM1,CCL5,CD4,CEBPA,CMA1,CP,CSRP3,CXCL9,DGAT2,DHRS7C,EPB42,F2R,F2RL3,GOT1,GPAM,IL18,LEP,NOS1,PCK1,PIK3R2,PPT1,PRKAR1A,PRKAR2B,PRKCB,SFRP4,SLC39A14,SLC4A1,STEAP3,TGM2,TRPM2
GO:0035239	tube morphogenesis	biological_process	33/414	789/19098	1.92941	0.000254422	0.00526393	33	ADAMTS9,ADM,AQP1,C3,C3AR1,C5AR1,C6,CCL2,CITED2,CMA1,CSF1R,CYBB,E2F2,E2F8,FGF9,HHIP,IL18,IL6,IRX3,ITGB2,LEP,MMP19,NR4A3,PRKCB,SERPINE1,SFRP1,SPHK1,SYK,TDGF1,TGM2,THBS1,THBS4,TNMD
GO:0014066	regulation of phosphatidylinositol 3-kinase signaling	biological_process	9/414	97/19098	4.28014	0.000257395	0.00530946	9	CCL5,CSF3,F2R,IER3,IL18,LEP,PDGFD,PIK3AP1,RASGRP1
GO:1904894	positive regulation of STAT cascade	biological_process	8/414	77/19098	4.79277	0.000259731	0.00534159	8	CCL5,CSF1R,F2R,IL18,IL31RA,IL6,IL7R,LEP
GO:0043270	positive regulation of ion transport	biological_process	15/414	241/19098	2.87119	0.000262221	0.00537671	15	ADORA2A,ARC,AVPR1A,CALM1,CCL2,CCL5,CD4,CTSS,CXCL9,F2R,F2RL3,LEP,NOS1,SLC38A3,TRPV3
GO:0002706	regulation of lymphocyte mediated immunity	biological_process	10/414	119/19098	3.87651	0.000267629	0.00547126	10	C3,CADM1,CR1,FCGR2B,IL6,IL7R,LEP,RAET1E,RASGRP1,SH2D1A
GO:0048522	positive regulation of cellular process	biological_process	138/414	4907/19098	1.29733	0.000277733	0.00566097	138	ACTN3,ACVR1C,ADAMTS9,ADIPOQ,ADM,ADORA2A,AKR1C2,AKR1C3,AQP1,ARC,ARNTL,ARPC5,AVPR1A,BLNK,BTC,C2,C3,C3AR1,C4A,C4B,C5AR1,C6,CADM1,CALM1,CCL2,CCL5,CD209,CD248,CD4,CD5,CD53,CEBPA,CITED2,CLDN5,CLEC3B,CR1,CREB5,CSF1R,CSF3,CSRP3,CXCL14,CXCL3,CXCL9,CYBB,DCUN1D4,DDX11,DGAT2,DOCK2,E2F2,E2F8,ERCC5,F2R,F2RL3,FCGR2B,FGF9,FOLR2,FOSL1,GPAM,GPR37,GRAP2,HDAC4,HIST1H1B,HLA-DMB,HSP90AA1,HSPA1B,HSPH1,IGLL5,IL12RB2,IL1…
GO:0043067	regulation of programmed cell death	biological_process	53/414	1498/19098	1.63212	0.00027911	0.00567222	53	ACTN3,ACVR1C,ADIPOQ,ADM,ADORA2A,AKR1C3,ALB,AQP1,BTC,C5AR1,CCL2,CCL5,CD248,CHL1,CIDEC,CITED2,CSF1R,ERCC5,F2R,FOSL1,GPAM,HDAC4,HHIP,HSPA1B,HSPH1,IER3,IL31RA,IL6,LEP,MAP3K14,MDM4,MPV17L,NAIP,NQO1,NR4A3,PPT1,PTGFR,RFFL,S100B,SERPINB2,SERPINE1,SFRP1,SFRP4,SLC25A4,SPHK1,STEAP3,TDGF1,TGM2,THBS1,TNFAIP8L2,TOP2A,VNN1,ZNF385A
GO:0007275	multicellular organism development	biological_process	144/414	5167/19098	1.28562	0.000288562	0.00584699	144	ABCB5,ACP5,ACTN3,ACVR1C,ADA2,ADAMTS18,ADAMTS4,ADAMTS9,ADGRV1,ADIPOQ,ADM,ADORA2A,AKR1C3,ALDH3A2,ALPL,AQP1,ARC,ARNTL,ARPC5,AVPR1A,BLNK,C1QB,C1QC,C3,C3AR1,C5AR1,C6,CADM1,CALM1,CCL2,CD248,CD4,CEBPA,CHL1,CHODL,CHRNA1,CITED2,CLDN5,CLEC3B,CMA1,COL11A1,COL11A2,CR1,CREG1,CSF1R,CSF3,CSRP3,CTSL,CXCL14,CYBB,DDX11,DGAT2,DOCK2,DSC2,DTX1,DUSP2,E2F2,E2F8,EFEMP1,EGFL6,ELN,EPB42,EXTL1,FABP7,FAT3,FBN1,FCGR2B,FGF9,F…
GO:0071417	cellular response to organonitrogen compound	biological_process	25/414	536/19098	2.15161	0.000295479	0.00595259	25	ADIPOQ,AGTRAP,AQP1,CISH,CYBB,DDX11,FBN1,FCGR2B,FOLR2,GOT1,KLF1,LEP,NR4A3,PCK1,PDE4B,PDGFD,PIK3R2,PRKAR1A,PRKAR2B,PRKCB,RARRES2,SFRP1,TLR6,TRPM2,TUSC5
GO:0006631	fatty acid metabolic process	biological_process	19/414	355/19098	2.46895	0.000295507	0.00595259	19	ACSS1,ADIPOQ,AKR1C2,AKR1C3,ALDH3A2,AVPR1A,C3,CES1,DGAT2,GPAM,HPGDS,LEP,LIPE,NR4A3,PDPR,PRKAG3,PRKAR2B,PTGS1,TECRL
GO:0045637	regulation of myeloid cell differentiation	biological_process	15/414	244/19098	2.83589	0.000299375	0.00601288	15	ADIPOQ,C1QC,CD4,CSF3,FBN1,HIST1H3B,HIST1H3C,HIST1H3F,HIST1H3I,HSPA1B,ITGA2B,NR4A3,PRKCB,SFRP1,THBS1
GO:0046677	response to antibiotic	biological_process	18/414	327/19098	2.53929	0.000302666	0.00606126	18	ADIPOQ,ALPL,AQP1,CLDN5,CSF3,CYBB,DDX11,FOSL1,GPR37,HSP90AA1,HSPH1,IL6,LEP,NQO1,NR4A3,PDGFD,SDC1,TRPM2
GO:2000026	regulation of multicellular organismal development	biological_process	63/414	1878/19098	1.54751	0.00030865	0.00616313	63	ACTN3,ACVR1C,ADAMTS9,ADIPOQ,ADM,AQP1,ARC,ARNTL,C1QC,C3,C3AR1,C5AR1,C6,CD4,CHODL,CITED2,CLDN5,CMA1,CR1,CSF3,CTSL,CYBB,DTX1,E2F2,EFEMP1,FBN1,FCGR2B,FGF9,HDAC4,HIST1H3B,HIST1H3C,HIST1H3F,HIST1H3I,HSPA1B,IL18,IL6,IL7R,IRX3,ITGA2B,ITGB2,LEP,LMO1,MAP2,MMD,NOS1,NR4A3,PDGFD,PHOSPHO1,PNP,PRKCB,RASGRP1,S100B,SERPINE1,SFRP1,SFRP4,SPHK1,SYK,THBS1,THBS4,TMEM176A,TMEM176B,TNMD,VNN1
GO:0032268	regulation of cellular protein metabolic process	biological_process	80/414	2536/19098	1.45522	0.00031185	0.00620899	80	ACVR1C,ADIPOQ,ADORA2A,AQP1,ARNTL,C3,C4A,C4B,C5AR1,C6,CALM1,CCL2,CCL5,CD4,CEBPA,CISH,CLEC3B,CR1,CSF1R,CSF3,CST7,DCUN1D4,DUSP2,F2R,FCGR2B,FGF9,GPR37,GPRC5A,HDAC4,HIST1H1B,HIST1H3B,HIST1H3C,HIST1H3F,HIST1H3I,HSP90AA1,HSPA1B,HSPH1,IL18,IL31RA,IL6,ITGB2,KLB,LEP,LONRF3,MAP3K14,MMD,NAIP,NOS1,OPRD1,PDGFD,PIK3R2,PLA2G2A,PPP1R1B,PPP1R3C,PRKAR1A,PRKAR2B,PRR16,PYHIN1,RARRES2,RASGRP1,RCAN2,RENBP,RFFL,SERPINB1…
GO:0008015	blood circulation	biological_process	24/414	507/19098	2.18369	0.000314032	0.00623436	24	ADIPOQ,ADM,ADORA2A,AGTRAP,AVPR1A,C3AR1,CALM1,CMA1,CSRP3,DSC2,ELN,F2R,HDAC4,KCNJ5,LEP,LVRN,MYL3,NOS1,PDE4B,PTGS1,PTP4A3,RASL10B,RENBP,SLC2A5
GO:0042448	progesterone metabolic process	biological_process	4/414	16/19098	11.5326	0.0003221	0.0063761	4	ADM,AKR1C1,AKR1C2,AKR1C3
GO:1990266	neutrophil migration	biological_process	9/414	100/19098	4.15174	0.000323648	0.00638834	9	C3AR1,C5AR1,CCL2,CCL5,CXCL3,ITGB2,PDE4B,SYK,THBS4
GO:0004032	alditol:NADP+ 1-oxidoreductase activity	molecular_function	3/414	7/19098	19.7702	0.000331737	0.00649202	3	AKR1C1,AKR1C2,AKR1C3
GO:0019814	immunoglobulin complex	cellular_component	3/414	7/19098	19.7702	0.000331737	0.00649202	3	IGLL5,JCHAIN,SYK
GO:0043313	regulation of neutrophil degranulation	biological_process	3/414	7/19098	19.7702	0.000331737	0.00649202	3	ITGAM,ITGB2,SYK
GO:0051235	maintenance of location	biological_process	17/414	302/19098	2.59675	0.000341856	0.00665574	17	ABCA1,ABCG1,ACVR1C,ALB,C3,CALM1,CD4,CXCL9,DGAT2,DHRS7C,F2R,F2RL3,FBN1,IL6,LEP,NOS1,TRPM2
GO:0010035	response to inorganic substance	biological_process	24/414	510/19098	2.17084	0.00034204	0.00665574	24	AKR1C3,AQP1,ATP5F1D,AVPR1A,C1QA,CALM1,CEBPA,CYBB,DDX11,FOSL1,GPR37,HSPH1,IL6,LRP11,MT1A,MT1M,NQO1,NR4A3,PDGFD,PGAM2,SDC1,THBS1,TRPM2,TXNRD1
GO:1903530	regulation of secretion by cell	biological_process	29/414	670/19098	1.99669	0.000345502	0.0067041	29	ACVR1C,ADIPOQ,ADORA2A,ARNTL,AVPR1A,CADM1,CCL5,CSF1R,F2R,FCGR2B,GPAM,IL1RL1,IL6,ITGAM,ITGB2,KCNS3,LEP,NSF,RAB37,RASGRP1,RASL10B,SDC1,SFRP1,SLC25A4,SYK,TLR6,TLR8,TRIM9,TRPM2
GO:0070011	peptidase activity, acting on L-amino acid peptides	molecular_function	28/414	638/19098	2.02453	0.000350028	0.00676997	28	ADAM28,ADAMTS15,ADAMTS18,ADAMTS4,ADAMTS8,ADAMTS9,C1QA,C1QB,C1QC,C1S,C2,C3,C4A,C4B,CFB,CMA1,CPVL,CPXM1,CTSL,CTSS,LVRN,MASP1,MMP19,PRSS42,SENP3-EIF4A1,SFRP1,TPSB2,XPNPEP2
GO:0055081	anion homeostasis	biological_process	6/414	44/19098	6.29051	0.000351815	0.00676997	6	ABCA1,ABCG1,DGAT2,GOT1,GPAM,SFRP4
GO:0003013	circulatory system process	biological_process	24/414	511/19098	2.1666	0.000351853	0.00676997	24	ADIPOQ,ADM,ADORA2A,AGTRAP,AVPR1A,C3AR1,CALM1,CMA1,CSRP3,DSC2,ELN,F2R,HDAC4,KCNJ5,LEP,LVRN,MYL3,NOS1,PDE4B,PTGS1,PTP4A3,RASL10B,RENBP,SLC2A5
GO:0010743	regulation of macrophage derived foam cell differentiation	biological_process	5/414	29/19098	7.95352	0.000361189	0.00691088	5	ABCA1,ABCG1,ADIPOQ,IL18,PLA2G2A
GO:0042554	superoxide anion generation	biological_process	5/414	29/19098	7.95352	0.000361189	0.00691088	5	ACP5,CYBB,ITGAM,ITGB2,SYK
GO:0044255	cellular lipid metabolic process	biological_process	41/414	1081/19098	1.74963	0.000363756	0.0069154	41	ABCG1,ACSS1,ADIPOQ,AKR1C1,AKR1C2,AKR1C3,ALDH3A2,AOAH,AVPR1A,BTC,C3,CDS1,CES1,CSF1R,DGAT2,FABP7,FGF9,GPAM,HPGDS,HRASLS5,KLB,LEP,LIPE,NR4A3,PCK1,PDPR,PHOSPHO1,PIK3AP1,PIK3R2,PLA2G2A,PLBD1,PLEK,PPT1,PRKAG3,PRKAR2B,PTGS1,RARRES2,SDC1,SPHK1,TECRL,THRSP
GO:0002768	immune response-regulating cell surface receptor signaling pathway	biological_process	19/414	361/19098	2.42792	0.000364008	0.0069154	19	ARPC5,C3AR1,C5AR1,CALM1,CD209,CD4,CLEC10A,CR1,FCGR2B,GRAP2,HSP90AA1,IGLL5,ITK,MS4A2,NR4A3,PDE4B,PIK3R2,PRKCB,SYK
GO:0004866	endopeptidase inhibitor activity	molecular_function	12/414	171/19098	3.23722	0.000364445	0.0069154	12	C3,C4A,C4B,CST7,NAIP,RENBP,SERPINB1,SERPINB2,SERPINE1,SLPI,TFPI2,WFIKKN1
GO:0001101	response to acid chemical	biological_process	18/414	333/19098	2.49354	0.000376383	0.00712225	18	ABCA1,ADIPOQ,AKR1C1,AKR1C2,AKR1C3,AQP1,AVPR1A,CYBB,DGAT2,FOLR2,LEP,LRP11,NAIP,NQO1,PCK1,PDGFD,PTGFR,SFRP1
GO:0050670	regulation of lymphocyte proliferation	biological_process	13/414	197/19098	3.04414	0.00038127	0.0071949	13	CCL5,CD209,CD4,FCGR2B,GPAM,HLA-DMB,IL18,IL6,LEP,LMO1,PNP,PRKAR1A,SYK
GO:0006941	striated muscle contraction	biological_process	12/414	172/19098	3.2184	0.000384281	0.00723186	12	ACTN3,CALM1,CHRNA1,CSRP3,DSC2,HDAC4,KCNJ5,MYL3,MYOM3,NOS1,PDE4B,PGAM2
GO:0042981	regulation of apoptotic process	biological_process	52/414	1482/19098	1.61861	0.000389238	0.00730513	52	ACTN3,ACVR1C,ADIPOQ,ADM,ADORA2A,AKR1C3,ALB,AQP1,BTC,C5AR1,CCL2,CCL5,CD248,CHL1,CIDEC,CITED2,CSF1R,ERCC5,F2R,FOSL1,GPAM,HDAC4,HHIP,HSPA1B,HSPH1,IER3,IL31RA,IL6,LEP,MAP3K14,MDM4,MPV17L,NAIP,NQO1,NR4A3,PPT1,PTGFR,RFFL,S100B,SERPINB2,SERPINE1,SFRP1,SFRP4,SPHK1,STEAP3,TDGF1,TGM2,THBS1,TNFAIP8L2,TOP2A,VNN1,ZNF385A
GO:0032944	regulation of mononuclear cell proliferation	biological_process	13/414	198/19098	3.02877	0.000400221	0.00749078	13	CCL5,CD209,CD4,FCGR2B,GPAM,HLA-DMB,IL18,IL6,LEP,LMO1,PNP,PRKAR1A,SYK
GO:0030154	cell differentiation	biological_process	116/414	4020/19098	1.33113	0.000403545	0.00753248	116	ABCA1,ABCB5,ABCG1,ACTN3,ACVR1C,ADAMTS9,ADGRV1,ADIPOQ,ADM,ADORA2A,AKR1C1,AKR1C2,AKR1C3,ALPL,ARC,ARNTL,AVPR1A,BLNK,BTC,C1QC,CADM1,CCL2,CD4,CD53,CEBPA,CES1,CHL1,CHODL,CITED2,CLDN5,COL11A1,COL11A2,CR1,CSF1R,CSF3,CSRP3,CTSL,CXCL14,CXCL9,DLK1,DOCK2,DSC2,DTX1,E2F8,EFEMP1,EGFL6,EPB42,FABP7,FBN1,FCGR2B,FGF9,GRAP2,HDAC4,HHIP,HIST1H3B,HIST1H3C,HIST1H3F,HIST1H3I,HSP90AA1,HSPA1B,IL18,IL31RA,IL6,IL7R,IRX3,ITGA…
GO:0008643	carbohydrate transport	biological_process	11/414	149/19098	3.4056	0.000413439	0.00768647	11	ADIPOQ,AQP1,C3,LEP,NR4A3,PIK3R2,PRKCB,RARRES2,SLC2A5,SLC37A2,TUSC5
GO:0010888	negative regulation of lipid storage	biological_process	4/414	17/19098	10.8542	0.000414033	0.00768647	4	ABCA1,ABCG1,IL6,LEP
GO:0044262	cellular carbohydrate metabolic process	biological_process	15/414	252/19098	2.74586	0.000421376	0.00780171	15	ACTN3,ADIPOQ,AOAH,CALM1,DGAT2,GOT1,HDAC4,LEP,PCK1,PGAM2,PLEK,PPP1R3A,PPP1R3C,PRKAG3,RPE
GO:1901661	quinone metabolic process	biological_process	5/414	30/19098	7.68841	0.000425782	0.00786208	5	AKR1C1,AKR1C2,AKR1C3,COQ10A,FDXR
GO:0070301	cellular response to hydrogen peroxide	biological_process	8/414	83/19098	4.44631	0.000434991	0.00801059	8	AQP1,GPR37,HSPH1,IL6,NQO1,NR4A3,PDGFD,TRPM2
GO:1901698	response to nitrogen compound	biological_process	40/414	1056/19098	1.74736	0.000440604	0.00809227	40	ABCA1,ACVR1C,ADIPOQ,ADM,ADORA2A,AGTRAP,AQP1,AVPR1A,C5AR1,CISH,CYBB,DDX11,FBN1,FCGR2B,FOLR2,FOSL1,GOT1,IL6,ITGB2,KLF1,LEP,MMP19,NAIP,NQO1,NR4A3,PCK1,PDE4B,PDGFD,PIK3R2,PPP1R1B,PRKAR1A,PRKAR2B,PRKCB,RARRES2,SDC1,SFRP1,SYK,TLR6,TRPM2,TUSC5
GO:0065009	regulation of molecular function	biological_process	98/414	3289/19098	1.37452	0.000449185	0.00822318	98	ACVR1C,ADA2,ADIPOQ,ADM,ADORA2A,AQP1,ARC,ARHGAP20,ARHGAP36,AVPR1A,BTC,C3,C4A,C4B,C5AR1,CALM1,CCL2,CCL5,CD4,CEBPA,CISH,CR1,CSF1R,CSF3,CST7,CTSS,CXCL14,CXCL3,CXCL9,DCUN1D4,DDX11,DNAJB1,DOCK2,DUSP2,EFEMP1,F2R,FBN1,FCGR2B,FGF9,FOSL1,GPRC5A,GRN,GRPEL2,HDAC4,HPCAL4,HSP90AA1,HSPA1B,HSPH1,IL18,IL6,ITGAM,ITGB2,ITK,KCNS3,KLB,LEP,MAP3K14,MMD,MYL3,NAIP,NCAM1,NOS1,NQO1,NRBF2,OPRD1,PALM,PDE4B,PDGFD,PIK3R2,PLEK,…
GO:0032757	positive regulation of interleukin-8 production	biological_process	6/414	46/19098	6.01701	0.000450126	0.00822318	6	ADIPOQ,F2R,HSPA1B,SERPINE1,TLR7,TLR8
GO:0042542	response to hydrogen peroxide	biological_process	10/414	127/19098	3.63232	0.000451473	0.00822591	10	AQP1,FOSL1,GPR37,HSPH1,IL6,NQO1,NR4A3,PDGFD,SDC1,TRPM2
GO:0019915	lipid storage	biological_process	7/414	64/19098	5.04552	0.000458303	0.00830629	7	ABCA1,ABCG1,ACVR1C,C3,DGAT2,IL6,LEP
GO:0032677	regulation of interleukin-8 production	biological_process	7/414	64/19098	5.04552	0.000458303	0.00830629	7	ADIPOQ,F2R,HSPA1B,SERPINE1,TLR6,TLR7,TLR8
GO:0001970	positive regulation of activation of membrane attack complex	biological_process	2/414	2/19098	46.1304	0.000468811	0.00832108	2	C3,C6
GO:0002605	negative regulation of dendritic cell antigen processing and presentation	biological_process	2/414	2/19098	46.1304	0.000468811	0.00832108	2	FCGR2B,THBS1
GO:0005592	collagen type XI trimer	cellular_component	2/414	2/19098	46.1304	0.000468811	0.00832108	2	COL11A1,COL11A2
GO:0005602	complement component C1 complex	cellular_component	2/414	2/19098	46.1304	0.000468811	0.00832108	2	C1QA,C1QB
GO:0031750	D3 dopamine receptor binding	molecular_function	2/414	2/19098	46.1304	0.000468811	0.00832108	2	PALM,PPP1R1B
GO:0034688	integrin alphaM-beta2 complex	cellular_component	2/414	2/19098	46.1304	0.000468811	0.00832108	2	ITGAM,ITGB2
GO:0061402	positive regulation of transcription from RNA polymerase II promoter in response to acidic pH	biological_process	2/414	2/19098	46.1304	0.000468811	0.00832108	2	PCK1,SLC38A3
GO:2000485	regulation of glutamine transport	biological_process	2/414	2/19098	46.1304	0.000468811	0.00832108	2	LEP,SLC38A3
GO:0044070	regulation of anion transport	biological_process	8/414	84/19098	4.39337	0.000471844	0.00835335	8	ADORA2A,AVPR1A,GABRE,LEP,SFRP4,SLC38A3,SYK,THBS1
GO:0010876	lipid localization	biological_process	19/414	369/19098	2.37528	0.00047659	0.00840751	19	ABCA1,ABCG1,ACVR1C,ADIPOQ,AKR1C1,ALB,C3,CES1,DGAT2,IL6,LEP,OSBP2,OSBPL3,OSBPL6,PLA2G2A,PLTP,SYK,THBS1,THRSP
GO:0030100	regulation of endocytosis	biological_process	14/414	228/19098	2.83257	0.000477351	0.00840751	14	ADIPOQ,C2,C3,C4A,C4B,CCL2,DOCK2,FCGR2B,PPT1,SELE,SERPINE1,SFRP4,STON2,SYK
GO:0050671	positive regulation of lymphocyte proliferation	biological_process	10/414	128/19098	3.60394	0.000480473	0.00844085	10	CCL5,CD209,CD4,GPAM,HLA-DMB,IL18,IL6,LEP,PNP,SYK
GO:1901214	regulation of neuron death	biological_process	16/414	283/19098	2.60808	0.000483243	0.00846785	16	ADORA2A,C5AR1,CCL2,CCL5,CHL1,CSF3,F2R,FCGR2B,HDAC4,ITGAM,NAIP,NQO1,NR4A3,PPT1,TLR6,TRPM2
GO:0019538	protein metabolic process	biological_process	157/414	5787/19098	1.25151	0.000487926	0.00852816	157	ABCA1,ABCG1,AC004556.1,ACVR1C,ADA2,ADAM28,ADAMTS15,ADAMTS18,ADAMTS4,ADAMTS8,ADAMTS9,ADIPOQ,ADORA2A,ALB,ALPL,AQP1,ARNTL,ASB12,ASB14,ASB18,BTC,C1QA,C1QB,C1QC,C1S,C2,C3,C3AR1,C4A,C4B,C5AR1,C6,CALM1,CCL2,CCL5,CD4,CEBPA,CFB,CISH,CLEC3B,CMA1,COL11A1,CP,CPVL,CPXM1,CR1,CSF1R,CSF3,CST7,CTSL,CTSS,CYBB,DCUN1D4,DGAT2,DTX1,DUSP2,EFEMP1,EPB42,EXTL1,F13A1,F2R,FBN1,FBXO30,FCGR2B,FGF9,FOLR2,GALNT8,GALNTL6,GPR37,G…
GO:0051174	regulation of phosphorus metabolic process	biological_process	58/414	1722/19098	1.55375	0.000496342	0.00862888	58	ACTN3,ADIPOQ,ADM,ADORA2A,C3,C5AR1,CALM1,CCL2,CCL5,CD4,CEBPA,CISH,CSF1R,CSF3,CXCL9,DUSP2,F2R,FCGR2B,FGF9,GPR37,GPRC5A,HDAC4,HSP90AA1,HSPH1,IL18,IL31RA,IL6,ITGB2,KLB,LEP,MAP3K14,MMD,NOS1,NRBF2,OPRD1,PALM,PDGFD,PDPR,PGAM2,PIK3R2,PLA2G2A,PLEK,PPP1R1B,PPP1R3C,PRKAR1A,PRKAR2B,RARRES2,RASGRP1,RCAN2,SFRP1,SPHK1,SYK,TDGF1,THBS1,THBS4,TLR6,TLR7,TLR8
GO:0046651	lymphocyte proliferation	biological_process	15/414	256/19098	2.70296	0.000496912	0.00862888	15	CCL5,CD209,CD4,DOCK2,FCGR2B,GPAM,HLA-DMB,IL18,IL6,IL7R,LEP,LMO1,PNP,PRKAR1A,SYK
GO:0061135	endopeptidase regulator activity	molecular_function	12/414	177/19098	3.12749	0.000497706	0.00862888	12	C3,C4A,C4B,CST7,NAIP,RENBP,SERPINB1,SERPINB2,SERPINE1,SLPI,TFPI2,WFIKKN1
GO:0061900	glial cell activation	biological_process	5/414	31/19098	7.44039	0.000498714	0.00862888	5	ADORA2A,ITGAM,TLR6,TLR7,TLR8
GO:0008610	lipid biosynthetic process	biological_process	29/414	686/19098	1.95012	0.00050569	0.00872761	29	ABCG1,ACSS1,ADIPOQ,ADM,AKR1C3,ALDH3A2,AVPR1A,C3,CDS1,CES1,CH25H,DGAT2,FDXR,FGF9,GPAM,HPGDS,KLB,LEP,OSBPL3,OSBPL6,PCK1,PHOSPHO1,PIK3R2,PLA2G2A,PRKAG3,PTGS1,SPHK1,TECRL,THRSP
GO:0032946	positive regulation of mononuclear cell proliferation	biological_process	10/414	129/19098	3.576	0.000511002	0.00875652	10	CCL5,CD209,CD4,GPAM,HLA-DMB,IL18,IL6,LEP,PNP,SYK
GO:0001909	leukocyte mediated cytotoxicity	biological_process	8/414	85/19098	4.34169	0.00051119	0.00875652	8	CADM1,FCGR2B,IL18,IL7R,LEP,RAET1E,RASGRP1,SH2D1A
GO:2000379	positive regulation of reactive oxygen species metabolic process	biological_process	8/414	85/19098	4.34169	0.00051119	0.00875652	8	AKR1C3,HDAC4,HSP90AA1,ITGAM,ITGB2,LEP,THBS1,TLR6
GO:0043491	protein kinase B signaling	biological_process	14/414	230/19098	2.80794	0.000520721	0.00878808	14	AKR1C2,AKR1C3,BTC,CCL2,CCL5,CSF3,FGF9,HSP90AA1,IL18,KLB,LEP,PIK3AP1,PIK3R2,THBS1
GO:0030638	polyketide metabolic process	biological_process	3/414	8/19098	17.2989	0.000522246	0.00878808	3	AKR1C1,AKR1C2,AKR1C3
GO:0044597	daunorubicin metabolic process	biological_process	3/414	8/19098	17.2989	0.000522246	0.00878808	3	AKR1C1,AKR1C2,AKR1C3
GO:0044598	doxorubicin metabolic process	biological_process	3/414	8/19098	17.2989	0.000522246	0.00878808	3	AKR1C1,AKR1C2,AKR1C3
GO:0060155	platelet dense granule organization	biological_process	3/414	8/19098	17.2989	0.000522246	0.00878808	3	ABCA1,F2R,F2RL3
GO:2000501	regulation of natural killer cell chemotaxis	biological_process	3/414	8/19098	17.2989	0.000522246	0.00878808	3	CCL2,CCL5,CXCL14
GO:0006071	glycerol metabolic process	biological_process	4/414	18/19098	10.2512	0.000523268	0.00878808	4	DGAT2,GOT1,LEP,PCK1
GO:0032928	regulation of superoxide anion generation	biological_process	4/414	18/19098	10.2512	0.000523268	0.00878808	4	ACP5,ITGAM,ITGB2,SYK
GO:0032943	mononuclear cell proliferation	biological_process	15/414	258/19098	2.682	0.000538834	0.00898013	15	CCL5,CD209,CD4,DOCK2,FCGR2B,GPAM,HLA-DMB,IL18,IL6,IL7R,LEP,LMO1,PNP,PRKAR1A,SYK
GO:0010562	positive regulation of phosphorus metabolic process	biological_process	40/414	1067/19098	1.72935	0.000539932	0.00898013	40	ACTN3,ADIPOQ,ADM,C3,C5AR1,CALM1,CCL2,CCL5,CD4,CSF1R,CSF3,CXCL9,F2R,FCGR2B,FGF9,GPR37,HSP90AA1,HSPH1,IL18,IL31RA,IL6,KLB,LEP,MAP3K14,MMD,NOS1,OPRD1,PDGFD,PLA2G2A,PLEK,PRKAR1A,PRKAR2B,RARRES2,RASGRP1,SPHK1,SYK,TDGF1,THBS1,THBS4,TLR6
GO:0045937	positive regulation of phosphate metabolic process	biological_process	40/414	1067/19098	1.72935	0.000539932	0.00898013	40	ACTN3,ADIPOQ,ADM,C3,C5AR1,CALM1,CCL2,CCL5,CD4,CSF1R,CSF3,CXCL9,F2R,FCGR2B,FGF9,GPR37,HSP90AA1,HSPH1,IL18,IL31RA,IL6,KLB,LEP,MAP3K14,MMD,NOS1,OPRD1,PDGFD,PLA2G2A,PLEK,PRKAR1A,PRKAR2B,RARRES2,RASGRP1,SPHK1,SYK,TDGF1,THBS1,THBS4,TLR6
GO:0046914	transition metal ion binding	molecular_function	40/414	1067/19098	1.72935	0.000539932	0.00898013	40	ACP5,ADA2,ADAMTS15,ADAMTS8,ADAMTS9,ALB,CD4,CH25H,CP,CPXM1,CSRP1,DTX1,FBXO30,HBD,HBM,HDAC4,HHIP,LMCD1,LOXL1,LVRN,MARCH1,MDM4,MMP19,MT1A,MT1M,NOS1,NR4A3,PCK1,PRKCB,RASGRP1,RXRG,S100B,SNAI3,TRIM14,TRIM9,TTF2,ZFAND2A,ZNF117,ZNF331,ZNF385A
GO:0030414	peptidase inhibitor activity	molecular_function	12/414	179/19098	3.09254	0.000550369	0.00913161	12	C3,C4A,C4B,CST7,NAIP,RENBP,SERPINB1,SERPINB2,SERPINE1,SLPI,TFPI2,WFIKKN1
GO:0014068	positive regulation of phosphatidylinositol 3-kinase signaling	biological_process	7/414	66/19098	4.89262	0.000553665	0.00916416	7	CCL5,CSF3,F2R,IL18,LEP,PDGFD,PIK3AP1
GO:0070663	regulation of leukocyte proliferation	biological_process	13/414	205/19098	2.92534	0.00055666	0.00919158	13	CCL5,CD209,CD4,FCGR2B,GPAM,HLA-DMB,IL18,IL6,LEP,LMO1,PNP,PRKAR1A,SYK
GO:0002683	negative regulation of immune system process	biological_process	20/414	404/19098	2.28368	0.000561394	0.00924752	20	ADIPOQ,ADORA2A,C1QC,CCL2,CR1,DTX1,FBN1,FCGR2B,GPAM,IL1RL1,IL31RA,IL7R,PRKAR1A,SFRP1,THBS1,TIGIT,TLR6,TMEM176A,TMEM176B,TNFAIP8L2
GO:0051046	regulation of secretion	biological_process	30/414	724/19098	1.91148	0.000563384	0.0092581	30	ACVR1C,ADIPOQ,ADORA2A,AQP1,ARNTL,AVPR1A,CADM1,CCL5,CSF1R,F2R,FCGR2B,GPAM,IL1RL1,IL6,ITGAM,ITGB2,KCNS3,LEP,NSF,RAB37,RASGRP1,RASL10B,SDC1,SFRP1,SLC25A4,SYK,TLR6,TLR8,TRIM9,TRPM2
GO:0019432	triglyceride biosynthetic process	biological_process	5/414	32/19098	7.20788	0.000580654	0.0094739	5	C3,DGAT2,GPAM,PCK1,THRSP
GO:0030851	granulocyte differentiation	biological_process	5/414	32/19098	7.20788	0.000580654	0.0094739	5	ADIPOQ,C1QC,CEBPA,CITED2,CSF3
GO:1904037	positive regulation of epithelial cell apoptotic process	biological_process	5/414	32/19098	7.20788	0.000580654	0.0094739	5	AKR1C3,CD248,IL6,SFRP4,THBS1
GO:0035295	tube development	biological_process	37/414	966/19098	1.7669	0.000589108	0.00958906	37	ADAMTS9,ADM,AQP1,C3,C3AR1,C5AR1,C6,CCL2,CEBPA,CITED2,CMA1,CSF1R,CYBB,E2F2,E2F8,FGF9,HHIP,IL18,IL6,IRX3,ITGB2,LEP,MMP19,NR4A3,PRKCB,RARRES2,SDC1,SERPINE1,SFRP1,SPHK1,SYK,TDGF1,TGM2,THBS1,THBS4,TMEM107,TNMD
GO:0016477	cell migration	biological_process	46/414	1289/19098	1.64624	0.00060133	0.00976486	46	ACVR1C,ADAMTS9,ADIPOQ,ARC,ARPC5,C3AR1,C5AR1,C5orf30,CCL2,CCL5,CD248,CH25H,CHL1,CITED2,CSF1R,CXCL14,CXCL3,CXCL9,F2R,GRAP2,HDAC4,IL6,ITGA2B,ITGAM,ITGB2,JCHAIN,LEP,PDE4B,PDGFD,PIK3R2,PTP4A3,RARRES2,RFFL,SDC1,SELE,SELPLG,SERPINE1,SFRP1,SIRPA,SLC7A10,SPHK1,SYK,TDGF1,THBS1,THBS4,TRPM2
GO:0031341	regulation of cell killing	biological_process	7/414	67/19098	4.8196	0.000606922	0.00982587	7	CADM1,FCGR2B,IL7R,LEP,RAET1E,RASGRP1,SH2D1A
GO:0008201	heparin binding	molecular_function	11/414	156/19098	3.25279	0.000609379	0.00982587	11	ADA2,ADAMTS15,ADAMTS8,CCDC80,CLEC3B,FBN1,FGF9,SFRP1,THBS1,THBS4,WISP1
GO:0009408	response to heat	biological_process	11/414	156/19098	3.25279	0.000609379	0.00982587	11	DNAJB1,HSP90AA1,HSPA1B,HSPA6,HSPH1,LRP11,NOS1,TFEC,THBS1,TRPM2,TRPV3
GO:1904659	glucose transmembrane transport	biological_process	9/414	109/19098	3.80893	0.000611678	0.00983984	9	ADIPOQ,C3,LEP,NR4A3,PIK3R2,PRKCB,RARRES2,SLC2A5,TUSC5
GO:0046983	protein dimerization activity	molecular_function	46/414	1292/19098	1.64241	0.000631609	0.0101234	46	ABCG1,ACTN3,ADA2,ADIPOQ,ADORA2A,ADSSL1,ARNTL,C1QB,CADM1,CCL5,CD4,CEBPA,CSF1R,CYBB,DGAT2,E2F2,E2F8,ERCC5,GRPEL2,HIST1H2AJ,HIST1H2BH,HIST1H3B,HIST1H3C,HIST1H3F,HIST1H3I,HPGDS,HSP90AA1,ITGAM,ITGB2,JCHAIN,MASP1,MYOM3,NR4A3,PIK3R2,PLEK,RASGRP1,RENBP,RPE,S100B,SLC4A1,TFEC,THRSP,TIGIT,TLR6,TOP2A,TRIM9
GO:1901653	cellular response to peptide	biological_process	18/414	348/19098	2.38606	0.00063225	0.0101234	18	ADIPOQ,AGTRAP,CISH,DDX11,FBN1,FCGR2B,GOT1,KLF1,LEP,NR4A3,PCK1,PIK3R2,PRKAR1A,PRKAR2B,PRKCB,RARRES2,TLR6,TUSC5
GO:2000377	regulation of reactive oxygen species metabolic process	biological_process	11/414	157/19098	3.23207	0.000642833	0.0102627	11	ACP5,AKR1C3,HDAC4,HSP90AA1,ITGAM,ITGB2,LEP,MPV17L,SYK,THBS1,TLR6
GO:0050848	regulation of calcium-mediated signaling	biological_process	8/414	88/19098	4.19368	0.000645431	0.0102627	8	ACTN3,CALM1,CD4,LMCD1,NOS1,PLEK,RCAN2,SYK
GO:1902106	negative regulation of leukocyte differentiation	biological_process	8/414	88/19098	4.19368	0.000645431	0.0102627	8	ADIPOQ,C1QC,DTX1,FBN1,FCGR2B,SFRP1,TMEM176A,TMEM176B
GO:0008203	cholesterol metabolic process	biological_process	10/414	133/19098	3.46845	0.000649668	0.0102646	10	ABCA1,ABCG1,CEBPA,CES1,CH25H,DGAT2,FDXR,GPAM,LEP,LIPE
GO:0070665	positive regulation of leukocyte proliferation	biological_process	10/414	133/19098	3.46845	0.000649668	0.0102646	10	CCL5,CD209,CD4,GPAM,HLA-DMB,IL18,IL6,LEP,PNP,SYK
GO:0032373	positive regulation of sterol transport	biological_process	4/414	19/19098	9.71167	0.000651532	0.0102646	4	ABCA1,ABCG1,ADIPOQ,PLTP
GO:0032376	positive regulation of cholesterol transport	biological_process	4/414	19/19098	9.71167	0.000651532	0.0102646	4	ABCA1,ABCG1,ADIPOQ,PLTP
GO:0032611	interleukin-1 beta production	biological_process	7/414	68/19098	4.74872	0.000664167	0.0104397	7	ABCA1,ACP5,CMA1,F2R,SPHK1,TLR6,TLR8
GO:0051094	positive regulation of developmental process	biological_process	45/414	1259/19098	1.64882	0.000668416	0.0104808	45	ACTN3,ADAMTS9,ADIPOQ,ADM,AQP1,ARNTL,BTC,C3,C3AR1,C5AR1,C6,CD4,CD53,CEBPA,CITED2,CLDN5,CMA1,CSF3,CXCL9,CYBB,FGF9,GPAM,HSPA1B,IL18,IL6,IL7R,IRX3,ITGB2,LEP,MMD,PDGFD,PLA2G2A,PNP,PRKCB,RARRES2,RASGRP1,S100B,SERPINE1,SFRP1,SFRP4,SPHK1,SYK,THBS1,VNN1,ZNF385A
GO:0034764	positive regulation of transmembrane transport	biological_process	12/414	183/19098	3.02495	0.000669833	0.0104808	12	ADIPOQ,ARC,C3,CALM1,CTSS,CXCL9,F2R,F2RL3,NOS1,NR4A3,PIK3R2,RARRES2
GO:0042269	regulation of natural killer cell mediated cytotoxicity	biological_process	5/414	33/19098	6.98946	0.000672291	0.0104954	5	CADM1,LEP,RAET1E,RASGRP1,SH2D1A
GO:0008233	peptidase activity	molecular_function	28/414	666/19098	1.93942	0.000685445	0.0106765	28	ADAM28,ADAMTS15,ADAMTS18,ADAMTS4,ADAMTS8,ADAMTS9,C1QA,C1QB,C1QC,C1S,C2,C3,C4A,C4B,CFB,CMA1,CPVL,CPXM1,CTSL,CTSS,LVRN,MASP1,MMP19,PRSS42,SENP3-EIF4A1,SFRP1,TPSB2,XPNPEP2
GO:0019220	regulation of phosphate metabolic process	biological_process	57/414	1708/19098	1.53948	0.000696604	0.0108236	57	ACTN3,ADIPOQ,ADM,ADORA2A,C3,C5AR1,CALM1,CCL2,CCL5,CD4,CEBPA,CISH,CSF1R,CSF3,CXCL9,DUSP2,F2R,FCGR2B,FGF9,GPR37,GPRC5A,HDAC4,HSP90AA1,HSPH1,IL18,IL31RA,IL6,ITGB2,KLB,LEP,MAP3K14,MMD,NOS1,NRBF2,OPRD1,PALM,PDGFD,PGAM2,PIK3R2,PLA2G2A,PLEK,PPP1R1B,PPP1R3C,PRKAR1A,PRKAR2B,RARRES2,RASGRP1,RCAN2,SFRP1,SPHK1,SYK,TDGF1,THBS1,THBS4,TLR6,TLR7,TLR8
GO:0050729	positive regulation of inflammatory response	biological_process	9/414	111/19098	3.74031	0.000698043	0.0108236	9	C3,IL18,IL1RL1,IL6,PLA2G2A,SERPINE1,TGM2,TLR6,TLR7
GO:0008219	cell death	biological_process	68/414	2132/19098	1.47133	0.000708144	0.0109555	68	ACTN3,ACVR1C,ADIPOQ,ADM,ADORA2A,AKR1C3,ALB,AQP1,BTC,C5AR1,CADM1,CCL2,CCL5,CD248,CD5,CHL1,CIDEC,CITED2,CSF1R,CSF3,CTSL,DSC2,E2F2,ERCC5,F2R,FCGR2B,FOSL1,GPAM,GPR37,HDAC4,HHIP,HSPA1B,HSPH1,IER3,IL31RA,IL6,ITGAM,ITGB2,KRT31,LEP,MAP3K14,MDM4,MPV17L,NAIP,NQO1,NR4A3,PPT1,PRKCB,PTGFR,RFFL,S100B,SERPINB2,SERPINE1,SFRP1,SFRP4,SLC25A4,SPHK1,STEAP3,TDGF1,TGM2,THBS1,TLR6,TNFAIP8L2,TOP2A,TRPM2,VNN1,WISP1,ZNF38…
GO:0045123	cellular extravasation	biological_process	6/414	50/19098	5.53565	0.000710022	0.0109599	6	CCL2,ITGB2,LEP,PDGFD,SELE,SELPLG
GO:0050794	regulation of cellular process	biological_process	262/414	10602/19098	1.13999	0.000714236	0.0110002	262	ABCA1,ABCG1,AC067968.1,ACKR4,ACP5,ACTN3,ACVR1C,ADA2,ADAMTS18,ADAMTS8,ADAMTS9,ADGRV1,ADIPOQ,ADM,ADORA2A,AGTRAP,AKR1C2,AKR1C3,ALB,AQP1,ARC,ARHGAP20,ARHGAP36,ARNTL,ARPC5,ASB14,ASB18,AVPR1A,BLNK,BTC,C1QC,C2,C3,C3AR1,C4A,C4B,C5AR1,C5orf30,C6,CADM1,CALM1,CCL2,CCL5,CD209,CD248,CD4,CD5,CD53,CD82,CDS1,CEBPA,CHL1,CHMP1B,CHODL,CHRNA1,CIDEC,CIPC,CISH,CITED2,CLDN5,CLEC10A,CLEC3B,CR1,CREB5,CREG1,CSF1R,CSF3,CSR…
GO:0051247	positive regulation of protein metabolic process	biological_process	53/414	1560/19098	1.56725	0.000725047	0.0111417	53	ACVR1C,ADIPOQ,ARNTL,C3,C5AR1,C6,CALM1,CCL2,CCL5,CD4,CEBPA,CLEC3B,CR1,CSF1R,CSF3,CYBB,DCUN1D4,F2R,FCGR2B,FGF9,GPR37,HDAC4,HIST1H1B,HSP90AA1,HSPH1,IL18,IL31RA,IL6,KLB,LEP,LONRF3,MAP3K14,MMD,NOS1,NSF,OPRD1,PDGFD,PLA2G2A,PRKAR1A,PRKAR2B,PRR16,PYHIN1,RARRES2,RASGRP1,SPHK1,SYK,TDGF1,THBS1,THBS4,TLR6,TLR7,TLR8,ZFAND2A
GO:0071236	cellular response to antibiotic	biological_process	10/414	135/19098	3.41707	0.000729857	0.0111906	10	AQP1,CYBB,DDX11,GPR37,HSPH1,IL6,NQO1,NR4A3,PDGFD,TRPM2
GO:0072359	circulatory system development	biological_process	37/414	978/19098	1.74522	0.000738895	0.0113039	37	ADAMTS9,ADM,AQP1,C3,C3AR1,C5AR1,C6,CCL2,CITED2,CLDN5,CMA1,COL11A1,CSRP3,CYBB,E2F2,E2F8,FBN1,FGF9,FOSL1,IL18,IL6,ITGB2,LEP,LOXL1,MMP19,MYL3,PDGFD,PRKAR1A,PRKCB,SERPINE1,SFRP1,SPHK1,SYK,TDGF1,THBS1,THBS4,TNMD
GO:0043169	cation binding	molecular_function	119/414	4209/19098	1.30423	0.000741626	0.0113205	119	AC067968.1,ACP5,ACSS1,ACTN3,ACVR1C,ADA2,ADAM28,ADAMTS15,ADAMTS18,ADAMTS4,ADAMTS8,ADAMTS9,ADGRV1,ADSSL1,ALB,ALPL,C1S,C2,CA14,CALM1,CALML6,CD209,CD248,CD4,CH25H,CHRNA1,CLEC3B,COL11A1,COL11A2,CP,CPXM1,CREB5,CSRP1,CSRP3,CYB561D2,CYBB,DDX11,DLK1,DSC2,DTX1,EFEMP1,EGFL6,ERCC5,F13A1,FAT3,FBN1,FBXO30,FRAS1,GALNT8,GALNTL6,HBD,HBM,HDAC4,HHIP,HPCAL4,HPGDS,ITGA2B,ITGAM,ITGB2,ITK,JCHAIN,KLF1,LMCD1,LMO1,LONRF3,…
GO:0035579	specific granule membrane	cellular_component	8/414	90/19098	4.10048	0.000749745	0.0114191	8	C3AR1,CD53,CYBB,ITGAM,ITGB2,RAB37,SLC2A5,TRPM2
GO:0003810	protein-glutamine gamma-glutamyltransferase activity	molecular_function	3/414	9/19098	15.3768	0.000770791	0.0115628	3	EPB42,F13A1,TGM2
GO:0004862	cAMP-dependent protein kinase inhibitor activity	molecular_function	3/414	9/19098	15.3768	0.000770791	0.0115628	3	PPP1R1B,PRKAR1A,PRKAR2B
GO:0030647	aminoglycoside antibiotic metabolic process	biological_process	3/414	9/19098	15.3768	0.000770791	0.0115628	3	AKR1C1,AKR1C2,AKR1C3
GO:0055091	phospholipid homeostasis	biological_process	3/414	9/19098	15.3768	0.000770791	0.0115628	3	ABCA1,ABCG1,GPAM
GO:0006692	prostanoid metabolic process	biological_process	5/414	34/19098	6.78389	0.000774331	0.0115628	5	AKR1C2,AKR1C3,AVPR1A,HPGDS,PTGS1
GO:0006693	prostaglandin metabolic process	biological_process	5/414	34/19098	6.78389	0.000774331	0.0115628	5	AKR1C2,AKR1C3,AVPR1A,HPGDS,PTGS1
GO:0016709	oxidoreductase activity, acting on paired donors, with incorporation or reduction of molecular oxygen, NAD(P)H as one donor, and incorporation of one atom of oxygen	molecular_function	5/414	34/19098	6.78389	0.000774331	0.0115628	5	AKR1C1,AKR1C2,AKR1C3,FMO3,NOS1
GO:0046460	neutral lipid biosynthetic process	biological_process	5/414	34/19098	6.78389	0.000774331	0.0115628	5	C3,DGAT2,GPAM,PCK1,THRSP
GO:0046463	acylglycerol biosynthetic process	biological_process	5/414	34/19098	6.78389	0.000774331	0.0115628	5	C3,DGAT2,GPAM,PCK1,THRSP
GO:0032890	regulation of organic acid transport	biological_process	6/414	51/19098	5.42711	0.000790195	0.0117674	6	ADORA2A,AVPR1A,LEP,SLC38A3,SYK,THBS1
GO:0034103	regulation of tissue remodeling	biological_process	7/414	70/19098	4.61304	0.000791462	0.0117674	7	CSF1R,IL18,IL6,LEP,SFRP1,SYK,THBS4
GO:0010874	regulation of cholesterol efflux	biological_process	4/414	20/19098	9.22609	0.000800573	0.0118261	4	ABCA1,ABCG1,ADIPOQ,PLTP
GO:0036019	endolysosome	cellular_component	4/414	20/19098	9.22609	0.000800573	0.0118261	4	CTSL,CTSS,TLR7,TLR8
GO:0045954	positive regulation of natural killer cell mediated cytotoxicity	biological_process	4/414	20/19098	9.22609	0.000800573	0.0118261	4	CADM1,RAET1E,RASGRP1,SH2D1A
GO:0005604	basement membrane	cellular_component	8/414	91/19098	4.05542	0.000806762	0.011892	8	CCDC80,EGFL6,FBN1,FGF9,FRAS1,LOXL1,SMOC1,THBS4
GO:0030098	lymphocyte differentiation	biological_process	17/414	326/19098	2.40557	0.000810716	0.0119246	17	BLNK,CD4,CR1,DOCK2,DTX1,FCGR2B,HDAC4,IL18,IL6,IL7R,ITK,LEP,PNP,RASGRP1,SFRP1,SYK,VNN1
GO:0031674	I band	cellular_component	10/414	137/19098	3.36719	0.00081803	0.0120065	10	ACTN3,CSRP3,HDAC4,IGFN1,MYL3,MYOM3,MYOZ3,NOS1,PDE4B,SLC4A1
GO:0005539	glycosaminoglycan binding	molecular_function	13/414	214/19098	2.80232	0.000831152	0.0121731	13	ADA2,ADAMTS15,ADAMTS8,CCDC80,CLEC3B,FBN1,FGF9,JCHAIN,LYVE1,SFRP1,THBS1,THBS4,WISP1
GO:0006935	chemotaxis	biological_process	25/414	576/19098	2.00219	0.000841235	0.0122946	25	ACKR4,C3AR1,C5AR1,CCL2,CCL5,CH25H,CHL1,CSF1R,CXCL14,CXCL3,CXCL9,DOCK2,FOSL1,IL6,ITGB2,NCAM1,NR4A3,PDE4B,PDGFD,RARRES2,SERPINE1,SYK,THBS1,THBS4,TRPM2
GO:0010469	regulation of signaling receptor activity	biological_process	24/414	544/19098	2.03517	0.000849937	0.0123954	24	ADA2,ADIPOQ,ADM,ARC,BTC,CCL2,CCL5,CSF3,CXCL14,CXCL3,CXCL9,EFEMP1,FBN1,FCGR2B,FGF9,GPRC5A,GRN,IL18,IL6,LEP,PDGFD,SERPINE1,TDGF1,THBS4
GO:0042330	taxis	biological_process	25/414	577/19098	1.99872	0.000862081	0.0125458	25	ACKR4,C3AR1,C5AR1,CCL2,CCL5,CH25H,CHL1,CSF1R,CXCL14,CXCL3,CXCL9,DOCK2,FOSL1,IL6,ITGB2,NCAM1,NR4A3,PDE4B,PDGFD,RARRES2,SERPINE1,SYK,THBS1,THBS4,TRPM2
GO:1902652	secondary alcohol metabolic process	biological_process	10/414	138/19098	3.34279	0.000865294	0.012566	10	ABCA1,ABCG1,CEBPA,CES1,CH25H,DGAT2,FDXR,GPAM,LEP,LIPE
GO:0030219	megakaryocyte differentiation	biological_process	8/414	92/19098	4.01134	0.000867211	0.0125672	8	HIST1H3B,HIST1H3C,HIST1H3F,HIST1H3I,ITGA2B,NR4A3,THBS1,ZNF385A
GO:0002791	regulation of peptide secretion	biological_process	21/414	450/19098	2.15275	0.000879958	0.0127251	21	ACVR1C,ADORA2A,ARNTL,CADM1,CCL5,CSF1R,F2R,FCGR2B,GPAM,IL1RL1,IL6,KCNS3,LEP,RASGRP1,RASL10B,SFRP1,SLC25A4,SYK,TLR6,TLR8,TRPM2
GO:0055085	transmembrane transport	biological_process	52/414	1536/19098	1.56171	0.000883234	0.0127457	52	ABCA1,ABCB5,ABCG1,ADAMTS8,ADIPOQ,AQP1,AQP4,ARC,ATP5F1D,C3,CALM1,CHRNA1,CLIC6,CTSS,CXCL9,CYBB,DHRS7C,EMB,F2R,F2RL3,GABRE,GALNT8,GRPEL2,KCNA6,KCNA7,KCNJ5,KCNS3,LEP,MPC1,NOS1,NR4A3,PDE4B,PIK3R2,PRKCB,RARRES2,SCN9A,SLC14A1,SLC25A4,SLC2A5,SLC37A2,SLC38A3,SLC39A14,SLC4A1,SLC6A6,SLC7A10,SLCO4A1,STEAP3,THBS1,THRSP,TRPM2,TRPV3,TUSC5
GO:0010742	macrophage derived foam cell differentiation	biological_process	5/414	35/19098	6.59006	0.000887495	0.0127536	5	ABCA1,ABCG1,ADIPOQ,IL18,PLA2G2A
GO:0090077	foam cell differentiation	biological_process	5/414	35/19098	6.59006	0.000887495	0.0127536	5	ABCA1,ABCG1,ADIPOQ,IL18,PLA2G2A
GO:0070661	leukocyte proliferation	biological_process	15/414	271/19098	2.55335	0.000892002	0.0127916	15	CCL5,CD209,CD4,DOCK2,FCGR2B,GPAM,HLA-DMB,IL18,IL6,IL7R,LEP,LMO1,PNP,PRKAR1A,SYK
GO:0008645	hexose transmembrane transport	biological_process	9/414	115/19098	3.61021	0.000900679	0.0128891	9	ADIPOQ,C3,LEP,NR4A3,PIK3R2,PRKCB,RARRES2,SLC2A5,TUSC5
GO:0045088	regulation of innate immune response	biological_process	20/414	420/19098	2.19669	0.000907162	0.0129549	20	CADM1,CCL5,CD209,CLEC10A,CR1,CTSL,CTSS,FCGR2B,HSPA1B,ITGAM,ITGB2,LEP,PIK3AP1,RAET1E,RASGRP1,SH2D1A,SYK,TLR6,TLR7,TLR8
GO:0052548	regulation of endopeptidase activity	biological_process	19/414	390/19098	2.24738	0.000925875	0.0131947	19	ACVR1C,ADORA2A,AQP1,C3,C4A,C4B,CR1,CST7,F2R,NAIP,RENBP,RFFL,SERPINB1,SERPINB2,SERPINE1,SLPI,TFPI2,THBS1,WFIKKN1
GO:0050708	regulation of protein secretion	biological_process	20/414	421/19098	2.19147	0.000933825	0.0132804	20	ACVR1C,ADORA2A,ARNTL,CADM1,CCL5,CSF1R,F2R,FCGR2B,GPAM,IL1RL1,IL6,KCNS3,LEP,RASGRP1,SFRP1,SLC25A4,SYK,TLR6,TLR8,TRPM2
GO:1901652	response to peptide	biological_process	22/414	484/19098	2.09684	0.00094267	0.0133785	22	ACVR1C,ADIPOQ,ADM,AGTRAP,AVPR1A,CISH,CYBB,DDX11,FBN1,FCGR2B,GOT1,KLF1,LEP,NR4A3,PCK1,PIK3R2,PRKAR1A,PRKAR2B,PRKCB,RARRES2,TLR6,TUSC5
GO:0002429	immune response-activating cell surface receptor signaling pathway	biological_process	17/414	331/19098	2.36924	0.000958351	0.013573	17	ARPC5,C3AR1,C5AR1,CD209,CD4,CLEC10A,CR1,FCGR2B,GRAP2,HSP90AA1,IGLL5,ITK,NR4A3,PDE4B,PIK3R2,PRKCB,SYK
GO:0019400	alditol metabolic process	biological_process	4/414	21/19098	8.78675	0.000972147	0.0137119	4	DGAT2,GOT1,LEP,PCK1
GO:0019865	immunoglobulin binding	molecular_function	4/414	21/19098	8.78675	0.000972147	0.0137119	4	CD4,FCGR2B,JCHAIN,MS4A2
GO:0071216	cellular response to biotic stimulus	biological_process	12/414	191/19098	2.89825	0.000974571	0.0137179	12	ABCA1,CCL2,CCL5,CSF3,FCGR2B,IL18,IL6,MRC1,PDE4B,SERPINE1,SYK,TLR6
GO:0030246	carbohydrate binding	molecular_function	15/414	274/19098	2.52539	0.000996781	0.0140018	15	C4B,CD209,CD248,CHI3L2,CHODL,CLEC10A,CLEC3B,GALNT8,GALNTL6,LGALS2,LGALSL,MAN2B1,MRC1,SELE,SLC2A5
GO:0002715	regulation of natural killer cell mediated immunity	biological_process	5/414	36/19098	6.407	0.00101252	0.014165	5	CADM1,LEP,RAET1E,RASGRP1,SH2D1A
GO:0008207	C21-steroid hormone metabolic process	biological_process	5/414	36/19098	6.407	0.00101252	0.014165	5	ADM,AKR1C1,AKR1C2,AKR1C3,FDXR
GO:0015749	monosaccharide transmembrane transport	biological_process	9/414	117/19098	3.54849	0.00101858	0.0142208	9	ADIPOQ,C3,LEP,NR4A3,PIK3R2,PRKCB,RARRES2,SLC2A5,TUSC5
GO:0071496	cellular response to external stimulus	biological_process	16/414	305/19098	2.41996	0.00107468	0.0149145	16	AKR1C3,ALB,AQP1,AVPR1A,CYBB,DSC2,FOLR2,FOSL1,HDAC4,LEP,MAP3K14,PCK1,SFRP1,SLC38A3,TLR7,TLR8
GO:0051384	response to glucocorticoid	biological_process	10/414	142/19098	3.24862	0.00107734	0.0149145	10	ADIPOQ,ADM,ALPL,AQP1,AVPR1A,FOSL1,GOT1,IL6,S100B,SDC1
GO:0005178	integrin binding	molecular_function	9/414	118/19098	3.51842	0.00108205	0.0149145	9	ACTN3,ADAMTS8,EGFL6,FBN1,ITGB6,SYK,THBS1,THBS4,WISP1
GO:0004875	complement receptor activity	molecular_function	3/414	10/19098	13.8391	0.00108347	0.0149145	3	C3AR1,C5AR1,CR1
GO:0035630	bone mineralization involved in bone maturation	biological_process	3/414	10/19098	13.8391	0.00108347	0.0149145	3	ACTN3,LEP,PHOSPHO1
GO:0035747	natural killer cell chemotaxis	biological_process	3/414	10/19098	13.8391	0.00108347	0.0149145	3	CCL2,CCL5,CXCL14
GO:2001198	regulation of dendritic cell differentiation	biological_process	3/414	10/19098	13.8391	0.00108347	0.0149145	3	FCGR2B,TMEM176A,TMEM176B
GO:0038023	signaling receptor activity	molecular_function	50/414	1477/19098	1.56163	0.00111522	0.0152745	50	ABCA1,ACKR4,ACVR1C,ADGRV1,ADORA2A,AGTRAP,AVPR1A,C3AR1,C5AR1,CADM1,CD4,CD5,CHRNA1,CR1,CSF1R,EFEMP1,EVI2A,F2R,F2RL3,FCGR2B,GABRE,GPR135,GPR174,GPR37,GPRC5A,IGSF1,IL10RA,IL12RB2,IL1RL1,IL31RA,IL7R,ITGB2,ITGB6,LILRB5,LYVE1,MMD,MRC1,NR4A3,OPRD1,PTGFR,RXRG,SELE,SFRP1,SFRP4,SPHK1,TIGIT,TLR6,TLR7,TLR8,VIPR2
GO:0060089	molecular transducer activity	molecular_function	50/414	1477/19098	1.56163	0.00111522	0.0152745	50	ABCA1,ACKR4,ACVR1C,ADGRV1,ADORA2A,AGTRAP,AVPR1A,C3AR1,C5AR1,CADM1,CD4,CD5,CHRNA1,CR1,CSF1R,EFEMP1,EVI2A,F2R,F2RL3,FCGR2B,GABRE,GPR135,GPR174,GPR37,GPRC5A,IGSF1,IL10RA,IL12RB2,IL1RL1,IL31RA,IL7R,ITGB2,ITGB6,LILRB5,LYVE1,MMD,MRC1,NR4A3,OPRD1,PTGFR,RXRG,SELE,SFRP1,SFRP4,SPHK1,TIGIT,TLR6,TLR7,TLR8,VIPR2
GO:0030217	T cell differentiation	biological_process	13/414	221/19098	2.71355	0.00111629	0.0152745	13	CD4,CR1,DOCK2,DTX1,IL18,IL6,IL7R,ITK,LEP,PNP,RASGRP1,SYK,VNN1
GO:0009187	cyclic nucleotide metabolic process	biological_process	10/414	143/19098	3.2259	0.00113651	0.0155202	10	ADM,ADORA2A,AQP1,CALM1,CXCL9,NOS1,PALM,PDE4B,PDE4C,THBS1
GO:0042035	regulation of cytokine biosynthetic process	biological_process	8/414	96/19098	3.8442	0.00114635	0.0156236	8	CD4,CYBB,IL6,SYK,THBS1,TLR6,TLR7,TLR8
GO:0040011	locomotion	biological_process	55/414	1669/19098	1.52018	0.00116217	0.0157625	55	ACKR4,ACVR1C,ADAMTS9,ADIPOQ,ADORA2A,ARC,ARPC5,BTC,C3AR1,C5AR1,C5orf30,CCL2,CCL5,CD248,CH25H,CHL1,CITED2,CSF1R,CXCL14,CXCL3,CXCL9,DOCK2,F2R,FOSL1,GPR37,GRAP2,HDAC4,IL6,ITGA2B,ITGAM,ITGB2,JCHAIN,LEP,NCAM1,NR4A3,PDE4B,PDGFD,PIK3R2,PLTP,PTP4A3,RARRES2,RFFL,SDC1,SELE,SELPLG,SERPINE1,SFRP1,SIRPA,SLC7A10,SPHK1,SYK,TDGF1,THBS1,THBS4,TRPM2
GO:0001934	positive regulation of protein phosphorylation	biological_process	35/414	932/19098	1.73237	0.0011637	0.0157625	35	ADIPOQ,C3,C5AR1,CALM1,CCL2,CCL5,CD4,CSF1R,CSF3,F2R,FCGR2B,FGF9,GPR37,HSP90AA1,HSPH1,IL18,IL31RA,IL6,KLB,LEP,MAP3K14,MMD,OPRD1,PDGFD,PLA2G2A,PRKAR1A,PRKAR2B,RARRES2,RASGRP1,SPHK1,SYK,TDGF1,THBS1,THBS4,TLR6
GO:0002717	positive regulation of natural killer cell mediated immunity	biological_process	4/414	22/19098	8.38735	0.00116801	0.0157625	4	CADM1,RAET1E,RASGRP1,SH2D1A
GO:0002888	positive regulation of myeloid leukocyte mediated immunity	biological_process	4/414	22/19098	8.38735	0.00116801	0.0157625	4	C3,ITGAM,ITGB2,SYK
GO:0043032	positive regulation of macrophage activation	biological_process	4/414	22/19098	8.38735	0.00116801	0.0157625	4	IL1RL1,ITGAM,THBS1,TLR6
GO:0071219	cellular response to molecule of bacterial origin	biological_process	11/414	169/19098	3.00257	0.0011785	0.0158728	11	ABCA1,CCL2,CCL5,CSF3,FCGR2B,IL18,IL6,MRC1,PDE4B,SERPINE1,TLR6
GO:0042267	natural killer cell mediated cytotoxicity	biological_process	6/414	55/19098	5.03241	0.00118285	0.0159002	6	CADM1,IL18,LEP,RAET1E,RASGRP1,SH2D1A
GO:0046427	positive regulation of JAK-STAT cascade	biological_process	7/414	75/19098	4.30551	0.00119484	0.01603	7	CCL5,CSF1R,F2R,IL18,IL31RA,IL6,LEP
GO:0051896	regulation of protein kinase B signaling	biological_process	12/414	196/19098	2.82431	0.00121801	0.0162851	12	AKR1C2,AKR1C3,BTC,CSF3,FGF9,HSP90AA1,IL18,KLB,LEP,PIK3AP1,PIK3R2,THBS1
GO:0034219	carbohydrate transmembrane transport	biological_process	9/414	120/19098	3.45978	0.0012186	0.0162851	9	ADIPOQ,C3,LEP,NR4A3,PIK3R2,PRKCB,RARRES2,SLC2A5,TUSC5
GO:0005775	vacuolar lumen	cellular_component	11/414	170/19098	2.98491	0.00123613	0.0164873	11	ADA2,C3,CREG1,CTSL,CTSS,GRN,HSP90AA1,KERA,MAN2B1,PPT1,SDC1
GO:0042803	protein homodimerization activity	molecular_function	31/414	797/19098	1.79428	0.00127908	0.0170271	31	ABCG1,ACTN3,ADA2,ADIPOQ,ADSSL1,C1QB,CADM1,CCL5,CD4,CEBPA,CSF1R,DGAT2,E2F8,ERCC5,GRPEL2,HPGDS,HSP90AA1,JCHAIN,MASP1,MYOM3,NR4A3,PLEK,RASGRP1,RENBP,RPE,S100B,SLC4A1,THRSP,TIGIT,TOP2A,TRIM9
GO:0034109	homotypic cell-cell adhesion	biological_process	7/414	76/19098	4.24886	0.00129199	0.0171326	7	ADAMTS18,CCL5,CSRP1,DSC2,ITGA2B,PLEK,SYK
GO:0045652	regulation of megakaryocyte differentiation	biological_process	7/414	76/19098	4.24886	0.00129199	0.0171326	7	HIST1H3B,HIST1H3C,HIST1H3F,HIST1H3I,ITGA2B,NR4A3,THBS1
GO:0044853	plasma membrane raft	cellular_component	8/414	98/19098	3.76575	0.00131054	0.017345	8	F2R,ITGAM,ITGB2,LIPE,NOS1,PRKAR1A,SELE,SELPLG
GO:0008202	steroid metabolic process	biological_process	16/414	311/19098	2.37327	0.00131571	0.01738	16	ABCA1,ABCG1,ADM,AKR1C1,AKR1C2,AKR1C3,CEBPA,CES1,CH25H,DGAT2,FDXR,GPAM,LEP,LIPE,OSBPL3,OSBPL6
GO:0048869	cellular developmental process	biological_process	117/414	4189/19098	1.28844	0.00132696	0.017495	117	ABCA1,ABCB5,ABCG1,ACTN3,ACVR1C,ADAMTS9,ADGRV1,ADIPOQ,ADM,ADORA2A,AKR1C1,AKR1C2,AKR1C3,ALPL,ARC,ARNTL,AVPR1A,BLNK,BTC,C1QC,CADM1,CCL2,CD4,CD53,CEBPA,CES1,CHL1,CHODL,CITED2,CLDN5,COL11A1,COL11A2,CR1,CSF1R,CSF3,CSRP3,CTSL,CXCL14,CXCL9,DLK1,DOCK2,DSC2,DTX1,E2F8,EFEMP1,EGFL6,EPB42,FABP7,FBN1,FCGR2B,FGF9,GRAP2,HDAC4,HHIP,HIST1H3B,HIST1H3C,HIST1H3F,HIST1H3I,HSP90AA1,HSPA1B,IL18,IL31RA,IL6,IL7R,IRX3,ITGA…
GO:0000323	lytic vacuole	cellular_component	27/414	663/19098	1.87861	0.00135509	0.0176152	27	ACP5,ADA2,C3,C3AR1,CP,CREG1,CTSL,CTSS,GOT1,GRN,HLA-DMB,HSP90AA1,KERA,MAN2B1,MARCH1,MMD,NR4A3,NSF,PLBD1,PPT1,RAB37,RASGRP1,SDC1,TLR7,TLR8,TRPM2,VNN1
GO:0005764	lysosome	cellular_component	27/414	663/19098	1.87861	0.00135509	0.0176152	27	ACP5,ADA2,C3,C3AR1,CP,CREG1,CTSL,CTSS,GOT1,GRN,HLA-DMB,HSP90AA1,KERA,MAN2B1,MARCH1,MMD,NR4A3,NSF,PLBD1,PPT1,RAB37,RASGRP1,SDC1,TLR7,TLR8,TRPM2,VNN1
GO:0045861	negative regulation of proteolysis	biological_process	17/414	342/19098	2.29303	0.00136543	0.0176152	17	ADORA2A,AQP1,C3,C4A,C4B,CR1,CST7,NAIP,RENBP,RFFL,SERPINB1,SERPINB2,SERPINE1,SLPI,TFPI2,THBS1,WFIKKN1
GO:0030018	Z disc	cellular_component	9/414	122/19098	3.40306	0.00136873	0.0176152	9	ACTN3,CSRP3,HDAC4,IGFN1,MYOM3,MYOZ3,NOS1,PDE4B,SLC4A1
GO:0001794	type IIa hypersensitivity	biological_process	2/414	3/19098	30.7536	0.0013862	0.0176152	2	C3,FCGR2B
GO:0001796	regulation of type IIa hypersensitivity	biological_process	2/414	3/19098	30.7536	0.0013862	0.0176152	2	C3,FCGR2B
GO:0002445	type II hypersensitivity	biological_process	2/414	3/19098	30.7536	0.0013862	0.0176152	2	C3,FCGR2B
GO:0002892	regulation of type II hypersensitivity	biological_process	2/414	3/19098	30.7536	0.0013862	0.0176152	2	C3,FCGR2B
GO:0034769	basement membrane disassembly	biological_process	2/414	3/19098	30.7536	0.0013862	0.0176152	2	CMA1,CTSS
GO:0045917	positive regulation of complement activation	biological_process	2/414	3/19098	30.7536	0.0013862	0.0176152	2	C3,C6
GO:0047023	androsterone dehydrogenase activity	molecular_function	2/414	3/19098	30.7536	0.0013862	0.0176152	2	AKR1C1,AKR1C3
GO:0047718	indanol dehydrogenase activity	molecular_function	2/414	3/19098	30.7536	0.0013862	0.0176152	2	AKR1C1,AKR1C3
GO:0051365	cellular response to potassium ion starvation	biological_process	2/414	3/19098	30.7536	0.0013862	0.0176152	2	PCK1,SLC38A3
GO:0070051	fibrinogen binding	molecular_function	2/414	3/19098	30.7536	0.0013862	0.0176152	2	ITGA2B,THBS1
GO:1902162	regulation of DNA damage response, signal transduction by p53 class mediator resulting in transcription of p21 class mediator	biological_process	2/414	3/19098	30.7536	0.0013862	0.0176152	2	PYHIN1,ZNF385A
GO:1902164	positive regulation of DNA damage response, signal transduction by p53 class mediator resulting in transcription of p21 class mediator	biological_process	2/414	3/19098	30.7536	0.0013862	0.0176152	2	PYHIN1,ZNF385A
GO:2000259	positive regulation of protein activation cascade	biological_process	2/414	3/19098	30.7536	0.0013862	0.0176152	2	C3,C6
GO:0001516	prostaglandin biosynthetic process	biological_process	4/414	23/19098	8.02268	0.00138993	0.0176152	4	AKR1C3,AVPR1A,HPGDS,PTGS1
GO:0046457	prostanoid biosynthetic process	biological_process	4/414	23/19098	8.02268	0.00138993	0.0176152	4	AKR1C3,AVPR1A,HPGDS,PTGS1
GO:0055094	response to lipoprotein particle	biological_process	4/414	23/19098	8.02268	0.00138993	0.0176152	4	ABCA1,ITGB2,SYK,TLR6
GO:0071379	cellular response to prostaglandin stimulus	biological_process	4/414	23/19098	8.02268	0.00138993	0.0176152	4	AKR1C2,AKR1C3,PTGFR,SFRP1
GO:0030301	cholesterol transport	biological_process	7/414	77/19098	4.19368	0.00139522	0.0176496	7	ABCA1,ABCG1,ADIPOQ,AKR1C1,CES1,LEP,PLTP
GO:0051924	regulation of calcium ion transport	biological_process	13/414	227/19098	2.64183	0.00142178	0.0179526	13	ADORA2A,CALM1,CCL2,CCL5,CD4,CXCL9,DHRS7C,F2R,F2RL3,NOS1,OPRD1,PDE4B,TRPV3
GO:0009653	anatomical structure morphogenesis	biological_process	76/414	2509/19098	1.39733	0.0014496	0.0182703	76	ACP5,ACTN3,ADAMTS9,ADIPOQ,ADM,ADORA2A,ALPL,AQP1,ARC,C3,C3AR1,C5AR1,C6,CCL2,CD248,CD53,CHL1,CITED2,CLDN5,CMA1,COL11A1,COL11A2,CSF1R,CSRP3,CXCL9,CYBB,DUSP2,E2F2,E2F8,EFEMP1,ELN,EPB42,F2R,FBN1,FGF9,FRAS1,HHIP,HSP90AA1,IER3,IL18,IL6,IL7R,IRX3,ITGB2,LEP,LYVE1,MAP2,MAP6D1,MMP19,MYL3,MYOM3,MYOZ3,NCAM1,NOS1,NR4A3,NYAP2,PALM,PHOSPHO1,PRKAR1A,PRKCB,S100B,SDC1,SERPINE1,SFRP1,SFRP4,SPHK1,SYK,TDGF1,TGM2,THBS1…
GO:0002430	complement receptor mediated signaling pathway	biological_process	3/414	11/19098	12.581	0.0014659	0.0183217	3	C3AR1,C5AR1,CR1
GO:0019371	cyclooxygenase pathway	biological_process	3/414	11/19098	12.581	0.0014659	0.0183217	3	AKR1C3,HPGDS,PTGS1
GO:0033089	positive regulation of T cell differentiation in thymus	biological_process	3/414	11/19098	12.581	0.0014659	0.0183217	3	IL7R,RASGRP1,VNN1
GO:1905953	negative regulation of lipid localization	biological_process	5/414	39/19098	5.91416	0.00146631	0.0183217	5	ABCA1,ABCG1,IL6,LEP,THBS1
GO:0051240	positive regulation of multicellular organismal process	biological_process	51/414	1534/19098	1.53367	0.00146702	0.0183217	51	ACTN3,ADIPOQ,ADM,ADORA2A,AQP1,ARNTL,AVPR1A,C3,C3AR1,C5AR1,C6,CADM1,CD4,CEBPA,CITED2,CMA1,CSF1R,CSF3,CYBB,F2R,FGF9,GPAM,HSPA1B,IL12RB2,IL18,IL1RL1,IL6,IL7R,IRX3,ITGB2,LEP,MMD,NOS1,NR4A3,PDE4B,PDGFD,PLEK,PNP,PRKCB,RASGRP1,S100B,SERPINE1,SPHK1,SYK,TDGF1,THBS1,TIGIT,TLR6,TLR7,TLR8,VNN1
GO:0061061	muscle structure development	biological_process	25/414	600/19098	1.9221	0.00148242	0.0184805	25	ACTN3,ADM,ARNTL,AVPR1A,CD53,CHODL,CHRNA1,CITED2,COL11A1,CSRP3,CXCL14,CXCL9,ELN,FGF9,HDAC4,IL18,MYL3,MYOM3,MYOZ3,NMRK2,NOS1,PRKAR1A,S100B,SDC1,WFIKKN1
GO:0014812	muscle cell migration	biological_process	7/414	78/19098	4.13991	0.00150477	0.0186576	7	ADIPOQ,ARPC5,CCL5,HDAC4,PDGFD,SERPINE1,THBS4
GO:0030193	regulation of blood coagulation	biological_process	7/414	78/19098	4.13991	0.00150477	0.0186576	7	ADAMTS18,F2R,PLEK,SERPINB2,SERPINE1,SYK,THBS1
GO:1900046	regulation of hemostasis	biological_process	7/414	78/19098	4.13991	0.00150477	0.0186576	7	ADAMTS18,F2R,PLEK,SERPINB2,SERPINE1,SYK,THBS1
GO:0031401	positive regulation of protein modification process	biological_process	40/414	1127/19098	1.63728	0.00151735	0.0187743	40	ADIPOQ,ARNTL,C3,C5AR1,CALM1,CCL2,CCL5,CD4,CSF1R,CSF3,DCUN1D4,F2R,FCGR2B,FGF9,GPR37,HDAC4,HIST1H1B,HSP90AA1,HSPH1,IL18,IL31RA,IL6,KLB,LEP,MAP3K14,MMD,NOS1,OPRD1,PDGFD,PLA2G2A,PRKAR1A,PRKAR2B,RARRES2,RASGRP1,SPHK1,SYK,TDGF1,THBS1,THBS4,TLR6
GO:0046872	metal ion binding	molecular_function	115/414	4120/19098	1.28762	0.00151966	0.0187743	115	AC067968.1,ACP5,ACTN3,ACVR1C,ADA2,ADAM28,ADAMTS15,ADAMTS18,ADAMTS4,ADAMTS8,ADAMTS9,ADGRV1,ADSSL1,ALB,ALPL,C1S,C2,CA14,CALM1,CALML6,CD209,CD248,CD4,CH25H,CLEC3B,COL11A1,COL11A2,CP,CPXM1,CREB5,CSRP1,CSRP3,CYB561D2,CYBB,DDX11,DLK1,DSC2,DTX1,EFEMP1,EGFL6,ERCC5,F13A1,FAT3,FBN1,FBXO30,FRAS1,GALNT8,GALNTL6,HBD,HBM,HDAC4,HHIP,HPCAL4,HPGDS,ITGA2B,ITGAM,ITGB2,ITK,KLF1,LMCD1,LMO1,LONRF3,LOXL1,LVRN,MAN2B1,MA…
GO:0001932	regulation of protein phosphorylation	biological_process	46/414	1350/19098	1.57185	0.00155388	0.0191626	46	ADIPOQ,ADORA2A,C3,C5AR1,CALM1,CCL2,CCL5,CD4,CEBPA,CISH,CSF1R,CSF3,DUSP2,F2R,FCGR2B,FGF9,GPR37,GPRC5A,HSP90AA1,HSPH1,IL18,IL31RA,IL6,ITGB2,KLB,LEP,MAP3K14,MMD,OPRD1,PDGFD,PIK3R2,PLA2G2A,PPP1R1B,PRKAR1A,PRKAR2B,RARRES2,RASGRP1,SFRP1,SPHK1,SYK,TDGF1,THBS1,THBS4,TLR6,TLR7,TLR8
GO:0042493	response to drug	biological_process	35/414	949/19098	1.70133	0.00158035	0.0194541	35	ABCA1,ABCB5,ADIPOQ,ADORA2A,ADSSL1,AQP1,CHRNA1,CLDN5,CSF3,CYBB,DDX11,FOLR2,FOSL1,GPR37,HBD,HBM,HDAC4,HSPH1,IL6,LEP,NOS1,NQO1,NR4A3,PDE4B,PDGFD,PNP,PPP1R1B,PRKAR2B,SDC1,SFRP1,SLC25A4,SLC38A3,SLC7A10,THBS1,TRPM2
GO:0019955	cytokine binding	molecular_function	8/414	101/19098	3.6539	0.00159133	0.0195527	8	ACKR4,CD4,CSF1R,IL10RA,IL1RL1,IL31RA,THBS1,WFIKKN1
GO:0045089	positive regulation of innate immune response	biological_process	17/414	347/19098	2.25999	0.00159405	0.0195527	17	CADM1,CCL5,CD209,CLEC10A,CTSL,CTSS,HSPA1B,ITGAM,ITGB2,PIK3AP1,RAET1E,RASGRP1,SH2D1A,SYK,TLR6,TLR7,TLR8
GO:0070997	neuron death	biological_process	16/414	317/19098	2.32835	0.00160084	0.019601	16	ADORA2A,C5AR1,CCL2,CCL5,CHL1,CSF3,F2R,FCGR2B,HDAC4,ITGAM,NAIP,NQO1,NR4A3,PPT1,TLR6,TRPM2
GO:0010827	regulation of glucose transmembrane transport	biological_process	7/414	79/19098	4.08751	0.00162092	0.0198115	7	ADIPOQ,C3,LEP,NR4A3,PIK3R2,PRKCB,RARRES2
GO:0014070	response to organic cyclic compound	biological_process	35/414	951/19098	1.69776	0.00163702	0.0199342	35	ABCA1,ADIPOQ,ADM,ADORA2A,AKR1C3,ALPL,AQP1,ARNTL,AVPR1A,CCL2,CCL5,CD4,CEBPA,CYBB,FOLR2,FOSL1,GOT1,GPAM,IL18,IL6,LEP,MMP19,NQO1,NR4A3,PCK1,PDE4B,PPP1R1B,PRKAR2B,PTGFR,RXRG,S100B,SDC1,SFRP1,THBS1,TRPM2
GO:0007202	activation of phospholipase C activity	biological_process	4/414	24/19098	7.68841	0.00163966	0.0199342	4	AVPR1A,C5AR1,ITK,SELE
GO:1903792	negative regulation of anion transport	biological_process	4/414	24/19098	7.68841	0.00163966	0.0199342	4	GABRE,LEP,SFRP4,THBS1
GO:0032609	interferon-gamma production	biological_process	8/414	102/19098	3.61807	0.00169483	0.0205686	8	IL12RB2,IL18,IL1RL1,ITK,PDE4B,RASGRP1,TLR7,TLR8
GO:0002228	natural killer cell mediated immunity	biological_process	6/414	59/19098	4.69123	0.00170986	0.0206662	6	CADM1,IL18,LEP,RAET1E,RASGRP1,SH2D1A
GO:0010517	regulation of phospholipase activity	biological_process	6/414	59/19098	4.69123	0.00170986	0.0206662	6	AVPR1A,C5AR1,CCL5,ITK,PPT1,SELE
GO:0016125	sterol metabolic process	biological_process	10/414	151/19098	3.055	0.00171191	0.0206662	10	ABCA1,ABCG1,CEBPA,CES1,CH25H,DGAT2,FDXR,GPAM,LEP,LIPE
GO:0032270	positive regulation of cellular protein metabolic process	biological_process	49/414	1470/19098	1.53768	0.00172576	0.0207969	49	ACVR1C,ADIPOQ,ARNTL,C3,C5AR1,C6,CALM1,CCL2,CCL5,CD4,CEBPA,CLEC3B,CR1,CSF1R,CSF3,DCUN1D4,F2R,FCGR2B,FGF9,GPR37,HDAC4,HIST1H1B,HSP90AA1,HSPH1,IL18,IL31RA,IL6,KLB,LEP,LONRF3,MAP3K14,MMD,NOS1,OPRD1,PDGFD,PLA2G2A,PRKAR1A,PRKAR2B,PRR16,PYHIN1,RARRES2,RASGRP1,SPHK1,SYK,TDGF1,THBS1,THBS4,TLR6,ZFAND2A
GO:0048870	cell motility	biological_process	48/414	1433/19098	1.54519	0.00174371	0.0209398	48	ACVR1C,ADAMTS9,ADIPOQ,ARC,ARPC5,BTC,C3AR1,C5AR1,C5orf30,CCL2,CCL5,CD248,CH25H,CHL1,CITED2,CSF1R,CXCL14,CXCL3,CXCL9,F2R,GRAP2,HDAC4,IL6,ITGA2B,ITGAM,ITGB2,JCHAIN,LEP,PDE4B,PDGFD,PIK3R2,PLTP,PTP4A3,RARRES2,RFFL,SDC1,SELE,SELPLG,SERPINE1,SFRP1,SIRPA,SLC7A10,SPHK1,SYK,TDGF1,THBS1,THBS4,TRPM2
GO:0051674	localization of cell	biological_process	48/414	1433/19098	1.54519	0.00174371	0.0209398	48	ACVR1C,ADAMTS9,ADIPOQ,ARC,ARPC5,BTC,C3AR1,C5AR1,C5orf30,CCL2,CCL5,CD248,CH25H,CHL1,CITED2,CSF1R,CXCL14,CXCL3,CXCL9,F2R,GRAP2,HDAC4,IL6,ITGA2B,ITGAM,ITGB2,JCHAIN,LEP,PDE4B,PDGFD,PIK3R2,PLTP,PTP4A3,RARRES2,RFFL,SDC1,SELE,SELPLG,SERPINE1,SFRP1,SIRPA,SLC7A10,SPHK1,SYK,TDGF1,THBS1,THBS4,TRPM2
GO:0042325	regulation of phosphorylation	biological_process	49/414	1472/19098	1.53559	0.00177458	0.0212732	49	ACTN3,ADIPOQ,ADORA2A,C3,C5AR1,CALM1,CCL2,CCL5,CD4,CEBPA,CISH,CSF1R,CSF3,DUSP2,F2R,FCGR2B,FGF9,GPR37,GPRC5A,HDAC4,HSP90AA1,HSPH1,IL18,IL31RA,IL6,ITGB2,KLB,LEP,MAP3K14,MMD,NRBF2,OPRD1,PDGFD,PIK3R2,PLA2G2A,PPP1R1B,PRKAR1A,PRKAR2B,RARRES2,RASGRP1,SFRP1,SPHK1,SYK,TDGF1,THBS1,THBS4,TLR6,TLR7,TLR8
GO:0050801	ion homeostasis	biological_process	29/414	745/19098	1.79568	0.00179866	0.0215244	29	ABCA1,ABCG1,ADM,ADORA2A,AVPR1A,C3AR1,C5AR1,CALM1,CCL5,CD4,CP,CSRP3,CXCL9,DGAT2,DHRS7C,EPB42,F2R,F2RL3,GOT1,GPAM,NOS1,PPT1,PRKCB,SFRP4,SLC39A14,SLC4A1,STEAP3,TGM2,TRPM2
GO:1905952	regulation of lipid localization	biological_process	9/414	127/19098	3.26909	0.0018099	0.0216212	9	ABCA1,ABCG1,ADIPOQ,C3,IL6,LEP,PLTP,SYK,THBS1
GO:0042531	positive regulation of tyrosine phosphorylation of STAT protein	biological_process	6/414	60/19098	4.61304	0.00186575	0.0222497	6	CCL5,CSF1R,IL18,IL31RA,IL6,LEP
GO:0032612	interleukin-1 production	biological_process	7/414	81/19098	3.98658	0.00187404	0.0222713	7	ABCA1,ACP5,CMA1,F2R,SPHK1,TLR6,TLR8
GO:0097006	regulation of plasma lipoprotein particle levels	biological_process	7/414	81/19098	3.98658	0.00187404	0.0222713	7	ABCA1,ABCG1,ADIPOQ,ALB,DGAT2,PLA2G2A,PLTP
GO:0052547	regulation of peptidase activity	biological_process	19/414	415/19098	2.112	0.00189526	0.0224845	19	ACVR1C,ADORA2A,AQP1,C3,C4A,C4B,CR1,CST7,F2R,NAIP,RENBP,RFFL,SERPINB1,SERPINB2,SERPINE1,SLPI,TFPI2,THBS1,WFIKKN1
GO:0001774	microglial cell activation	biological_process	4/414	25/19098	7.38087	0.00191892	0.02266	4	ITGAM,TLR6,TLR7,TLR8
GO:0001968	fibronectin binding	molecular_function	4/414	25/19098	7.38087	0.00191892	0.02266	4	CCDC80,CTSL,CTSS,THBS1
GO:0010755	regulation of plasminogen activation	biological_process	3/414	12/19098	11.5326	0.00192325	0.02266	3	CLEC3B,SERPINE1,THBS1
GO:0070493	thrombin-activated receptor signaling pathway	biological_process	3/414	12/19098	11.5326	0.00192325	0.02266	3	F2R,F2RL3,PLEK
GO:0001664	G-protein coupled receptor binding	molecular_function	14/414	264/19098	2.44631	0.00195455	0.0229894	14	ADA2,ADM,ADORA2A,AVPR1A,C3,CCL2,CCL5,CXCL14,CXCL3,CXCL9,HSPA1B,PALM,PPP1R1B,SFRP1
GO:0048771	tissue remodeling	biological_process	10/414	154/19098	2.99548	0.00198062	0.0232562	10	ACP5,CSF1R,F2R,IL18,IL6,LEP,SFRP1,SYK,TGM2,THBS4
GO:0017144	drug metabolic process	biological_process	30/414	786/19098	1.7607	0.00202953	0.0237802	30	ACP5,ACSS1,ACTN3,ADA2,ADM,ADSSL1,AKR1C1,AKR1C2,AKR1C3,ALDH3A2,ATP5F1D,BDH1,CKMT2,CYBB,FOLR2,GLYAT,GPR37,GPX3,HDAC4,HSP90AA1,HSPA1B,ITGAM,ITGB2,MPV17L,NOS1,NQO1,PGAM2,PXDNL,RENBP,TLR6
GO:0006809	nitric oxide biosynthetic process	biological_process	6/414	61/19098	4.53742	0.00203217	0.0237802	6	ACP5,HSP90AA1,ITGB2,NOS1,NQO1,TLR6
GO:0030545	receptor regulator activity	molecular_function	21/414	482/19098	2.00983	0.0020457	0.0238785	21	ADA2,ADIPOQ,ADM,BTC,CCL2,CCL5,CSF3,CXCL14,CXCL3,CXCL9,EFEMP1,FBN1,FGF9,GRN,IL18,IL6,LEP,PDGFD,TDGF1,THBS4,WFIKKN1
GO:0010883	regulation of lipid storage	biological_process	5/414	42/19098	5.49172	0.00205448	0.0238785	5	ABCA1,ABCG1,C3,IL6,LEP
GO:0032371	regulation of sterol transport	biological_process	5/414	42/19098	5.49172	0.00205448	0.0238785	5	ABCA1,ABCG1,ADIPOQ,LEP,PLTP
GO:0032374	regulation of cholesterol transport	biological_process	5/414	42/19098	5.49172	0.00205448	0.0238785	5	ABCA1,ABCG1,ADIPOQ,LEP,PLTP
GO:0006793	phosphorus metabolic process	biological_process	95/414	3318/19098	1.32079	0.00206287	0.0239356	95	ACP5,ACSS1,ACTN3,ACVR1C,ADIPOQ,ADM,ADORA2A,ADSSL1,ALPL,AQP1,ATP5F1D,BTC,C3,C5AR1,CALM1,CCL2,CCL5,CD4,CDS1,CEBPA,CISH,CKMT2,CSF1R,CSF3,CXCL9,DGAT2,DUSP2,EFEMP1,F2R,FCGR2B,FDXR,FGF9,GLYAT,GPAM,GPR37,GPRC5A,GRAP2,HDAC4,HRASLS5,HSP90AA1,HSPA1B,HSPH1,IL12RB2,IL18,IL31RA,IL6,ITGB2,ITK,KLB,LEP,LIPE,MAP3K14,MMD,MPC1,NCAM1,NME1-NME2,NMRK2,NOS1,NRBF2,OPRD1,PALM,PDE4B,PDE4C,PDGFD,PDPR,PGAM2,PHOSPHO1,PIK3AP1…
GO:0009628	response to abiotic stimulus	biological_process	41/414	1185/19098	1.59607	0.00212086	0.0245669	41	ADIPOQ,ADM,ADSSL1,AGTRAP,AQP1,AVPR1A,CALM1,CDS1,CITED2,COL11A1,CSRP3,CTSS,CYBB,DNAJB1,ERCC5,FOSL1,HDAC4,HSP90AA1,HSPA1B,HSPA6,HSPH1,LEP,LRP11,MAP3K14,MDM4,NOS1,NQO1,OPRD1,PALM,PCK1,PPP1R1B,PRKCB,S100B,SFRP1,SLC38A3,TFEC,THBS1,TLR7,TLR8,TRPM2,TRPV3
GO:0016209	antioxidant activity	molecular_function	7/414	83/19098	3.89052	0.00215679	0.0248991	7	ALB,GPX3,NQO1,PTGS1,PXDNL,SRXN1,TXNRD1
GO:0050818	regulation of coagulation	biological_process	7/414	83/19098	3.89052	0.00215679	0.0248991	7	ADAMTS18,F2R,PLEK,SERPINB2,SERPINE1,SYK,THBS1
GO:0043235	receptor complex	cellular_component	16/414	327/19098	2.25715	0.00219097	0.0252513	16	ACVR1C,ADGRV1,CD4,CHRNA1,GABRE,GPR37,IL6,ITGA2B,ITGAM,ITGB2,ITGB6,RFFL,SYK,TLR6,TLR7,TRPV3
GO:0006801	superoxide metabolic process	biological_process	6/414	62/19098	4.46424	0.00220956	0.025338	6	ACP5,CYBB,ITGAM,ITGB2,NQO1,SYK
GO:0032729	positive regulation of interferon-gamma production	biological_process	6/414	62/19098	4.46424	0.00220956	0.025338	6	IL12RB2,IL18,PDE4B,RASGRP1,TLR7,TLR8
GO:1903201	regulation of oxidative stress-induced cell death	biological_process	6/414	62/19098	4.46424	0.00220956	0.025338	6	GPR37,HSPH1,NR4A3,TLR6,TRPM2,VNN1
GO:0030194	positive regulation of blood coagulation	biological_process	4/414	26/19098	7.09699	0.00222944	0.0254809	4	F2R,PLEK,SERPINE1,THBS1
GO:1900048	positive regulation of hemostasis	biological_process	4/414	26/19098	7.09699	0.00222944	0.0254809	4	F2R,PLEK,SERPINE1,THBS1
GO:0006915	apoptotic process	biological_process	59/414	1875/19098	1.45157	0.00225308	0.0257083	59	ACTN3,ACVR1C,ADIPOQ,ADM,ADORA2A,AKR1C3,ALB,AQP1,BTC,C5AR1,CADM1,CCL2,CCL5,CD248,CD5,CHL1,CIDEC,CITED2,CSF1R,CTSL,E2F2,ERCC5,F2R,FOSL1,GPAM,HDAC4,HHIP,HSPA1B,HSPH1,IER3,IL31RA,IL6,ITGB2,LEP,MAP3K14,MDM4,MPV17L,NAIP,NQO1,NR4A3,PPT1,PRKCB,PTGFR,RFFL,S100B,SERPINB2,SERPINE1,SFRP1,SFRP4,SLC25A4,SPHK1,STEAP3,TDGF1,TGM2,THBS1,TNFAIP8L2,TOP2A,VNN1,ZNF385A
GO:0098797	plasma membrane protein complex	cellular_component	23/414	553/19098	1.91863	0.00231427	0.0263628	23	ACVR1C,C6,CD4,CHRNA1,CYBB,GALNT8,HLA-DMB,HLA-DQB1,IL6,ITGA2B,ITGAM,ITGB2,ITGB6,KCNA6,KCNA7,KCNJ5,KCNS3,MS4A2,NOS1,PDE4B,SCN9A,SYK,TLR6
GO:0009991	response to extracellular stimulus	biological_process	21/414	488/19098	1.98512	0.00236997	0.0269525	21	ABCA1,ACVR1C,ADIPOQ,ADM,ADSSL1,AKR1C3,ALB,ALPL,AVPR1A,C2,CD4,CYBB,DSC2,FOLR2,FOSL1,LEP,LRP11,NQO1,PCK1,SFRP1,SLC38A3
GO:0045121	membrane raft	cellular_component	15/414	300/19098	2.30652	0.00242286	0.0274631	15	ABCA1,CD4,F2R,ITGAM,ITGB2,LIPE,NOS1,OPRD1,PPT1,PRKAR1A,PRKAR2B,SELE,SELPLG,TDGF1,TLR6
GO:0098857	membrane microdomain	cellular_component	15/414	300/19098	2.30652	0.00242286	0.0274631	15	ABCA1,CD4,F2R,ITGAM,ITGB2,LIPE,NOS1,OPRD1,PPT1,PRKAR1A,PRKAR2B,SELE,SELPLG,TDGF1,TLR6
GO:0032870	cellular response to hormone stimulus	biological_process	27/414	691/19098	1.80249	0.00242929	0.0274906	27	ADIPOQ,AGTRAP,AKR1C1,AKR1C2,AKR1C3,AQP1,ARNTL,AVPR1A,CISH,CTSL,CTSS,FBN1,GOT1,GPAM,HDAC4,LEP,NR4A3,PCK1,PIK3R2,PRKAR1A,PRKAR2B,PRKCB,PTGFR,RARRES2,RXRG,SFRP1,TUSC5
GO:0005372	water transmembrane transporter activity	molecular_function	3/414	13/19098	10.6455	0.00246025	0.0276135	3	AQP1,AQP4,SLC14A1
GO:0010745	negative regulation of macrophage derived foam cell differentiation	biological_process	3/414	13/19098	10.6455	0.00246025	0.0276135	3	ABCA1,ABCG1,ADIPOQ
GO:0032725	positive regulation of granulocyte macrophage colony-stimulating factor production	biological_process	3/414	13/19098	10.6455	0.00246025	0.0276135	3	IL18,RASGRP1,SYK
GO:0048266	behavioral response to pain	biological_process	3/414	13/19098	10.6455	0.00246025	0.0276135	3	SCN9A,THBS1,THBS4
GO:0055089	fatty acid homeostasis	biological_process	3/414	13/19098	10.6455	0.00246025	0.0276135	3	DGAT2,GOT1,GPAM
GO:0042327	positive regulation of phosphorylation	biological_process	35/414	975/19098	1.65596	0.00246795	0.0276547	35	ADIPOQ,C3,C5AR1,CALM1,CCL2,CCL5,CD4,CSF1R,CSF3,F2R,FCGR2B,FGF9,GPR37,HSP90AA1,HSPH1,IL18,IL31RA,IL6,KLB,LEP,MAP3K14,MMD,OPRD1,PDGFD,PLA2G2A,PRKAR1A,PRKAR2B,RARRES2,RASGRP1,SPHK1,SYK,TDGF1,THBS1,THBS4,TLR6
GO:0032102	negative regulation of response to external stimulus	biological_process	14/414	271/19098	2.38312	0.00248463	0.0277963	14	ACP5,ADAMTS18,ADIPOQ,ADORA2A,AOAH,C5orf30,CCL2,FABP7,FCGR2B,LEP,SERPINB2,SERPINE1,THBS1,TNFAIP8L2
GO:0042581	specific granule	cellular_component	10/414	159/19098	2.90129	0.0025033	0.0279596	10	C3AR1,CD53,CYBB,DOCK2,ITGAM,ITGB2,RAB37,SLC2A5,SLPI,TRPM2
GO:0009893	positive regulation of metabolic process	biological_process	92/414	3215/19098	1.32006	0.00251099	0.028	92	ABCG1,ACTN3,ACVR1C,ADIPOQ,ADM,AKR1C3,ARNTL,AVPR1A,C3,C5AR1,C6,CALM1,CCL2,CCL5,CD4,CEBPA,CITED2,CLEC3B,CR1,CREB5,CSF1R,CSF3,CSRP3,CXCL9,CYBB,DCUN1D4,DDX11,DGAT2,E2F2,E2F8,F2R,FCGR2B,FGF9,FOSL1,GPR37,HDAC4,HIST1H1B,HIST1H3B,HIST1H3C,HIST1H3F,HIST1H3I,HSP90AA1,HSPA1B,HSPH1,IL18,IL31RA,IL6,IL7R,ITGAM,ITGB2,JCHAIN,KLB,KLF1,LEP,LMO1,LONRF3,MAP3K14,MMD,NOS1,NR4A3,NSF,OPRD1,PCK1,PDGFD,PIK3R2,PLA2G2A,PLEK…
GO:0048018	receptor ligand activity	molecular_function	20/414	458/19098	2.01443	0.00252347	0.0280935	20	ADA2,ADIPOQ,ADM,BTC,CCL2,CCL5,CSF3,CXCL14,CXCL3,CXCL9,EFEMP1,FBN1,FGF9,GRN,IL18,IL6,LEP,PDGFD,TDGF1,THBS4
GO:0002886	regulation of myeloid leukocyte mediated immunity	biological_process	5/414	44/19098	5.24209	0.00253182	0.0280954	5	C3,FCGR2B,ITGAM,ITGB2,SYK
GO:0071827	plasma lipoprotein particle organization	biological_process	5/414	44/19098	5.24209	0.00253182	0.0280954	5	ABCA1,ABCG1,ALB,PLA2G2A,PLTP
GO:0002026	regulation of the force of heart contraction	biological_process	4/414	27/19098	6.83414	0.00257292	0.028458	4	ADM,CSRP3,MYL3,NOS1
GO:0050820	positive regulation of coagulation	biological_process	4/414	27/19098	6.83414	0.00257292	0.028458	4	F2R,PLEK,SERPINE1,THBS1
GO:0051928	positive regulation of calcium ion transport	biological_process	8/414	109/19098	3.38572	0.00257692	0.028458	8	CALM1,CCL2,CCL5,CD4,CXCL9,F2R,F2RL3,TRPV3
GO:0030168	platelet activation	biological_process	10/414	160/19098	2.88315	0.00262002	0.0288875	10	ADAMTS18,CSRP1,F2R,F2RL3,IL6,ITGA2B,PLEK,PRKCB,SYK,TREML1
GO:0000302	response to reactive oxygen species	biological_process	12/414	215/19098	2.57472	0.00264625	0.02913	12	AKR1C3,AQP1,FOSL1,GPR37,HSPH1,IL6,NQO1,NR4A3,PDGFD,SDC1,TRPM2,TXNRD1
GO:0048545	response to steroid hormone	biological_process	18/414	396/19098	2.09684	0.00266644	0.0293052	18	ADIPOQ,ADM,AKR1C3,ALPL,AQP1,ARNTL,AVPR1A,CYBB,FOSL1,GOT1,GPAM,IL6,NR4A3,RXRG,S100B,SDC1,SFRP1,THBS1
GO:0055088	lipid homeostasis	biological_process	8/414	110/19098	3.35494	0.00272776	0.0294547	8	ABCA1,ABCG1,AKR1C1,CEBPA,DGAT2,GOT1,GPAM,IL18
GO:0001847	opsonin receptor activity	molecular_function	2/414	4/19098	23.0652	0.0027326	0.0294547	2	C5AR1,CR1
GO:0001905	activation of membrane attack complex	biological_process	2/414	4/19098	23.0652	0.0027326	0.0294547	2	C3,C6
GO:0001915	negative regulation of T cell mediated cytotoxicity	biological_process	2/414	4/19098	23.0652	0.0027326	0.0294547	2	FCGR2B,IL7R
GO:0001969	regulation of activation of membrane attack complex	biological_process	2/414	4/19098	23.0652	0.0027326	0.0294547	2	C3,C6
GO:0007621	negative regulation of female receptivity	biological_process	2/414	4/19098	23.0652	0.0027326	0.0294547	2	AVPR1A,PPP1R1B
GO:0042253	granulocyte macrophage colony-stimulating factor biosynthetic process	biological_process	2/414	4/19098	23.0652	0.0027326	0.0294547	2	IL18,SYK
GO:0042571	immunoglobulin complex, circulating	cellular_component	2/414	4/19098	23.0652	0.0027326	0.0294547	2	IGLL5,JCHAIN
GO:0043315	positive regulation of neutrophil degranulation	biological_process	2/414	4/19098	23.0652	0.0027326	0.0294547	2	ITGAM,ITGB2
GO:0045356	positive regulation of interferon-alpha biosynthetic process	biological_process	2/414	4/19098	23.0652	0.0027326	0.0294547	2	TLR7,TLR8
GO:0046102	inosine metabolic process	biological_process	2/414	4/19098	23.0652	0.0027326	0.0294547	2	ADA2,PNP
GO:1902565	positive regulation of neutrophil activation	biological_process	2/414	4/19098	23.0652	0.0027326	0.0294547	2	ITGAM,ITGB2
GO:0008083	growth factor activity	molecular_function	10/414	161/19098	2.86524	0.00274106	0.0294547	10	ADA2,BTC,CSF3,EFEMP1,FGF9,GRN,IL6,PDGFD,TDGF1,THBS4
GO:0016999	antibiotic metabolic process	biological_process	9/414	135/19098	3.07536	0.00274565	0.0294547	9	ACSS1,AKR1C1,AKR1C2,AKR1C3,CYBB,GPX3,MPV17L,PXDNL,RENBP
GO:0034612	response to tumor necrosis factor	biological_process	15/414	304/19098	2.27617	0.00274743	0.0294547	15	ADIPOQ,CCL2,CCL5,CEBPA,HDAC4,HSPA1B,MAP3K14,PCK1,RFFL,SELE,SFRP1,SPHK1,SYK,TDGF1,THBS1
GO:0061134	peptidase regulator activity	molecular_function	12/414	216/19098	2.5628	0.00274864	0.0294547	12	C3,C4A,C4B,CST7,NAIP,RENBP,SERPINB1,SERPINB2,SERPINE1,SLPI,TFPI2,WFIKKN1
GO:0009966	regulation of signal transduction	biological_process	89/414	3101/19098	1.32396	0.00275312	0.0294566	89	ABCA1,ACTN3,ADA2,ADIPOQ,ADM,ADORA2A,AKR1C2,AKR1C3,ARC,ARHGAP20,ARHGAP36,ARNTL,BLNK,BTC,C3,C5AR1,CALM1,CCL2,CCL5,CD4,CISH,CITED2,CSF1R,CSF3,CXCL14,CXCL3,CXCL9,DLK1,DTX1,DUSP2,EFEMP1,F2R,F2RL3,FBN1,FCGR2B,FGF9,GPAM,GPR37,GPRC5A,GRAP2,GRN,HHIP,HSP90AA1,HSPA1B,HSPH1,IER3,IL18,IL1RL1,IL31RA,IL6,IL7R,KLB,LEP,LMCD1,MAP3K14,MDM4,MPV17L,NAIP,NOS1,PALM,PDGFD,PIK3AP1,PIK3R2,PLA2G2A,PLEK,PRKAG3,PRKCB,PTP4A3,…
GO:0008270	zinc ion binding	molecular_function	30/414	803/19098	1.72343	0.00278482	0.0297495	30	ADA2,ADAMTS15,ADAMTS8,ADAMTS9,CD4,CPXM1,CSRP1,DTX1,FBXO30,HDAC4,HHIP,LMCD1,LVRN,MARCH1,MDM4,MMP19,MT1A,MT1M,NR4A3,PRKCB,RASGRP1,RXRG,S100B,TRIM14,TRIM9,TTF2,ZFAND2A,ZNF117,ZNF331,ZNF385A
GO:0004888	transmembrane signaling receptor activity	molecular_function	42/414	1241/19098	1.56122	0.00280614	0.0299307	42	ABCA1,ACKR4,ACVR1C,ADGRV1,ADORA2A,AGTRAP,AVPR1A,C3AR1,C5AR1,CD4,CD5,CHRNA1,CR1,CSF1R,EFEMP1,EVI2A,F2R,F2RL3,FCGR2B,GABRE,GPR135,GPR174,GPR37,GPRC5A,IL10RA,IL12RB2,IL1RL1,IL31RA,IL7R,ITGB2,LILRB5,LYVE1,MRC1,OPRD1,PTGFR,SELE,SFRP1,SFRP4,SPHK1,TLR6,TLR7,VIPR2
GO:0046209	nitric oxide metabolic process	biological_process	6/414	65/19098	4.25819	0.00281211	0.0299479	6	ACP5,HSP90AA1,ITGB2,NOS1,NQO1,TLR6
GO:0030016	myofibril	cellular_component	12/414	217/19098	2.55099	0.00285424	0.0303495	12	ACTN3,CALM1,CSRP3,HDAC4,IGFN1,MYH7B,MYL3,MYOM3,MYOZ3,NOS1,PDE4B,SLC4A1
GO:0034367	protein-containing complex remodeling	biological_process	4/414	28/19098	6.59006	0.00295102	0.0312335	4	ABCG1,ALB,PLA2G2A,PLTP
GO:0034368	protein-lipid complex remodeling	biological_process	4/414	28/19098	6.59006	0.00295102	0.0312335	4	ABCG1,ALB,PLA2G2A,PLTP
GO:0034369	plasma lipoprotein particle remodeling	biological_process	4/414	28/19098	6.59006	0.00295102	0.0312335	4	ABCG1,ALB,PLA2G2A,PLTP
GO:0015718	monocarboxylic acid transport	biological_process	10/414	163/19098	2.83009	0.00299655	0.0316666	10	AKR1C1,ALB,EMB,LEP,MPC1,PLA2G2A,SLC38A3,SYK,THBS1,THRSP
GO:0006942	regulation of striated muscle contraction	biological_process	7/414	88/19098	3.66947	0.00300811	0.0317399	7	ACTN3,CALM1,DSC2,HDAC4,MYL3,NOS1,PDE4B
GO:0006957	complement activation, alternative pathway	biological_process	3/414	14/19098	9.88509	0.00308122	0.0322524	3	C3,CFB,CR1
GO:0031089	platelet dense granule lumen	cellular_component	3/414	14/19098	9.88509	0.00308122	0.0322524	3	CLEC3B,LGALS3BP,RARRES2
GO:2000353	positive regulation of endothelial cell apoptotic process	biological_process	3/414	14/19098	9.88509	0.00308122	0.0322524	3	AKR1C3,CD248,THBS1
GO:2000479	regulation of cAMP-dependent protein kinase activity	biological_process	3/414	14/19098	9.88509	0.00308122	0.0322524	3	ADIPOQ,PRKAR1A,PRKAR2B
GO:0046456	icosanoid biosynthetic process	biological_process	5/414	46/19098	5.01418	0.00308485	0.0322524	5	AKR1C3,AVPR1A,HPGDS,PTGS1,SYK
GO:0046850	regulation of bone remodeling	biological_process	5/414	46/19098	5.01418	0.00308485	0.0322524	5	CSF1R,IL6,LEP,SFRP1,SYK
GO:0051346	negative regulation of hydrolase activity	biological_process	19/414	434/19098	2.01954	0.00311308	0.0324981	19	ADORA2A,AQP1,C3,C4A,C4B,CR1,CST7,NAIP,NOS1,PPP1R1B,RENBP,RFFL,SERPINB1,SERPINB2,SERPINE1,SLPI,TFPI2,THBS1,WFIKKN1
GO:1901699	cellular response to nitrogen compound	biological_process	25/414	635/19098	1.81616	0.00314801	0.0328129	25	ADIPOQ,AGTRAP,AQP1,CISH,CYBB,DDX11,FBN1,FCGR2B,FOLR2,GOT1,KLF1,LEP,NR4A3,PCK1,PDE4B,PDGFD,PIK3R2,PRKAR1A,PRKAR2B,PRKCB,RARRES2,SFRP1,TLR6,TRPM2,TUSC5
GO:0050790	regulation of catalytic activity	biological_process	67/414	2221/19098	1.3916	0.00316447	0.0329345	67	ACVR1C,ADIPOQ,ADORA2A,AQP1,ARHGAP20,ARHGAP36,AVPR1A,C3,C4A,C4B,C5AR1,CALM1,CCL2,CCL5,CD4,CEBPA,CISH,CR1,CSF1R,CST7,DCUN1D4,DDX11,DNAJB1,DOCK2,DUSP2,F2R,GPRC5A,GRPEL2,HSP90AA1,HSPH1,IL18,ITGAM,ITK,LEP,MAP3K14,MMD,MYL3,NAIP,NOS1,NQO1,NRBF2,PALM,PDGFD,PIK3R2,PLEK,PPP1R1B,PPP1R3C,PPT1,PRKAR1A,PRKAR2B,RASGRP1,RCAN2,RENBP,RFFL,SELE,SERPINB1,SERPINB2,SERPINE1,SFRP1,SLPI,SYK,TDGF1,TFPI2,THBS1,TLR6,VIPR2,…
GO:0001906	cell killing	biological_process	9/414	138/19098	3.00851	0.00318189	0.0330158	9	ALB,CADM1,FCGR2B,IL18,IL7R,LEP,RAET1E,RASGRP1,SH2D1A
GO:0044344	cellular response to fibroblast growth factor stimulus	biological_process	9/414	138/19098	3.00851	0.00318189	0.0330158	9	CCL2,CCL5,FGF9,HHIP,KLB,SFRP1,SHISA2,TDGF1,THBS1
GO:0009266	response to temperature stimulus	biological_process	12/414	220/19098	2.51621	0.00319093	0.0330596	12	ADM,DNAJB1,HSP90AA1,HSPA1B,HSPA6,HSPH1,LRP11,NOS1,TFEC,THBS1,TRPM2,TRPV3
GO:1901570	fatty acid derivative biosynthetic process	biological_process	7/414	89/19098	3.62824	0.00320548	0.0331603	7	AKR1C3,AVPR1A,BDH1,HPGDS,PPT1,PTGS1,SYK
GO:0051241	negative regulation of multicellular organismal process	biological_process	37/414	1065/19098	1.60265	0.00323953	0.0334622	37	ACP5,ACTN3,ACVR1C,ADAMTS18,ADAMTS9,ADIPOQ,ADM,AVPR1A,C1QC,C5orf30,CITED2,DTX1,E2F2,EFEMP1,F2R,FBN1,FCGR2B,HDAC4,HPGDS,IL1RL1,IL6,IRX3,LEP,PDE4B,S100B,SERPINB2,SERPINE1,SFRP1,THBS1,THBS4,TIGIT,TLR6,TLR8,TMEM176A,TMEM176B,TNMD,TRPV3
GO:0014909	smooth muscle cell migration	biological_process	6/414	67/19098	4.13108	0.00327707	0.0337991	6	ADIPOQ,ARPC5,CCL5,HDAC4,PDGFD,SERPINE1
GO:0090322	regulation of superoxide metabolic process	biological_process	4/414	29/19098	6.36282	0.0033654	0.034658	4	ACP5,ITGAM,ITGB2,SYK
GO:0008206	bile acid metabolic process	biological_process	5/414	47/19098	4.90749	0.00339177	0.0348252	5	AKR1C1,CH25H,LEP,OSBPL3,OSBPL6
GO:0071825	protein-lipid complex subunit organization	biological_process	5/414	47/19098	4.90749	0.00339177	0.0348252	5	ABCA1,ABCG1,ALB,PLA2G2A,PLTP
GO:0098589	membrane region	cellular_component	15/414	311/19098	2.22494	0.0034016	0.034874	15	ABCA1,CD4,F2R,ITGAM,ITGB2,LIPE,NOS1,OPRD1,PPT1,PRKAR1A,PRKAR2B,SELE,SELPLG,TDGF1,TLR6
GO:2001057	reactive nitrogen species metabolic process	biological_process	6/414	68/19098	4.07033	0.00352993	0.0361358	6	ACP5,HSP90AA1,ITGB2,NOS1,NQO1,TLR6
GO:0046631	alpha-beta T cell activation	biological_process	8/414	115/19098	3.20907	0.00358823	0.0366779	8	ADORA2A,DOCK2,HSPH1,IL18,IL6,ITK,PNP,SYK
GO:0030017	sarcomere	cellular_component	11/414	195/19098	2.60223	0.0036208	0.0369558	11	ACTN3,CALM1,CSRP3,HDAC4,IGFN1,MYL3,MYOM3,MYOZ3,NOS1,PDE4B,SLC4A1
GO:0032649	regulation of interferon-gamma production	biological_process	7/414	91/19098	3.54849	0.00362975	0.0369922	7	IL12RB2,IL18,IL1RL1,PDE4B,RASGRP1,TLR7,TLR8
GO:0006732	coenzyme metabolic process	biological_process	17/414	376/19098	2.08568	0.0036519	0.0371628	17	ACSS1,ACTN3,COQ10A,DGAT2,FDXR,FOLR2,GLYAT,GPAM,HDAC4,MPC1,NMRK2,PDPR,PGAM2,PNP,PPT1,RPE,VNN1
GO:0031399	regulation of protein modification process	biological_process	54/414	1721/19098	1.44744	0.00369208	0.0375036	54	ADIPOQ,ADORA2A,ARNTL,C3,C5AR1,CALM1,CCL2,CCL5,CD4,CEBPA,CISH,CSF1R,CSF3,DCUN1D4,DUSP2,F2R,FCGR2B,FGF9,GPR37,GPRC5A,HDAC4,HIST1H1B,HSP90AA1,HSPA1B,HSPH1,IL18,IL31RA,IL6,ITGB2,KLB,LEP,MAP3K14,MMD,NOS1,OPRD1,PDGFD,PIK3R2,PLA2G2A,PPP1R1B,PPP1R3C,PRKAR1A,PRKAR2B,RARRES2,RASGRP1,RCAN2,SFRP1,SPHK1,SYK,TDGF1,THBS1,THBS4,TLR6,TLR7,TLR8
GO:0044057	regulation of system process	biological_process	21/414	507/19098	1.91073	0.0036974	0.0375036	21	ACTN3,ADIPOQ,ADM,ADORA2A,AQP1,AVPR1A,CALM1,CSRP3,DSC2,F2R,HDAC4,KCNJ5,LEP,LMCD1,MYL3,NOS1,NR4A3,OPRD1,PDE4B,S100B,SPHK1
GO:0046486	glycerolipid metabolic process	biological_process	19/414	441/19098	1.98748	0.00370177	0.0375036	19	BTC,C3,CDS1,CSF1R,DGAT2,FABP7,FGF9,GPAM,HRASLS5,KLB,LIPE,PCK1,PHOSPHO1,PIK3AP1,PIK3R2,PLA2G2A,PLBD1,PLEK,THRSP
GO:0015849	organic acid transport	biological_process	15/414	314/19098	2.20368	0.00371863	0.0375636	15	ADORA2A,AKR1C1,ALB,AVPR1A,EMB,FOLR2,LEP,MPC1,PLA2G2A,SLC38A3,SLC6A6,SLC7A10,SYK,THBS1,THRSP
GO:0046942	carboxylic acid transport	biological_process	15/414	314/19098	2.20368	0.00371863	0.0375636	15	ADORA2A,AKR1C1,ALB,AVPR1A,EMB,FOLR2,LEP,MPC1,PLA2G2A,SLC38A3,SLC6A6,SLC7A10,SYK,THBS1,THRSP
GO:0055114	oxidation-reduction process	biological_process	35/414	1001/19098	1.61295	0.00375639	0.0378893	35	ACSS1,ACTN3,ADIPOQ,AKR1C1,AKR1C2,AKR1C3,ALDH3A2,BDH1,CALM1,CH25H,COQ10A,CP,CYB561D2,CYBB,DGAT2,DHRS7C,FDXR,FMO3,GPX3,LEP,LOXL1,NOS1,NQO1,NR4A3,PDPR,PGAM2,PPP1R3A,PPP1R3C,PRKAG3,PTGS1,PXDNL,SRXN1,STEAP3,TECRL,TXNRD1
GO:0045598	regulation of fat cell differentiation	biological_process	8/414	116/19098	3.18141	0.00378305	0.038006	8	ADIPOQ,ARNTL,CEBPA,IL6,LEP,RARRES2,SFRP1,ZNF385A
GO:0002922	positive regulation of humoral immune response	biological_process	3/414	15/19098	9.22609	0.00379008	0.038006	3	C3,C6,FCGR2B
GO:0008106	alcohol dehydrogenase (NADP+) activity	molecular_function	3/414	15/19098	9.22609	0.00379008	0.038006	3	AKR1C1,AKR1C2,AKR1C3
GO:0032645	regulation of granulocyte macrophage colony-stimulating factor production	biological_process	3/414	15/19098	9.22609	0.00379008	0.038006	3	IL18,RASGRP1,SYK
GO:0015248	sterol transporter activity	molecular_function	4/414	30/19098	6.15072	0.00381764	0.0381154	4	ABCA1,ABCG1,OSBPL3,OSBPL6
GO:0051955	regulation of amino acid transport	biological_process	4/414	30/19098	6.15072	0.00381764	0.0381154	4	ADORA2A,AVPR1A,LEP,SLC38A3
GO:0090023	positive regulation of neutrophil chemotaxis	biological_process	4/414	30/19098	6.15072	0.00381764	0.0381154	4	C3AR1,C5AR1,CXCL3,THBS4
GO:0022617	extracellular matrix disassembly	biological_process	7/414	92/19098	3.50992	0.00385725	0.0384549	7	ADAMTS4,CMA1,CTSL,CTSS,ELN,FBN1,MMP19
GO:0060627	regulation of vesicle-mediated transport	biological_process	20/414	476/19098	1.93825	0.00389274	0.0387525	20	ADIPOQ,C2,C3,C4A,C4B,CCL2,DOCK2,FCGR2B,ITGAM,ITGB2,NSF,PPT1,RAB37,SDC1,SELE,SERPINE1,SFRP4,STON2,SYK,TRIM9
GO:0002244	hematopoietic progenitor cell differentiation	biological_process	11/414	197/19098	2.57581	0.00391101	0.038878	11	CITED2,HIST1H3B,HIST1H3C,HIST1H3F,HIST1H3I,LMO1,MLF1,PLEK,SFRP1,STON2,TOP2A
GO:0046394	carboxylic acid biosynthetic process	biological_process	18/414	411/19098	2.02031	0.00393912	0.0391009	18	ACSS1,ACTN3,ADIPOQ,AKR1C3,AVPR1A,BCAT1,CH25H,GOT1,GPT2,HDAC4,HPGDS,OSBPL3,OSBPL6,PGAM2,PRKAG3,PTGS1,SYK,TECRL
GO:0048585	negative regulation of response to stimulus	biological_process	48/414	1495/19098	1.48111	0.00400295	0.0396771	48	ACP5,ACTN3,ADAMTS18,ADIPOQ,ADM,ADORA2A,AOAH,ARNTL,BTC,C5orf30,CALM1,CCL2,CCL5,CISH,CR1,DLK1,DUSP2,FABP7,FBN1,FCGR2B,FGF9,GPR37,GPRC5A,HHIP,HSPA1B,HSPH1,IL1RL1,IL6,IL7R,LEP,MPV17L,NR4A3,PALM,PIK3R2,PLEK,PRKCB,RFFL,SERPINB2,SERPINE1,SFRP1,SFRP4,SHISA2,THBS1,TLR6,TNFAIP8L2,VNN1,WFIKKN1,ZNF385A
GO:0071356	cellular response to tumor necrosis factor	biological_process	14/414	286/19098	2.25813	0.00402422	0.0398305	14	ADIPOQ,CCL2,CCL5,CEBPA,HDAC4,HSPA1B,MAP3K14,PCK1,RFFL,SFRP1,SPHK1,SYK,TDGF1,THBS1
GO:0016053	organic acid biosynthetic process	biological_process	18/414	412/19098	2.01541	0.00403931	0.0399099	18	ACSS1,ACTN3,ADIPOQ,AKR1C3,AVPR1A,BCAT1,CH25H,GOT1,GPT2,HDAC4,HPGDS,OSBPL3,OSBPL6,PGAM2,PRKAG3,PTGS1,SYK,TECRL
GO:0062013	positive regulation of small molecule metabolic process	biological_process	10/414	170/19098	2.71355	0.00404386	0.0399099	10	ABCG1,ACTN3,ADIPOQ,ADM,AVPR1A,CALM1,CXCL9,DGAT2,NOS1,NR4A3
GO:0008009	chemokine activity	molecular_function	5/414	49/19098	4.70719	0.00407047	0.0400001	5	CCL2,CCL5,CXCL14,CXCL3,CXCL9
GO:0010518	positive regulation of phospholipase activity	biological_process	5/414	49/19098	4.70719	0.00407047	0.0400001	5	AVPR1A,C5AR1,CCL5,ITK,SELE
GO:0010828	positive regulation of glucose transmembrane transport	biological_process	5/414	49/19098	4.70719	0.00407047	0.0400001	5	ADIPOQ,C3,NR4A3,PIK3R2,RARRES2
GO:0042509	regulation of tyrosine phosphorylation of STAT protein	biological_process	6/414	70/19098	3.95404	0.00407878	0.0400245	6	CCL5,CSF1R,IL18,IL31RA,IL6,LEP
GO:0004896	cytokine receptor activity	molecular_function	7/414	93/19098	3.47218	0.00409541	0.0401304	7	ACKR4,CD4,IL10RA,IL12RB2,IL1RL1,IL31RA,IL7R
GO:0012501	programmed cell death	biological_process	61/414	2006/19098	1.40277	0.00410817	0.040198	61	ACTN3,ACVR1C,ADIPOQ,ADM,ADORA2A,AKR1C3,ALB,AQP1,BTC,C5AR1,CADM1,CCL2,CCL5,CD248,CD5,CHL1,CIDEC,CITED2,CSF1R,CTSL,DSC2,E2F2,ERCC5,F2R,FOSL1,GPAM,HDAC4,HHIP,HSPA1B,HSPH1,IER3,IL31RA,IL6,ITGB2,KRT31,LEP,MAP3K14,MDM4,MPV17L,NAIP,NQO1,NR4A3,PPT1,PRKCB,PTGFR,RFFL,S100B,SERPINB2,SERPINE1,SFRP1,SFRP4,SLC25A4,SPHK1,STEAP3,TDGF1,TGM2,THBS1,TNFAIP8L2,TOP2A,VNN1,ZNF385A
GO:0045860	positive regulation of protein kinase activity	biological_process	21/414	512/19098	1.89207	0.00413522	0.0404052	21	ADIPOQ,C5AR1,CALM1,CCL5,CD4,CSF1R,F2R,HSP90AA1,HSPH1,IL18,LEP,MAP3K14,MMD,PDGFD,PRKAR1A,PRKAR2B,RASGRP1,SYK,TDGF1,THBS1,TLR6
GO:0050707	regulation of cytokine secretion	biological_process	10/414	171/19098	2.69769	0.00421453	0.0411216	10	CADM1,CSF1R,F2R,FCGR2B,GPAM,IL1RL1,RASGRP1,SYK,TLR6,TLR8
GO:0010646	regulation of cell communication	biological_process	95/414	3398/19098	1.2897	0.00422775	0.0411921	95	ABCA1,ACTN3,ACVR1C,ADA2,ADIPOQ,ADM,ADORA2A,AKR1C2,AKR1C3,ARC,ARHGAP20,ARHGAP36,ARNTL,AVPR1A,BLNK,BTC,C3,C5AR1,CALM1,CCL2,CCL5,CD4,CISH,CITED2,CSF1R,CSF3,CXCL14,CXCL3,CXCL9,DLK1,DTX1,DUSP2,EFEMP1,F2R,F2RL3,FBN1,FCGR2B,FGF9,GPAM,GPR37,GPRC5A,GRAP2,GRN,HHIP,HSP90AA1,HSPA1B,HSPH1,IER3,IL18,IL1RL1,IL31RA,IL6,IL7R,KCNS3,KLB,LEP,LMCD1,MAP3K14,MDM4,MPV17L,NAIP,NOS1,PALM,PDGFD,PIK3AP1,PIK3R2,PLA2G2A,PLEK,…
GO:0051336	regulation of hydrolase activity	biological_process	41/414	1233/19098	1.53394	0.00426815	0.041476	41	ACVR1C,ADORA2A,AQP1,ARHGAP20,ARHGAP36,AVPR1A,C3,C4A,C4B,C5AR1,CALM1,CCL2,CCL5,CR1,CST7,DDX11,DNAJB1,DOCK2,F2R,ITK,MYL3,NAIP,NOS1,PIK3R2,PLEK,PPP1R1B,PPP1R3C,PPT1,RASGRP1,RCAN2,RENBP,RFFL,SELE,SERPINB1,SERPINB2,SERPINE1,SFRP1,SLPI,TFPI2,THBS1,WFIKKN1
GO:0062012	regulation of small molecule metabolic process	biological_process	20/414	480/19098	1.9221	0.00426897	0.041476	20	ABCG1,ACTN3,ADIPOQ,ADM,AKR1C3,AVPR1A,CALM1,CXCL9,DGAT2,GPAM,HDAC4,LEP,NOS1,NQO1,NR4A3,PALM,PDPR,PGAM2,PLEK,THBS1
GO:0032365	intracellular lipid transport	biological_process	4/414	31/19098	5.95231	0.00430934	0.041734	4	ABCA1,ABCG1,CES1,THRSP
GO:0033363	secretory granule organization	biological_process	4/414	31/19098	5.95231	0.00430934	0.041734	4	ABCA1,F2R,F2RL3,ZNF385A
GO:0043086	negative regulation of catalytic activity	biological_process	29/414	792/19098	1.68912	0.00431375	0.041734	29	ADIPOQ,ADORA2A,AQP1,C3,C4A,C4B,CEBPA,CISH,CR1,CST7,DUSP2,GPRC5A,NAIP,NOS1,NQO1,PALM,PPP1R1B,PRKAR1A,PRKAR2B,RENBP,RFFL,SERPINB1,SERPINB2,SERPINE1,SFRP1,SLPI,TFPI2,THBS1,WFIKKN1
GO:0043167	ion binding	molecular_function	159/414	6159/19098	1.1909	0.00434358	0.0418585	159	ABCA1,ABCB5,ABCG1,AC067968.1,ACP5,ACSS1,ACTN3,ACVR1C,ADA2,ADAM28,ADAMTS15,ADAMTS18,ADAMTS4,ADAMTS8,ADAMTS9,ADGRV1,ADIPOQ,ADSSL1,AKR1C1,AKR1C2,ALB,ALPL,ATP5F1D,C1S,C2,CA14,CALM1,CALML6,CCDC80,CD209,CD248,CD4,CH25H,CHRNA1,CKMT2,CLEC3B,COL11A1,COL11A2,CP,CPXM1,CREB5,CSF1R,CSRP1,CSRP3,CYB561D2,CYBB,DDX11,DLK1,DSC2,DTX1,EFEMP1,EGFL6,EPB42,ERCC5,F13A1,FAT3,FBN1,FBXO30,FDXR,FGF9,FMO3,FOLR2,FRAS1,GALNT8,…
GO:0043202	lysosomal lumen	cellular_component	7/414	94/19098	3.43525	0.00434455	0.0418585	7	CTSL,CTSS,HSP90AA1,KERA,MAN2B1,PPT1,SDC1
GO:0006508	proteolysis	biological_process	55/414	1774/19098	1.4302	0.0043449	0.0418585	55	ACVR1C,ADAM28,ADAMTS15,ADAMTS18,ADAMTS4,ADAMTS8,ADAMTS9,ADORA2A,AQP1,ARNTL,C1QA,C1QB,C1QC,C1S,C2,C3,C3AR1,C4A,C4B,C5AR1,C6,CEBPA,CFB,CLEC3B,CMA1,CPVL,CPXM1,CR1,CST7,CTSL,CTSS,F2R,LONRF3,LVRN,MASP1,MDM4,MMP19,NAIP,PRSS42,PYHIN1,RENBP,RFFL,SENP3-EIF4A1,SERPINB1,SERPINB2,SERPINE1,SFRP1,SLPI,TFPI2,THBS1,TPSB2,TRIM9,WFIKKN1,XPNPEP2,ZFAND2A
GO:1900407	regulation of cellular response to oxidative stress	biological_process	6/414	71/19098	3.89835	0.00437572	0.0420375	6	GPR37,HSPH1,NR4A3,TLR6,TRPM2,VNN1
GO:1903426	regulation of reactive oxygen species biosynthetic process	biological_process	6/414	71/19098	3.89835	0.00437572	0.0420375	6	ACP5,HDAC4,HSP90AA1,ITGB2,MPV17L,TLR6
GO:0043292	contractile fiber	cellular_component	12/414	229/19098	2.41732	0.00439808	0.0421933	12	ACTN3,CALM1,CSRP3,HDAC4,IGFN1,MYH7B,MYL3,MYOM3,MYOZ3,NOS1,PDE4B,SLC4A1
GO:0071774	response to fibroblast growth factor	biological_process	9/414	145/19098	2.86327	0.00441271	0.0422747	9	CCL2,CCL5,FGF9,HHIP,KLB,SFRP1,SHISA2,TDGF1,THBS1
GO:0003044	regulation of systemic arterial blood pressure mediated by a chemical signal	biological_process	5/414	50/19098	4.61304	0.00444386	0.0424546	5	AVPR1A,CMA1,F2R,RASL10B,SLC2A5
GO:0048260	positive regulation of receptor-mediated endocytosis	biological_process	5/414	50/19098	4.61304	0.00444386	0.0424546	5	PPT1,SELE,SERPINE1,SFRP4,SYK
GO:0015057	thrombin-activated receptor activity	molecular_function	2/414	5/19098	18.4522	0.00448906	0.0425903	2	F2R,F2RL3
GO:0036021	endolysosome lumen	cellular_component	2/414	5/19098	18.4522	0.00448906	0.0425903	2	CTSL,CTSS
GO:0071332	cellular response to fructose stimulus	biological_process	2/414	5/19098	18.4522	0.00448906	0.0425903	2	PCK1,SLC2A5
GO:1903223	positive regulation of oxidative stress-induced neuron death	biological_process	2/414	5/19098	18.4522	0.00448906	0.0425903	2	TLR6,TRPM2
GO:2000051	negative regulation of non-canonical Wnt signaling pathway	biological_process	2/414	5/19098	18.4522	0.00448906	0.0425903	2	SFRP1,SFRP4
GO:0005773	vacuole	cellular_component	28/414	759/19098	1.70178	0.00452069	0.0428312	28	ACP5,ADA2,C3,C3AR1,CP,CREG1,CTSL,CTSS,GOT1,GRN,HLA-DMB,HSP90AA1,KERA,MAN2B1,MARCH1,MMD,NR4A3,NRBF2,NSF,PLBD1,PPT1,RAB37,RASGRP1,SDC1,TLR7,TLR8,TRPM2,VNN1
GO:0023051	regulation of signaling	biological_process	96/414	3449/19098	1.284	0.00457085	0.0430361	96	ABCA1,ACTN3,ACVR1C,ADA2,ADIPOQ,ADM,ADORA2A,AKR1C2,AKR1C3,ARC,ARHGAP20,ARHGAP36,ARNTL,AVPR1A,BLNK,BTC,C3,C5AR1,CALM1,CCL2,CCL5,CD4,CISH,CITED2,CSF1R,CSF3,CXCL14,CXCL3,CXCL9,DLK1,DTX1,DUSP2,EFEMP1,F2R,F2RL3,FBN1,FCGR2B,FGF9,GPAM,GPR37,GPRC5A,GRAP2,GRN,HHIP,HSP90AA1,HSPA1B,HSPH1,IER3,IL18,IL1RL1,IL31RA,IL6,IL7R,KCNS3,KLB,LEP,LMCD1,MAP3K14,MDM4,MPV17L,NAIP,NOS1,NSF,PALM,PDGFD,PIK3AP1,PIK3R2,PLA2G2A,P…
GO:0004115	3',5'-cyclic-AMP phosphodiesterase activity	molecular_function	3/414	16/19098	8.64946	0.00459039	0.0430361	3	PDE11A,PDE4B,PDE4C
GO:0010866	regulation of triglyceride biosynthetic process	biological_process	3/414	16/19098	8.64946	0.00459039	0.0430361	3	C3,DGAT2,THRSP
GO:0016755	transferase activity, transferring amino-acyl groups	molecular_function	3/414	16/19098	8.64946	0.00459039	0.0430361	3	EPB42,F13A1,TGM2
GO:0017000	antibiotic biosynthetic process	biological_process	3/414	16/19098	8.64946	0.00459039	0.0430361	3	ACSS1,CYBB,MPV17L
GO:0032604	granulocyte macrophage colony-stimulating factor production	biological_process	3/414	16/19098	8.64946	0.00459039	0.0430361	3	IL18,RASGRP1,SYK
GO:0042095	interferon-gamma biosynthetic process	biological_process	3/414	16/19098	8.64946	0.00459039	0.0430361	3	IL18,TLR7,TLR8
GO:0006641	triglyceride metabolic process	biological_process	7/414	95/19098	3.39908	0.00460497	0.0430361	7	C3,DGAT2,FABP7,GPAM,LIPE,PCK1,THRSP
GO:0010522	regulation of calcium ion transport into cytosol	biological_process	7/414	95/19098	3.39908	0.00460497	0.0430361	7	CALM1,CD4,CXCL9,DHRS7C,F2R,F2RL3,NOS1
GO:0098869	cellular oxidant detoxification	biological_process	7/414	95/19098	3.39908	0.00460497	0.0430361	7	ALB,GPX3,NQO1,PTGS1,PXDNL,SRXN1,TXNRD1
GO:0046718	viral entry into host cell	biological_process	8/414	120/19098	3.07536	0.00464529	0.0433539	8	CD209,CD4,CR1,HSPA1B,ITGB6,MRC1,NCAM1,SELPLG
GO:0007260	tyrosine phosphorylation of STAT protein	biological_process	6/414	72/19098	3.8442	0.00468831	0.0436368	6	CCL5,CSF1R,IL18,IL31RA,IL6,LEP
GO:0045582	positive regulation of T cell differentiation	biological_process	6/414	72/19098	3.8442	0.00468831	0.0436368	6	IL18,IL7R,PNP,RASGRP1,SYK,VNN1
GO:0072330	monocarboxylic acid biosynthetic process	biological_process	14/414	292/19098	2.21173	0.00482505	0.044704	14	ACSS1,ACTN3,ADIPOQ,AKR1C3,AVPR1A,CH25H,HDAC4,HPGDS,OSBPL3,OSBPL6,PGAM2,PRKAG3,PTGS1,TECRL
GO:0006335	DNA replication-dependent nucleosome assembly	biological_process	4/414	32/19098	5.7663	0.00484201	0.044704	4	HIST1H3B,HIST1H3C,HIST1H3F,HIST1H3I
GO:0010574	regulation of vascular endothelial growth factor production	biological_process	4/414	32/19098	5.7663	0.00484201	0.044704	4	C3,C3AR1,C5AR1,IL6
GO:0033028	myeloid cell apoptotic process	biological_process	4/414	32/19098	5.7663	0.00484201	0.044704	4	ADIPOQ,CCL5,CTSL,IL6
GO:0034723	DNA replication-dependent nucleosome organization	biological_process	4/414	32/19098	5.7663	0.00484201	0.044704	4	HIST1H3B,HIST1H3C,HIST1H3F,HIST1H3I
GO:0071624	positive regulation of granulocyte chemotaxis	biological_process	4/414	32/19098	5.7663	0.00484201	0.044704	4	C3AR1,C5AR1,CXCL3,THBS4
GO:0042180	cellular ketone metabolic process	biological_process	12/414	232/19098	2.38606	0.0048733	0.0449325	12	ADIPOQ,ADM,AKR1C1,AKR1C2,AKR1C3,AVPR1A,COQ10A,DGAT2,FDXR,NQO1,NR4A3,PDPR
GO:0016787	hydrolase activity	molecular_function	75/414	2588/19098	1.33686	0.00492187	0.0453195	75	ABCA1,ABCB5,ABCG1,ACP5,ADA2,ADAM28,ADAMTS15,ADAMTS18,ADAMTS4,ADAMTS8,ADAMTS9,ADSSL1,ALPL,AOAH,ATP5F1D,C1QA,C1QB,C1QC,C1S,C2,C3,C4A,C4B,CCL5,CES1,CFB,CHI3L2,CMA1,CPVL,CPXM1,CTSL,CTSS,DDX11,DUSP2,ERCC5,HDAC4,HSP90AA1,HSPA1B,HSPA6,KLB,LIPE,LVRN,MAN2B1,MASP1,MEST,MMP19,MYH7B,MYL3,NSF,PDE11A,PDE4B,PDE4C,PDPR,PGAM2,PHOSPHO1,PLA2G2A,PLBD1,PPP1R3C,PPT1,PRSS42,PTP4A3,PXDNL,RAB37,RAB40C,RASL10B,RNASE1,RND1…
GO:0043549	regulation of kinase activity	biological_process	30/414	836/19098	1.6554	0.00495008	0.0455182	30	ADIPOQ,ADORA2A,C5AR1,CALM1,CCL5,CD4,CEBPA,CISH,CSF1R,DUSP2,F2R,GPRC5A,HSP90AA1,HSPH1,IL18,LEP,MAP3K14,MMD,NRBF2,PDGFD,PIK3R2,PPP1R1B,PRKAR1A,PRKAR2B,RASGRP1,SFRP1,SYK,TDGF1,THBS1,TLR6
GO:0051047	positive regulation of secretion	biological_process	17/414	388/19098	2.02118	0.00498679	0.0457945	17	ADORA2A,AQP1,AVPR1A,CADM1,CSF1R,F2R,IL1RL1,IL6,ITGAM,ITGB2,LEP,RASGRP1,RASL10B,SDC1,SYK,TLR8,TRPM2
GO:0070821	tertiary granule membrane	cellular_component	6/414	73/19098	3.79154	0.00501701	0.0460105	6	CD53,CYBB,ITGAM,ITGB2,SIRPA,TRPM2
GO:0044437	vacuolar part	cellular_component	22/414	555/19098	1.82859	0.00502819	0.0460515	22	ADA2,C3,C3AR1,CP,CREG1,CTSL,CTSS,GRN,HLA-DMB,HSP90AA1,KERA,MAN2B1,MARCH1,MMD,NSF,PPT1,RAB37,SDC1,TLR7,TLR8,TRPM2,VNN1
GO:0003012	muscle system process	biological_process	18/414	421/19098	1.97232	0.00503943	0.046093	18	ACTN3,CALM1,CHRNA1,CKMT2,CSRP3,DSC2,F2R,HDAC4,KCNJ5,LEP,LMCD1,MYL3,MYOM3,NOS1,NR4A3,PDE4B,PGAM2,SPHK1
GO:1904019	epithelial cell apoptotic process	biological_process	7/414	97/19098	3.329	0.00516095	0.0471417	7	AKR1C3,CD248,E2F2,IL6,SERPINE1,SFRP4,THBS1
GO:0001501	skeletal system development	biological_process	20/414	489/19098	1.88673	0.00522675	0.0476794	20	ACP5,ACTN3,ADAMTS4,ALPL,CITED2,COL11A1,COL11A2,EFEMP1,EXTL1,FBN1,FGF9,HDAC4,HHIP,LEP,PHOSPHO1,SFRP1,SFRP4,TMEM110-MUSTN1,WFIKKN1,ZNF385A
GO:0010524	positive regulation of calcium ion transport into cytosol	biological_process	5/414	52/19098	4.43562	0.00526268	0.0479434	5	CALM1,CD4,CXCL9,F2R,F2RL3
GO:0051279	regulation of release of sequestered calcium ion into cytosol	biological_process	6/414	74/19098	3.74031	0.00536232	0.0487865	6	CALM1,CXCL9,DHRS7C,F2R,F2RL3,NOS1
GO:0001912	positive regulation of leukocyte mediated cytotoxicity	biological_process	4/414	33/19098	5.59157	0.00541714	0.0488966	4	CADM1,RAET1E,RASGRP1,SH2D1A
GO:0002823	negative regulation of adaptive immune response based on somatic recombination of immune receptors built from immunoglobulin superfamily domains	biological_process	4/414	33/19098	5.59157	0.00541714	0.0488966	4	CR1,FCGR2B,IL1RL1,IL7R
GO:0008305	integrin complex	cellular_component	4/414	33/19098	5.59157	0.00541714	0.0488966	4	ITGA2B,ITGAM,ITGB2,ITGB6
GO:0010863	positive regulation of phospholipase C activity	biological_process	4/414	33/19098	5.59157	0.00541714	0.0488966	4	AVPR1A,C5AR1,ITK,SELE
GO:0034694	response to prostaglandin	biological_process	4/414	33/19098	5.59157	0.00541714	0.0488966	4	AKR1C2,AKR1C3,PTGFR,SFRP1
GO:1902624	positive regulation of neutrophil migration	biological_process	4/414	33/19098	5.59157	0.00541714	0.0488966	4	C3AR1,C5AR1,CXCL3,THBS4
GO:0030667	secretory granule membrane	cellular_component	14/414	296/19098	2.18184	0.00542715	0.0489227	14	C3AR1,C5AR1,CD53,CR1,CYBB,ITGA2B,ITGAM,ITGB2,RAB37,RAB40C,SIRPA,SLC2A5,TRPM2,VNN1
GO:0005581	collagen trimer	cellular_component	7/414	98/19098	3.29503	0.00545713	0.048997	7	ADIPOQ,C1QA,C1QB,C1QC,COL11A1,COL11A2,COL22A1
GO:0006637	acyl-CoA metabolic process	biological_process	7/414	98/19098	3.29503	0.00545713	0.048997	7	ACSS1,DGAT2,GLYAT,GPAM,MPC1,PDPR,PPT1
GO:0035383	thioester metabolic process	biological_process	7/414	98/19098	3.29503	0.00545713	0.048997	7	ACSS1,DGAT2,GLYAT,GPAM,MPC1,PDPR,PPT1
GO:0016137	glycoside metabolic process	biological_process	3/414	17/19098	8.14066	0.00548532	0.048997	3	AKR1C1,AKR1C2,AKR1C3
GO:0034375	high-density lipoprotein particle remodeling	biological_process	3/414	17/19098	8.14066	0.00548532	0.048997	3	ABCG1,ALB,PLTP
GO:0043931	ossification involved in bone maturation	biological_process	3/414	17/19098	8.14066	0.00548532	0.048997	3	ACTN3,LEP,PHOSPHO1
GO:0051957	positive regulation of amino acid transport	biological_process	3/414	17/19098	8.14066	0.00548532	0.048997	3	ADORA2A,AVPR1A,SLC38A3
GO:0097696	STAT cascade	biological_process	10/414	178/19098	2.5916	0.00557424	0.049662	10	CCL2,CCL5,CISH,CSF1R,F2R,IL18,IL31RA,IL6,IL7R,LEP
GO:0098802	plasma membrane receptor complex	cellular_component	10/414	178/19098	2.5916	0.00557424	0.049662	10	ACVR1C,CD4,CHRNA1,IL6,ITGA2B,ITGAM,ITGB2,ITGB6,SYK,TLR6
GO:0005788	endoplasmic reticulum lumen	cellular_component	14/414	297/19098	2.1745	0.00558675	0.0497091	14	ALB,C3,C4A,CD4,CES1,COL11A1,COL11A2,COL22A1,CP,FBN1,IL6,PDGFD,SPON1,THBS1

## Sheet: Sheet1
id	gene_name	class
ENSG00000023171	GRAMD1B	mRNA
ENSG00000042980	ADAM28	mRNA
ENSG00000054690	PLEKHH1	mRNA
ENSG00000095585	BLNK	mRNA
ENSG00000100505	TRIM9	mRNA
ENSG00000102678	FGF9	mRNA
ENSG00000105967	TFEC	mRNA
ENSG00000110448	CD5	mRNA
ENSG00000113263	ITK	mRNA
ENSG00000116329	OPRD1	mRNA
ENSG00000116983	HPCAL4	mRNA
ENSG00000120262	CCDC170	mRNA
ENSG00000127578	WFIKKN1	mRNA
ENSG00000129048	ACKR4	mRNA
ENSG00000130035	GALNT8	mRNA
ENSG00000131771	PPP1R1B	mRNA
ENSG00000132854	KANK4	mRNA
ENSG00000134755	DSC2	mRNA
ENSG00000142794	NBPF3	mRNA
ENSG00000147138	GPR174	mRNA
ENSG00000163564	PYHIN1	mRNA
ENSG00000163624	CDS1	mRNA
ENSG00000164509	IL31RA	mRNA
ENSG00000164520	RAET1E	mRNA
ENSG00000170775	GPR37	mRNA
ENSG00000172575	RASGRP1	mRNA
ENSG00000174473	GALNTL6	mRNA
ENSG00000174808	BTC	mRNA
ENSG00000177369	AC004797.1	lncRNA
ENSG00000180458	AC022148.1	lncRNA
ENSG00000181847	TIGIT	mRNA
ENSG00000186496	ZNF396	mRNA
ENSG00000204271	SPIN3	mRNA
ENSG00000236671	PRKG1-AS1	lncRNA
ENSG00000241186	TDGF1	mRNA
ENSG00000254166	CASC19	lncRNA
ENSG00000259370	AC103740.1	lncRNA
ENSG00000264589	MAPT-AS1	lncRNA
ENSG00000267724	AC012254.3	lncRNA
ENSG00000275713	HIST1H2BH	mRNA

## Sheet: Sheet2
source	target	cor
ENSG00000023171	ENSG00000254166	0.903596
ENSG00000023171	ENSG00000264589	0.926836
ENSG00000042980	ENSG00000236671	0.920696
ENSG00000054690	ENSG00000264589	0.984969
ENSG00000095585	ENSG00000236671	0.900515
ENSG00000100505	ENSG00000264589	0.984849
ENSG00000102678	ENSG00000180458	0.964569
ENSG00000105967	ENSG00000177369	0.952116
ENSG00000105967	ENSG00000236671	0.945671
ENSG00000110448	ENSG00000177369	0.947961
ENSG00000110448	ENSG00000236671	0.975632
ENSG00000113263	ENSG00000177369	0.982038
ENSG00000113263	ENSG00000236671	0.953412
ENSG00000113263	ENSG00000267724	0.935138
ENSG00000116329	ENSG00000259370	0.950245
ENSG00000116983	ENSG00000177369	0.916273
ENSG00000116983	ENSG00000236671	0.952952
ENSG00000120262	ENSG00000177369	0.931306
ENSG00000127578	ENSG00000236671	0.906642
ENSG00000127578	ENSG00000264589	0.946784
ENSG00000129048	ENSG00000177369	0.934863
ENSG00000129048	ENSG00000236671	0.903196
ENSG00000130035	ENSG00000177369	0.945419
ENSG00000130035	ENSG00000236671	0.929666
ENSG00000131771	ENSG00000177369	0.936766
ENSG00000132854	ENSG00000177369	0.927638
ENSG00000132854	ENSG00000267724	0.918834
ENSG00000134755	ENSG00000177369	0.945065
ENSG00000134755	ENSG00000236671	0.906902
ENSG00000142794	ENSG00000177369	0.927477
ENSG00000142794	ENSG00000236671	0.9662
ENSG00000147138	ENSG00000177369	0.972527
ENSG00000147138	ENSG00000236671	0.977789
ENSG00000163564	ENSG00000267724	0.917833
ENSG00000163624	ENSG00000177369	0.961864
ENSG00000163624	ENSG00000236671	0.938954
ENSG00000164509	ENSG00000254166	0.930309
ENSG00000164520	ENSG00000264589	0.984581
ENSG00000170775	ENSG00000180458	0.98111
ENSG00000172575	ENSG00000177369	0.979939
ENSG00000172575	ENSG00000236671	0.97692
ENSG00000174473	ENSG00000236671	0.935873
ENSG00000174808	ENSG00000254166	0.911973
ENSG00000174808	ENSG00000264589	0.904805
ENSG00000181847	ENSG00000177369	0.943508
ENSG00000186496	ENSG00000177369	0.920993
ENSG00000186496	ENSG00000267724	0.957326
ENSG00000204271	ENSG00000177369	0.950829
ENSG00000204271	ENSG00000236671	0.958914
ENSG00000241186	ENSG00000259370	0.957779
ENSG00000275713	ENSG00000264589	0.954078
