# Supplementary material for: Integrated analysis of long non-coding RNAs (lncRNAs) and mRNA expression profiles identifies lncRNA PRKG1-AS1 playing important roles in skeletal muscle aging
Source: Aging (Albany NY). 2021 May 29;13(11):15044–60. doi: 10.18632/aging.203067 (PMC8221296; doi:10.18632/aging.203067)
Supplement: Supplementary Table 4 [file aging-13-203067-s004.xls]

## Sheet: Supplemental Table 4
Supplementary Table 4. The KEGG terms enriched by differentially expressed genes.
ID	Description	Class	GeneRatio	BgRatio	Enrich_factor	Pvalue	FDR	GeneCount	GeneID
hsa04610	Complement and coagulation cascades	Organismal Systems	21/216	79/6952	8.55556	0	0	21	C6,SERPINE1,F13A1,C3,MASP1,F2RL3,C1QC,ITGB2,C2,ITGAM,C3AR1,C1QB,C1QA,F2R,C1S,C5AR1,SERPINB2,CR1,C4B,CFB,C4A
hsa05150	Staphylococcus aureus infection	Human Diseases	18/216	52/6952	11.141	8.3e-14	1.06e-11	18	FCGR2B,SELPLG,C3,MASP1,C1QC,ITGB2,C2,ITGAM,C3AR1,C1QB,C1QA,HLA-DQB1,C1S,C5AR1,C4B,HLA-DMB,CFB,C4A
hsa05133	Pertussis	Human Diseases	13/216	75/6952	5.57877	4.04e-07	2.91e-05	13	C3,IL6,C1QC,ITGB2,C2,CALML6,ITGAM,C1QB,C1QA,C1S,CALM1,C4B,C4A
hsa05322	Systemic lupus erythematosus	Human Diseases	17/216	130/6952	4.20883	4.54e-07	2.91e-05	17	C6,C3,C1QC,C2,C1QB,C1QA,HLA-DQB1,C1S,C4B,HLA-DMB,C4A,HIST1H3B,HIST1H3I,HIST1H2BH,HIST1H2AJ,HIST1H3F,HIST1H3C
hsa05144	Malaria	Human Diseases	10/216	48/6952	6.70525	1.58e-06	8.11e-05	10	SELE,CSF3,CCL2,THBS4,SDC1,IL6,THBS1,IL18,ITGB2,CR1
hsa05134	Legionellosis	Human Diseases	10/216	55/6952	5.85185	5.85e-06	0.000249762	10	C3,IL6,IL18,ITGB2,CXCL3,ITGAM,HSPA6,CR1,HSPA1B,NAIP
hsa05152	Tuberculosis	Human Diseases	18/216	175/6952	3.31048	7.15e-06	0.000261321	18	FCGR2B,CD209,IL10RA,C3,IL6,IL18,ITGB2,CTSS,SYK,CALML6,ITGAM,TLR6,SPHK1,HLA-DQB1,CALM1,CR1,HLA-DMB,MRC1
hsa04145	Phagosome	Cellular Processes	15/216	148/6952	3.26201	5.05e-05	0.0016147	15	FCGR2B,NOS1,CD209,THBS4,C3,CTSL,THBS1,ITGB2,CTSS,CYBB,ITGAM,TLR6,HLA-DQB1,HLA-DMB,MRC1
hsa05020	Prion diseases	Human Diseases	7/216	34/6952	6.62636	6.67e-05	0.00189773	7	C6,IL6,NCAM1,C1QC,C1QB,C1QA,CCL5
hsa04640	Hematopoietic cell lineage	Organismal Systems	11/216	94/6952	3.76635	0.000144581	0.00370127	11	ITGA2B,CD4,CSF3,CD5,IL6,IL7R,ITGAM,HLA-DQB1,CSF1R,CR1,HLA-DMB
hsa05142	Chagas disease (American trypanosomiasis)	Human Diseases	10/216	100/6952	3.21852	0.00102383	0.0238272	11	PIK3R2,SERPINE1,CCL2,C3,IL6,C1QC,C1QB,C1QA,TLR6,AC007192.1,CCL5
hsa04612	Antigen processing and presentation	Organismal Systems	8/216	68/6952	3.78649	0.00113322	0.0241753	8	CD4,HSP90AA1,CTSL,CTSS,HSPA6,HLA-DQB1,HSPA1B,HLA-DMB
hsa05323	Rheumatoid arthritis	Human Diseases	9/216	86/6952	3.36822	0.00131674	0.0250956	9	ACP5,CCL2,CTSL,IL6,IL18,ITGB2,HLA-DQB1,HLA-DMB,CCL5
hsa05140	Leishmaniasis	Human Diseases	8/216	70/6952	3.67831	0.00137242	0.0250956	8	C3,ITGB2,CYBB,PRKCB,ITGAM,HLA-DQB1,CR1,HLA-DMB
hsa04514	Cell adhesion molecules (CAMs)	Environmental Information Processing	12/216	142/6952	2.71987	0.00148009	0.0252602	12	SELE,CD4,SELPLG,SDC1,NCAM1,ITGB2,ITGAM,HLA-DQB1,TIGIT,CADM1,CLDN5,HLA-DMB
